# Supplementary material for: Development of a detailed gaseous oxidation scheme of naphthalene for SOA formation and speciation
Source: Copernicus journal article supplement (doi:10.5194/egusphere-2024-711), 2024-03-13
Supplement: Supplementary file 1 [file egusphere-2024-711-supplement.pdf]

**Part 1: Naphthalene chemical scheme**

**Part 2: Modeling data**

## Part 1: Naphthalene chemical scheme

Table S1: Stable species list and properties

| Name   | MW<br>(g mol <sup>-1</sup> ) | nbC | nbH | nbO | nbN | Chem code (GECKO-A)                   | Smile code                              | P <sub>sat</sub><br>(torr) | ΔH <sub>vap</sub><br>(kJ) |
|--------|------------------------------|-----|-----|-----|-----|---------------------------------------|-----------------------------------------|----------------------------|---------------------------|
| CH2O   | 30.                          | 1   | 2   | 1   | 0   | CH2O                                  | C(=O)                                   | -                          | -                         |
| CHOOH  | 46.                          | 1   | 2   | 2   | 0   | CHO(OH)                               | C(=O)(O)                                | -                          | -                         |
| DH     | 76.                          | 2   | 4   | 3   | 0   | CHOCH2(OOH)                           | O=CC(OO)                                | 0.112E+01                  | 55.3                      |
| DO     | 60.                          | 2   | 4   | 2   | 0   | CHOCH2(OH)                            | O=CC(O)                                 | 0.769E+01                  | 47.7                      |
| GLYA   | 74.                          | 2   | 2   | 3   | 0   | CHOCO(OH)                             | O=CC(=O)(O)                             | 0.589E+00                  | 58.6                      |
| GLYG   | 90.                          | 2   | 2   | 4   | 0   | CHOCO(OOH)                            | O=CC(=O)(OO)                            | 0.207E+01                  | 53.2                      |
| GLYOX  | 58.                          | 2   | 2   | 2   | 0   | CHOCHO                                | O=CC=O                                  | 0.289E+01                  | 50.7                      |
| HPh    | 110.                         | 6   | 6   | 2   | 0   | c1HcHcHcHc1(OOH)                      | c1ccccc1(OO)                            | 0.530E-01                  | 66.0                      |
| HPhA   | 154.                         | 7   | 6   | 4   | 0   | CO(OH)c1cHcHcHc1(OOH)                 | C(=O)(O)c1ccccc1(OO)                    | 0.993E-06                  | 115.6                     |
| HPhD   | 138.                         | 7   | 6   | 3   | 0   | CHOc1cHcHcHc1(OOH)                    | C(=O)c1ccccc1(OO)                       | 0.952E-03                  | 82.9                      |
| HPhKA  | 182.                         | 8   | 6   | 5   | 0   | c1(OOH)cHcHcHc1COCO(OH)               | c1(OO)cccc1C(=O)C(=O)(O)                | 0.313E-07                  | 130.9                     |
| HPhKKA | 210.                         | 9   | 6   | 6   | 0   | c1(OOH)cHcHcHc1COCOCO(OH)             | c1(OO)cccc1C(=O)C(=O)C(=O)(O)           | 0.383E-09                  | 151.5                     |
| HPhKOA | 212.                         | 9   | 8   | 6   | 0   | c1(OOH)cHcHcHc1COCH(OH)CO(OH)         | c1(OO)cccc1C(=O)C(O)C(=O)(O)            | 0.184E-10                  | 167.3                     |
| HPhOA  | 184.                         | 8   | 8   | 5   | 0   | c1(OOH)cHcHcHc1CH(OH)CO(OH)           | c1(OO)cccc1C(O)C(=O)(O)                 | 0.101E-08                  | 148.8                     |
| HPhOUA | 196.                         | 9   | 8   | 5   | 0   | c1(OOH)cHcHcHc1CdH=CdHCO(OH)          | c1(OO)cccc1C(O)=CC(=O)(O)               | 0.791E-10                  | 160.7                     |
| HPhUA  | 180.                         | 9   | 8   | 4   | 0   | c1(OOH)cHcHcHc1CdH=CdHCO(OH)          | c1(OO)cccc1C=CC(=O)(O)                  | 0.131E-07                  | 135.2                     |
| NaH    | 160.                         | 10  | 8   | 2   | 0   | c12cHcHcHc1cHcHc2(OOH)                | c12ccccc1cccc2(OO)                      | 0.842E-07                  | 122.8                     |
| NaHKON | 255.                         | 10  | 9   | 7   | 1   | c12cHcHcHc1CH(ONO2)CH(OOH)CH(OH)C2O   | c12ccccc1C(ON(=O)=O)C(OO)C(O)C2=O       | 0.641E-09                  | 149.5                     |
| NaHO   | 176.                         | 10  | 8   | 3   | 0   | c12cHcHcHc1cHcHc(OOH)c2(OH)           | c12ccccc1ccc(OO)c2(O)                   | 0.365E-09                  | 149.1                     |
| NaHOOK | 210.                         | 10  | 10  | 5   | 0   | c12cHcHcHc1COCH(OH)CH(OOH)C2H(OH)     | c12ccccc1C(=O)C(O)C(OO)C2(O)            | 0.742E-09                  | 149.5                     |
| NaKK   | 158.                         | 10  | 6   | 2   | 0   | c12cHcHcHc1CdH=CdHCO2O                | c12ccccc1C=CC(=O)C2=O                   | 0.394E-02                  | 72.9                      |
| NaKKON | 237.                         | 10  | 7   | 6   | 1   | c12cHcHcHc1CH(ONO2)COCH(OH)C2O        | c12ccccc1C(ON(=O)=O)C(=O)C(O)C2=O       | 0.146E-06                  | 122.8                     |
| NaNKON | 284.                         | 10  | 8   | 8   | 2   | c12cHcHcHc1CH(ONO2)CH(ONO2)CH(OH)C2O  | c12ccccc1C(ON(=O)=O)C(ON(=O)=O)C(O)C2=O | 0.107E-07                  | 135.7                     |
| NaNOOK | 239.                         | 10  | 9   | 6   | 1   | c12cHcHcHc1COCH(OH)CH(ONO2)C2H(OH)    | c12ccccc1C(=O)C(O)C(ON(=O)=O)C2(O)      | 0.129E-07                  | 135.7                     |
| NaO    | 144.                         | 10  | 8   | 1   | 0   | c12cHcHcHc1cHcHc2(OH)                 | c12ccccc1cccc2(O)                       | 0.600E-05                  | 102.0                     |
| NaOHBP | 242.                         | 10  | 10  | 7   | 0   | c12cHcHcHc1CH(OOH)C3HCH(OH)C2H-O--O3- | c12ccccc1C(OO)C3C(O)C2O03               | 0.231E-04                  | 102.2                     |

| Name     | MW<br>(g mol <sup>-1</sup> ) | nbC | nbH | nbO | nbN | Chem code (GECKO-A)                            | Smile code                           | P <sup>sat</sup><br>(torr) | ΔH <sup>vap</sup><br>(kJ) |
|----------|------------------------------|-----|-----|-----|-----|------------------------------------------------|--------------------------------------|----------------------------|---------------------------|
| NaOHort  | 178.                         | 10  | 10  | 3   | 0   | c12cHcHcHcHc1CdH=CdHCH(OOH)C2H(OH)             | c12cccc1C=CC(OO)C2(O)                | 0.221E-05                  | 111.0                     |
| NaOHpar  | 178.                         | 10  | 10  | 3   | 0   | c12cHcHcHcHc1CH(OOH)CdH=CdHC2H(OH)             | c12cccc1C(OO)C=CC2(O)                | 0.221E-05                  | 111.0                     |
| NaOKBp   | 224.                         | 10  | 8   | 6   | 0   | c12cHcHcHcHc1COC3HCH(OH)C2H-O--O3-             | c12cccc1C(=O)C3C(O)C2O03             | 0.296E-02                  | 78.2                      |
| NaOKKH   | 208.                         | 10  | 8   | 5   | 0   | c12cHcHcHcHc1CH(OH)CH(OOH)COC2O                | c12cccc1C(O)C(OO)C(=O)C2=O           | 0.974E-08                  | 135.9                     |
| NaOKKK   | 190.                         | 10  | 6   | 4   | 0   | c12cHcHcHcHc1CH(OH)COCOC2O                     | c12cccc1C(O)C(=O)C(=O)C2=O           | 0.188E-05                  | 110.1                     |
| NaOKKN   | 237.                         | 10  | 7   | 6   | 1   | c12cHcHcHcHc1CH(OH)CH(ONO2)COC2O               | c12cccc1C(O)C(ON(=O)=O)C(=O)C2=O     | 0.146E-06                  | 122.8                     |
| NaOKON   | 239.                         | 10  | 9   | 6   | 1   | c12cHcHcHcHc1CH(ONO2)CH(OH)CH(OH)C2O           | c12cccc1C(ON(=O)=O)C(O)C(O)C2=O      | 0.129E-07                  | 135.7                     |
| NaOKort  | 160.                         | 10  | 8   | 2   | 0   | c12cHcHcHcHc1CdH=CdHCH(OH)C2O                  | c12cccc1C=CC(O)C2=O                  | 0.607E-03                  | 83.4                      |
| NaOKpar  | 160.                         | 10  | 8   | 2   | 0   | c12cHcHcHcHc1COCdH=CdHC2H(OH)                  | c12cccc1C(=O)C=CC2(O)                | 0.448E-03                  | 84.5                      |
| NaONBp   | 271.                         | 10  | 9   | 8   | 1   | c12cHcHcHcHc1CH(ONO2)C3HCH(OH)C2H-O--O3-       | c12cccc1C(ON(=O)=O)C3C(O)C2O03       | 0.122E-03                  | 94.3                      |
| NaONort  | 207.                         | 10  | 9   | 4   | 1   | c12cHcHcHcHc1CdH=CdHCH(ONO2)C2H(OH)            | c12cccc1C=CC(ON(=O)=O)C2(O)          | 0.229E-04                  | 100.3                     |
| NaONpar  | 207.                         | 10  | 9   | 4   | 1   | c12cHcHcHcHc1CH(ONO2)CdH=CdHC2H(OH)            | c12cccc1C(ON(=O)=O)C=CC2(O)          | 0.229E-04                  | 100.3                     |
| NaOO     | 160.                         | 10  | 8   | 2   | 0   | c12cHcHcHcHc1cHcHc(OH)c2(OH)                   | c12cccc1ccc(O)c2(O)                  | 0.398E-07                  | 125.8                     |
| NaOOBp   | 226.                         | 10  | 10  | 6   | 0   | c12cHcHcHcHc1CH(OH)C3HCH(OH)C2H-O--O3-         | c12cccc1C(O)C3C(O)C2O03              | 0.317E-03                  | 90.9                      |
| NaOOHBp  | 258.                         | 10  | 10  | 8   | 0   | c12cHcHcHcHc1CH(OOH)C3HCH(OH)C2(OH)-O--O3-     | c12cccc1C(OO)C3C(O)C2(O)O03          | 0.313E-06                  | 123.5                     |
| NaOOHort | 194.                         | 10  | 10  | 4   | 0   | c12cHcHcHcHc1CH(OH)CH(OOH)CdH=Cd2(OH)          | c12cccc1C(O)C(OO)C=C2(O)             | 0.217E-07                  | 134.2                     |
| NaOOK    | 176.                         | 10  | 8   | 3   | 0   | c12cHcHcHcHc1Cd(OH)=CdHCH(OH)C2O               | c12cccc1C(O)=CC(O)C2=O               | 0.705E-05                  | 106.0                     |
| NaOOKBp  | 240.                         | 10  | 8   | 7   | 0   | c12cHcHcHcHc1COC3HCH(OH)C2(OH)-O--O3-          | c12cccc1C(=O)C3C(O)C2(O)O03          | 0.533E-04                  | 98.4                      |
| NaOOKK   | 192.                         | 10  | 8   | 4   | 0   | c12cHcHcHcHc1COCH(OH)COC2H(OH)                 | c12cccc1C(=O)C(O)C(=O)C2(O)          | 0.191E-06                  | 122.3                     |
| NaOOKort | 176.                         | 10  | 8   | 3   | 0   | c12cHcHcHcHc1CH(OH)COCdH=Cd2(OH)               | c12cccc1C(O)C(=O)C=C2(O)             | 0.317E-05                  | 109.7                     |
| NaOONBp  | 287.                         | 10  | 9   | 9   | 1   | c12cHcHcHcHc1CH(ONO2)C3HCH(OH)C2(OH)-O--O3-    | c12cccc1C(ON(=O)=O)C3C(O)C2(O)O03    | 0.193E-05                  | 114.4                     |
| NaOONort | 223.                         | 10  | 9   | 5   | 1   | c12cHcHcHcHc1CH(OH)CH(ONO2)CdH=Cd2(OH)         | c12cccc1C(O)C(ON(=O)=O)C=C2(O)       | 0.261E-06                  | 122.2                     |
| NaOOO    | 176.                         | 10  | 8   | 3   | 0   | c12cHcHcHcHc1cHc(OH)c(OH)c2(OH)                | c12cccc1cc(O)c(O)c2(O)               | 0.183E-09                  | 152.4                     |
| NaOOOBp  | 242.                         | 10  | 10  | 7   | 0   | c12cHcHcHcHc1CH(OH)C3HCH(OH)C2(OH)-O--O3-      | c12cccc1C(O)C3C(O)C2(O)O03           | 0.564E-05                  | 110.9                     |
| NaOOOHBp | 274.                         | 10  | 10  | 9   | 0   | c12cHcHcHcHc1C(OH)(OOH)C3HCH(OH)C2(OH)-O--O3-  | c12cccc1C(O)(OO)C3C(O)C2(O)O03       | 0.346E-08                  | 145.9                     |
| NaOOOK   | 194.                         | 10  | 10  | 4   | 0   | c12cHcHcHcHc1COCH(OH)CH(OH)C2H(OH)             | c12cccc1C(=O)C(O)C(O)C2(O)           | 0.180E-07                  | 134.9                     |
| NaOOONBp | 303.                         | 10  | 9   | 10  | 1   | c12cHcHcHcHc1C(OH)(ONO2)C3HCH(OH)C2(OH)-O--O3- | c12cccc1C(O)(ON(=O)=O)C3C(O)C2(O)O03 | 0.284E-07                  | 135.6                     |
| NaOOOObp | 258.                         | 10  | 10  | 8   | 0   | c12cHcHcHcHc1C(OH)(OH)C3HCH(OH)C2(OH)-O--O3-   | c12cccc1C(O)(O)C3C(O)C2(O)O03        | 0.316E-04                  | 103.7                     |
| NaOOOort | 178.                         | 10  | 10  | 3   | 0   | c12cHcHcHcHc1CH(OH)CH(OH)CdH=Cd2(OH)           | c12cccc1C(O)C(O)C=C2(O)              | 0.493E-06                  | 120.3                     |

| Name     | MW<br>(g mol <sup>-1</sup> ) | nbC | nbH | nbO | nbN | Chem code (GECKO-A)                         | Smile code                            | P <sup>sat</sup><br>(torr) | ΔH <sup>vap</sup><br>(kJ) |
|----------|------------------------------|-----|-----|-----|-----|---------------------------------------------|---------------------------------------|----------------------------|---------------------------|
| NaOOort  | 162.                         | 10  | 10  | 2   | 0   | c12cHcHcHcHc1CdH=CdHCH(OH)C2H(OH)           | c12cccc1C=CC(O)C2(O)                  | 0.371E-04                  | 98.6                      |
| NaOOpAr  | 162.                         | 10  | 10  | 2   | 0   | c12cHcHcHcHc1CH(OH)CdH=CdHC2H(OH)           | c12cccc1C(O)C=CC2(O)                  | 0.371E-04                  | 98.6                      |
| NaOPEN   | 160.                         | 10  | 8   | 2   | 0   | CHOc1cHcHcHcHc1CdH=CdHCHO                   | C(=O)c1cccc1C=CC=O                    | 0.271E-03                  | 86.5                      |
| NaOPENOL | 176.                         | 10  | 8   | 3   | 0   | CHOc1cHcHcHcHc1Cd(OH)=CdHCHO                | C(=O)c1cccc1C(O)=CC=O                 | 0.461E-05                  | 107.0                     |
| NAPH     | 128.                         | 10  | 8   | 0   | 0   | c12cHcHcHcHc1cHcHcHc2H                      | c12cccc1cccc2                         | 0.503E-03                  | 81.0                      |
| NaQuin   | 158.                         | 10  | 6   | 2   | 0   | c12cHcHcHcHc1COcDh=CdHC2O                   | c12cccc1C(=O)C=CC2=O                  | 0.566E-02                  | 70.9                      |
| NaV      | 173.                         | 10  | 7   | 2   | 1   | c12cHcHcHcHc1cHcHcHc2(NO2)                  | c12cccc1cccc2(N(=O)=O)                | 0.415E-05                  | 102.8                     |
| NaVO     | 189.                         | 10  | 7   | 3   | 1   | c12cHcHcHcHc1cHcHc(OH)c2(NO2)               | c12cccc1ccc(O)c2(N(=O)=O)             | 0.348E-07                  | 126.1                     |
| NaVOO    | 205.                         | 10  | 7   | 4   | 1   | c12cHcHcHcHc1cHc(OH)c(NO2)c2(OH)            | c12cccc1cc(O)c(N(=O)=O)c2(O)          | 0.176E-09                  | 152.1                     |
| OHPPhUA  | 196.                         | 9   | 8   | 5   | 0   | c1(OOH)cHcHcHc(OH)c1CdH=CdHCO(OH)           | c1(OO)cccc(O)c1C=CC(=O)(O)            | 0.528E-10                  | 161.5                     |
| ONaHOOK  | 226.                         | 10  | 10  | 6   | 0   | c12cHcHcHc(OH)c1COCH(OH)CH(OOH)C2H(OH)      | c12cccc(O)c1C(=O)C(O)C(OO)C2(O)       | 0.212E-11                  | 177.7                     |
| ONaNOOK  | 255.                         | 10  | 9   | 7   | 1   | c12cHcHcHc(OH)c1COCH(OH)CH(ONO2)C2H(OH)     | c12cccc(O)c1C(=O)C(O)C(ON(=O)=O)C2(O) | 0.569E-10                  | 161.7                     |
| ONaO     | 160.                         | 10  | 8   | 2   | 0   | c12cHcHcHc(OH)c1cHcHcHc2(OH)                | c12cccc(O)c1cccc2(O)                  | 0.398E-07                  | 125.8                     |
| ONaOHBp  | 258.                         | 10  | 10  | 8   | 0   | c12cHcHcHc(OH)c1CH(OOH)C3HCH(OH)C2H-O--O3-  | c12cccc(O)c1C(OO)C3C(O)C2O03          | 0.249E-06                  | 123.3                     |
| ONaOHort | 194.                         | 10  | 10  | 4   | 0   | c12cHcHcHc(OH)c1CdH=CdHCH(OOH)C2H(OH)       | c12cccc(O)c1C=CC(OO)C2(O)             | 0.147E-07                  | 134.8                     |
| ONaOHpar | 194.                         | 10  | 10  | 4   | 0   | c12cHcHcHc(OH)c1CH(OOH)CdH=CdHC2H(OH)       | c12cccc(O)c1C(OO)C=CC2(O)             | 0.147E-07                  | 134.8                     |
| ONaOKBp  | 240.                         | 10  | 8   | 7   | 0   | c12cHcHcHc(OH)c1COC3HCH(OH)C2H-O--O3-       | c12cccc(O)c1C(=O)C3C(O)C2O03          | 0.434E-04                  | 98.0                      |
| ONaOKort | 176.                         | 10  | 8   | 3   | 0   | c12cHcHcHc(OH)c1CdH=CdHCOC2H(OH)            | c12cccc(O)c1C=CC(=O)C2(O)             | 0.225E-05                  | 109.9                     |
| ONaOKpar | 176.                         | 10  | 8   | 3   | 0   | c12cHcHcHc(OH)c1COCdH=CdHC2H(OH)            | c12cccc(O)c1C(=O)C=CC2(O)             | 0.357E-05                  | 107.4                     |
| ONaONBp  | 287.                         | 10  | 9   | 9   | 1   | c12cHcHcHc(OH)c1CH(ONO2)C3HCH(OH)C2H-O--O3- | c12cccc(O)c1C(ON(=O)=O)C3C(O)C2O03    | 0.165E-05                  | 113.9                     |
| ONaONort | 223.                         | 10  | 9   | 5   | 1   | c12cHcHcHc(OH)c1CdH=CdHCH(ONO2)C2H(OH)      | c12cccc(O)c1C=CC(ON(=O)=O)C2(O)       | 0.199E-06                  | 122.1                     |
| ONaONpar | 223.                         | 10  | 9   | 5   | 1   | c12cHcHcHc(OH)c1CH(ONO2)CdH=CdHC2H(OH)      | c12cccc(O)c1C(ON(=O)=O)C=CC2(O)       | 0.199E-06                  | 122.1                     |
| ONaOOBp  | 242.                         | 10  | 10  | 7   | 0   | c12cHcHcHc(OH)c1CH(OH)C3HCH(OH)C2H-O--O3-   | c12cccc(O)c1C(O)C3C(O)C2O03           | 0.421E-05                  | 110.9                     |
| ONaOOKK  | 208.                         | 10  | 8   | 5   | 0   | c12cHcHcHc(OH)c1COCH(OH)COC2H(OH)           | c12cccc(O)c1C(=O)C(O)C(=O)C2(O)       | 0.887E-09                  | 147.9                     |
| ONaOOOK  | 210.                         | 10  | 10  | 5   | 0   | c12cHcHcHc(OH)c1COCH(OH)CH(OH)C2H(OH)       | c12cccc(O)c1C(=O)C(O)C(O)C2(O)        | 0.630E-10                  | 161.8                     |
| ONaOOort | 178.                         | 10  | 10  | 3   | 0   | c12cHcHcHc(OH)c1CdH=CdHCH(OH)C2H(OH)        | c12cccc(O)c1C=CC(O)C2(O)              | 0.308E-06                  | 121.0                     |
| ONaOOpAr | 178.                         | 10  | 10  | 3   | 0   | c12cHcHcHc(OH)c1CH(OH)CdH=CdHC2H(OH)        | c12cccc(O)c1C(O)C=CC2(O)              | 0.308E-06                  | 121.0                     |
| ONaOPEN  | 176.                         | 10  | 8   | 3   | 0   | CHOc1cHcHcHc(OH)c1CdH=CdHCHO                | C(=O)c1cccc(O)c1C=CC=O                | 0.348E-05                  | 106.9                     |
| ONaQuin  | 174.                         | 10  | 6   | 3   | 0   | c12cHcHcHc(OH)c1COCdH=CdHC2O                | c12cccc(O)c1C(=O)C=CC2=O              | 0.526E-04                  | 93.0                      |

| Name     | MW<br>(g mol <sup>-1</sup> ) | nbC | nbH | nbO | nbN | Chem code (GECKO-A)                 | Smile code                         | P <sup>sat</sup><br>(torr) | ΔH <sup>vap</sup><br>(kJ) |
|----------|------------------------------|-----|-----|-----|-----|-------------------------------------|------------------------------------|----------------------------|---------------------------|
| OOPhUA   | 180.                         | 9   | 8   | 4   | 0   | c1(OH)cHcHcHc(OH)c1CdH=CdHCO(OH)    | c1(O)cccc(O)c1C=CC(=O)(O)          | 0.715E-08                  | 137.8                     |
| OPh      | 94.                          | 6   | 6   | 1   | 0   | c1HcHcHcHc1(OH)                     | c1cccc1(O)                         | 0.153E+01                  | 50.9                      |
| OPhA     | 138.                         | 7   | 6   | 3   | 0   | CO(OH)c1cHcHcHc1(OH)                | C(=O)(O)c1cccc1(O)                 | 0.709E-04                  | 95.7                      |
| OPhAD    | 166.                         | 8   | 6   | 4   | 0   | CHOc1cHcHcHc(OH)c1CO(OH)            | C(=O)c1cccc(O)c1C(=O)(O)           | 0.752E-06                  | 115.6                     |
| OPhAUA   | 208.                         | 10  | 8   | 5   | 0   | CO(OH)c1cHcHcHc(OH)c1CdH=CdHCO(OH)  | C(=O)(O)c1cccc(O)c1C=CC(=O)(O)     | 0.538E-11                  | 172.4                     |
| OPhD     | 122.                         | 7   | 6   | 2   | 0   | CHOc1cHcHcHc(OH)c1H                 | C(=O)c1cccc(O)c1                   | 0.348E-01                  | 66.3                      |
| OPhDCA   | 180.                         | 9   | 8   | 4   | 0   | CHOc1cHcHcHc(OH)c1CH2CO(OH)         | C(=O)c1cccc(O)c1CC(=O)(O)          | 0.327E-06                  | 119.6                     |
| OPhDCD   | 164.                         | 9   | 8   | 3   | 0   | CHOc1cHcHcHc(OH)c1CH2CHO            | C(=O)c1cccc(O)c1CC=O               | 0.624E-04                  | 94.3                      |
| OPhDD    | 150.                         | 8   | 6   | 3   | 0   | CHOc1cHcHcHc(OH)c1CHO               | C(=O)c1cccc(O)c1C=O                | 0.144E-03                  | 90.0                      |
| OPhDHOD  | 226.                         | 10  | 10  | 6   | 0   | CHOc1cHcHcHc(OH)c1CH(OOH)CH(OH)CHO  | C(=O)c1cccc(O)c1C(OO)C(O)C=O       | 0.457E-10                  | 162.1                     |
| OPhDKOD  | 208.                         | 10  | 8   | 5   | 0   | CHOc1cHcHcHc(OH)c1COCH(OH)CHO       | C(=O)c1cccc(O)c1C(=O)C(O)C=O       | 0.347E-07                  | 129.4                     |
| OPhDNOD  | 255.                         | 10  | 9   | 7   | 1   | CHOc1cHcHcHc(OH)c1CH(ONO2)CH(OH)CHO | C(=O)c1cccc(O)c1C(ON(=O)=O)C(O)C=O | 0.779E-09                  | 148.4                     |
| OPhDOOD  | 210.                         | 10  | 10  | 5   | 0   | CHOc1cHcHcHc(OH)c1CH(OH)CH(OH)CHO   | C(=O)c1cccc(O)c1C(O)C(O)C=O        | 0.110E-08                  | 147.3                     |
| OPhKA    | 166.                         | 8   | 6   | 4   | 0   | c1(OH)cHcHcHc1COCO(OH)              | c1(O)cccc1C(=O)C(=O)(O)            | 0.267E-05                  | 109.8                     |
| OPhKKA   | 194.                         | 9   | 6   | 5   | 0   | c1(OH)cHcHcHc1COCOCO(OH)            | c1(O)cccc1C(=O)C(=O)C(=O)(O)       | 0.420E-07                  | 128.8                     |
| OPhKOA   | 196.                         | 9   | 8   | 5   | 0   | c1(OH)cHcHcHc1COCH(OH)CO(OH)        | c1(O)cccc1C(=O)C(O)C(=O)(O)        | 0.266E-08                  | 143.2                     |
| OPhOA    | 168.                         | 8   | 8   | 4   | 0   | c1(OH)cHcHcHc1CH(OH)CO(OH)          | c1(O)cccc1C(O)C(=O)(O)             | 0.122E-06                  | 126.1                     |
| OPhODKD  | 208.                         | 10  | 8   | 5   | 0   | CHOCOc1cHcHcHc(OH)c1CH(OH)CHO       | O=CC(=O)c1cccc(O)c1C(O)C=O         | 0.280E-07                  | 130.6                     |
| OPhOUA   | 180.                         | 9   | 8   | 4   | 0   | c1(OH)cHcHcHc1Cd(OH)=CdHCO(OH)      | c1(O)cccc1C(O)=CC(=O)(O)           | 0.109E-07                  | 137.1                     |
| OPhUA    | 164.                         | 9   | 8   | 3   | 0   | c1(OH)cHcHcHc1CdH=CdHCO(OH)         | c1(O)cccc1C=CC(=O)(O)              | 0.118E-05                  | 113.8                     |
| OPhUAnhy | 190.                         | 10  | 6   | 4   | 0   | c12cHcHcHc(OH)c1CdH=CdHCO-O-C2O     | c12cccc(O)c1C=CC(=O)OC2=O          | 0.147E-07                  | 130.8                     |
| PhA      | 122.                         | 7   | 6   | 2   | 0   | c1HcHcHcHc1CO(OH)                   | c1cccc1C(=O)(O)                    | 0.892E-02                  | 74.1                      |
| PhAA     | 166.                         | 8   | 6   | 4   | 0   | CO(OH)c1cHcHcHc1CO(OH)              | C(=O)(O)c1cccc1C(=O)(O)            | 0.471E-06                  | 117.6                     |
| PhAD     | 150.                         | 8   | 6   | 3   | 0   | CHOc1cHcHcHc1CO(OH)                 | C(=O)c1cccc1C(=O)(O)               | 0.117E-03                  | 92.3                      |
| PhAKD    | 178.                         | 9   | 6   | 4   | 0   | CHOCOc1cHcHcHc1CO(OH)               | O=CC(=O)c1cccc1C(=O)(O)            | 0.397E-05                  | 107.3                     |
| PhAKOA   | 224.                         | 10  | 8   | 6   | 0   | CO(OH)c1cHcHcHc1COCH(OH)CO(OH)      | C(=O)(O)c1cccc1C(=O)C(O)C(=O)(O)   | 0.145E-11                  | 179.5                     |
| PhAKOD   | 208.                         | 10  | 8   | 5   | 0   | CO(OH)c1cHcHcHc1COCH(OH)CHO         | C(=O)(O)c1cccc1C(=O)C(O)C=O        | 0.414E-08                  | 140.5                     |
| PhAND    | 225.                         | 9   | 7   | 6   | 1   | CO(OH)c1cHcHcHc1CH(ONO2)CHO         | C(=O)(O)c1cccc1C(ON(=O)=O)C=O      | 0.119E-06                  | 124.7                     |
| PhAnhy   | 148.                         | 8   | 4   | 3   | 0   | c12cHcHcHc1CO-O-C2O                 | c12cccc1C(=O)OC2=O                 | 0.153E-04                  | 97.6                      |

| Name    | MW<br>(g mol <sup>-1</sup> ) | nbC | nbH | nbO | nbN | Chem code (GECKO-A)                  | Smile code                           | P <sup>sat</sup><br>(torr) | ΔH <sup>vap</sup><br>(kJ) |
|---------|------------------------------|-----|-----|-----|-----|--------------------------------------|--------------------------------------|----------------------------|---------------------------|
| PhAOCA  | 210.                         | 10  | 10  | 5   | 0   | CO(OH)c1cHcHcHcHc1CH(OH)CH2CO(OH)    | C(=O)(O)c1cccc1C(O)CC(=O)(O)         | 0.294E-10                  | 165.3                     |
| PhAOCD  | 194.                         | 10  | 10  | 4   | 0   | CO(OH)c1cHcHcHcHc1CH(OH)CH2CHO       | C(=O)(O)c1cccc1C(O)CC=O              | 0.426E-07                  | 130.0                     |
| PhAOCG  | 226.                         | 10  | 10  | 6   | 0   | CO(OH)c1cHcHcHcHc1CH(OH)CH2CO(OOH)   | C(=O)(O)c1cccc1C(O)CC(=O)(OO)        | 0.249E-09                  | 155.2                     |
| PhAOCP  | 271.                         | 10  | 9   | 8   | 1   | CO(OH)c1cHcHcHcHc1CH(OH)CH2CO(OON02) | C(=O)(O)c1cccc1C(O)CC(=O)(OON(=O)=O) | 0.233E-08                  | 143.9                     |
| PhAOD   | 180.                         | 9   | 8   | 4   | 0   | CO(OH)c1cHcHcHcHc1CH(OH)CHO          | C(=O)(O)c1cccc1C(O)C=O               | 0.136E-06                  | 124.8                     |
| PhAOH   | 198.                         | 9   | 10  | 5   | 0   | CO(OH)c1cHcHcHcHc1CH(OH)CH2(OOH)     | C(=O)(O)c1cccc1C(O)C(OO)             | 0.227E-09                  | 155.6                     |
| PhAOKA  | 224.                         | 10  | 8   | 6   | 0   | CO(OH)CH(OH)c1cHcHcHcHc1COCO(OH)     | C(=O)(O)C(O)c1cccc1C(=O)C(=O)(O)     | 0.145E-11                  | 179.5                     |
| PhAOKD  | 208.                         | 10  | 8   | 5   | 0   | CHOC0c1cHcHcHcHc1CH(OH)CO(OH)        | O=CC(=O)c1cccc1C(O)C(=O)(O)          | 0.414E-08                  | 140.5                     |
| PhAON   | 227.                         | 9   | 9   | 6   | 1   | CO(OH)c1cHcHcHcHc1CH(OH)CH2(ON02)    | C(=O)(O)c1cccc1C(O)C(ON(=O)=O)       | 0.430E-08                  | 141.5                     |
| PhA00   | 182.                         | 9   | 10  | 4   | 0   | CO(OH)c1cHcHcHcHc1CH(OH)CH2(OH)      | C(=O)(O)c1cccc1C(O)C(O)              | 0.402E-08                  | 142.1                     |
| PhA00A  | 212.                         | 9   | 8   | 6   | 0   | CO(OH)c1cHcHcHcHc1C(OH)(OH)CO(OH)    | C(=O)(O)c1cccc1C(O)(O)C(=O)(O)       | 0.131E-08                  | 148.0                     |
| PhA0UA  | 208.                         | 10  | 8   | 5   | 0   | CO(OH)c1cHcHcHcHc1Cd(OH)=CdHCO(OH)   | C(=O)(O)c1cccc1C(O)=CC(=O)(O)        | 0.758E-11                  | 171.7                     |
| PhA0UD  | 192.                         | 10  | 8   | 4   | 0   | CO(OH)c1cHcHcHcHc1Cd(OH)=CdHCHO      | C(=O)(O)c1cccc1C(O)=CC=O             | 0.131E-07                  | 135.5                     |
| PhAUA   | 192.                         | 10  | 8   | 4   | 0   | CO(OH)c1cHcHcHcHc1CdH=CdHCO(OH)      | C(=O)(O)c1cccc1C=CC(=O)(O)           | 0.566E-08                  | 138.1                     |
| PhAUD1  | 176.                         | 10  | 8   | 3   | 0   | CO(OH)c1cHcHcHcHc1CdH=CdHCHO         | C(=O)(O)c1cccc1C=CC=O                | 0.189E-05                  | 110.8                     |
| PhAUD2  | 176.                         | 10  | 8   | 3   | 0   | CHOc1cHcHcHcHc1CdH=CdHCO(OH)         | C(=O)c1cccc1C=CC(=O)(O)              | 0.227E-05                  | 109.8                     |
| PhD     | 106.                         | 7   | 6   | 1   | 0   | c1HcHcHcHc1CHO                       | c1cccc1C=O                           | 0.144E+01                  | 49.7                      |
| PhDCA   | 164.                         | 9   | 8   | 3   | 0   | CHOc1cHcHcHcHc1CH2CO(OH)             | C(=O)c1cccc1CC(=O)(O)                | 0.501E-04                  | 96.3                      |
| PhDCD   | 148.                         | 9   | 8   | 2   | 0   | CHOc1cHcHcHcHc1CH2CHO                | C(=O)c1cccc1CC=O                     | 0.386E-02                  | 75.3                      |
| PhDD    | 134.                         | 8   | 6   | 2   | 0   | CHOc1cHcHcHcHc1CHO                   | C(=O)c1cccc1C=O                      | 0.842E-02                  | 71.3                      |
| PhDHOD  | 210.                         | 10  | 10  | 5   | 0   | CHOc1cHcHcHcHc1CH(OOH)CH(OH)CHO      | C(=O)c1cccc1C(OO)C(O)C=O             | 0.854E-08                  | 137.1                     |
| PhDKA   | 178.                         | 9   | 6   | 4   | 0   | CHOc1cHcHcHcHc1COCO(OH)              | C(=O)c1cccc1C(=O)C(=O)(O)            | 0.473E-05                  | 106.2                     |
| PhDKHD  | 208.                         | 10  | 8   | 5   | 0   | CHOc1cHcHcHcHc1COCH(OOH)CHO          | C(=O)c1cccc1C(=O)C(OO)C=O            | 0.288E-06                  | 118.9                     |
| PhDKKD  | 190.                         | 10  | 6   | 4   | 0   | CHOc1cHcHcHcHc1COCOCHO               | C(=O)c1cccc1C(=O)C(=O)C=O            | 0.429E-04                  | 94.4                      |
| PhDKND  | 237.                         | 10  | 7   | 6   | 1   | CHOc1cHcHcHcHc1COCH(ON02)CHO         | C(=O)c1cccc1C(=O)C(ON(=O)=O)C=O      | 0.272E-05                  | 108.0                     |
| PhDKOD  | 192.                         | 10  | 8   | 4   | 0   | CHOc1cHcHcHcHc1COCH(OH)CHO           | C(=O)c1cccc1C(=O)C(O)C=O             | 0.438E-05                  | 106.6                     |
| PhDNOD  | 239.                         | 10  | 9   | 6   | 1   | CHOc1cHcHcHcHc1CH(ON02)CH(OH)CHO     | C(=O)c1cccc1C(ON(=O)=O)C(O)C=O       | 0.607E-07                  | 127.7                     |
| PhDOOD  | 194.                         | 10  | 10  | 4   | 0   | CHOc1cHcHcHcHc1CH(OH)CH(OH)CHO       | C(=O)c1cccc1C(O)C(O)C=O              | 0.166E-06                  | 123.6                     |
| PhDOOD1 | 180.                         | 9   | 8   | 4   | 0   | CHOc1cHcHcHcHc1C(OH)(OH)CHO          | C(=O)c1cccc1C(O)(O)C=O               | 0.229E-03                  | 90.0                      |

| Name     | MW<br>(g mol <sup>-1</sup> ) | nbC | nbH | nbO | nbN | Chem code (GECKO-A)                 | Smile code                        | P <sup>sat</sup><br>(torr) | ΔH <sup>vap</sup><br>(kJ) |
|----------|------------------------------|-----|-----|-----|-----|-------------------------------------|-----------------------------------|----------------------------|---------------------------|
| PhDOOHD  | 226.                         | 10  | 10  | 6   | 0   | CHOc1cHcHcHcHc1C(OH)(OH)CH(OOH)CHO  | C(=O)c1cccc1C(O)(O)C(OO)C=O       | 0.731E-07                  | 127.5                     |
| PhDOOKD  | 208.                         | 10  | 8   | 5   | 0   | CHOc1cHcHcHcHc1C(OH)(OH)COCHO       | C(=O)c1cccc1C(O)(O)C(=O)C=O       | 0.165E-04                  | 101.3                     |
| PhDOOND  | 255.                         | 10  | 9   | 7   | 1   | CHOc1cHcHcHcHc1C(OH)(OH)CH(ONO2)CHO | C(=O)c1cccc1C(O)(O)C(ON(=O)=O)C=O | 0.396E-06                  | 119.4                     |
| PhDOOOD  | 210.                         | 10  | 10  | 5   | 0   | CHOc1cHcHcHcHc1C(OH)(OH)CH(OH)CHO   | C(=O)c1cccc1C(O)(O)C(O)C=O        | 0.128E-05                  | 114.7                     |
| PhEstH   | 166.                         | 8   | 6   | 4   | 0   | c12cHcHcHcHc1CO-O-C2H(OOH)          | c12cccc1C(=O)OC2(OO)              | 0.702E-05                  | 102.4                     |
| PhEstO   | 150.                         | 8   | 6   | 3   | 0   | c12cHcHcHcHc1CO-O-C2H(OH)           | c12cccc1C(=O)OC2(O)               | 0.988E-04                  | 90.4                      |
| PhGA     | 182.                         | 8   | 6   | 5   | 0   | CO(OH)c1cHcHcHcHc1CO(OOH)           | C(=O)(O)c1cccc1C(=O)(OO)          | 0.255E-05                  | 109.9                     |
| PhGD     | 166.                         | 8   | 6   | 4   | 0   | CHOc1cHcHcHcHc1CO(OOH)              | C(=O)c1cccc1C(=O)(OO)             | 0.492E-03                  | 85.7                      |
| PhGKOA   | 240.                         | 10  | 8   | 7   | 0   | CO(OH)c1cHcHcHcHc1COCH(OH)CO(OOH)   | C(=O)(O)c1cccc1C(=O)C(O)C(=O)(OO) | 0.137E-10                  | 168.7                     |
| PhGKOD   | 224.                         | 10  | 8   | 6   | 0   | CO(OOH)c1cHcHcHcHc1COCH(OH)CHO      | C(=O)(OO)c1cccc1C(=O)C(O)C=O      | 0.262E-07                  | 131.8                     |
| PhGND    | 241.                         | 9   | 7   | 7   | 1   | CO(OOH)c1cHcHcHcHc1CH(ONO2)CHO      | C(=O)(OO)c1cccc1C(ON(=O)=O)C=O    | 0.577E-06                  | 117.2                     |
| PhGOCD   | 210.                         | 10  | 10  | 5   | 0   | CO(OOH)c1cHcHcHcHc1CH(OH)CH2CHO     | C(=O)(OO)c1cccc1C(O)CC=O          | 0.254E-06                  | 121.7                     |
| PhGOKA   | 240.                         | 10  | 8   | 7   | 0   | CO(OH)CH(OH)c1cHcHcHcHc1COCO(OOH)   | C(=O)(O)C(O)c1cccc1C(=O)C(=O)(OO) | 0.137E-10                  | 168.7                     |
| PhGOKD   | 224.                         | 10  | 8   | 6   | 0   | CHOCOc1cHcHcHcHc1CH(OH)CO(OOH)      | O=CC(=O)c1cccc1C(O)C(=O)(OO)      | 0.262E-07                  | 131.8                     |
| PhGOUA   | 224.                         | 10  | 8   | 6   | 0   | CO(OH)c1cHcHcHcHc1Cd(OH)=CdHCO(OOH) | C(=O)(O)c1cccc1C(O)=CC(=O)(OO)    | 0.703E-10                  | 161.1                     |
| PhGOUD   | 208.                         | 10  | 8   | 5   | 0   | CO(OOH)c1cHcHcHcHc1Cd(OH)=CdHCHO    | C(=O)(OO)c1cccc1C(O)=CC=O         | 0.846E-07                  | 126.8                     |
| PhGUA1   | 208.                         | 10  | 8   | 5   | 0   | CO(OH)c1cHcHcHcHc1CdH=CdHCO(OOH)    | C(=O)(O)c1cccc1C=CC(=O)(OO)       | 0.360E-07                  | 129.4                     |
| PhGUA2   | 208.                         | 10  | 8   | 5   | 0   | CO(OOH)c1cHcHcHcHc1CdH=CdHCO(OH)    | C(=O)(OO)c1cccc1C=CC(=O)(O)       | 0.360E-07                  | 129.4                     |
| PhGUD1   | 192.                         | 10  | 8   | 4   | 0   | CO(OOH)c1cHcHcHcHc1CdH=CdHCHO       | C(=O)(OO)c1cccc1C=CC=O            | 0.943E-05                  | 103.4                     |
| PhGUD2   | 192.                         | 10  | 8   | 4   | 0   | CHOc1cHcHcHcHc1CdH=CdHCO(OOH)       | C(=O)c1cccc1C=CC(=O)(OO)          | 0.112E-04                  | 102.3                     |
| PhKA     | 150.                         | 8   | 6   | 3   | 0   | c1HcHcHcHcHc1COCO(OH)               | c1cccc1C(=O)C(=O)(O)              | 0.404E-03                  | 86.4                      |
| PhKAKA   | 222.                         | 10  | 6   | 6   | 0   | CO(OH)COc1cHcHcHcHc1COCO(OH)        | C(=O)(O)C(=O)c1cccc1C(=O)C(=O)(O) | 0.631E-10                  | 160.0                     |
| PhKANhy  | 176.                         | 9   | 4   | 4   | 0   | c12cHcHcHcHc1COCO-O-C2O             | c12cccc1C(=O)C(=O)OC2=O           | 0.625E-06                  | 112.4                     |
| PhKD     | 134.                         | 8   | 6   | 2   | 0   | c1HcHcHcHcHc1COCHO                  | c1cccc1C(=O)C=O                   | 0.107E+00                  | 60.7                      |
| PhKDD    | 162.                         | 9   | 6   | 3   | 0   | CHOCOc1cHcHcHcHc1CHO                | O=CC(=O)c1cccc1C=O                | 0.128E-02                  | 79.2                      |
| PhKDKD   | 190.                         | 10  | 6   | 4   | 0   | CHOCOc1cHcHcHcHc1COCHO              | O=CC(=O)c1cccc1C(=O)C=O           | 0.551E-04                  | 93.2                      |
| PhKG     | 166.                         | 8   | 6   | 4   | 0   | c1HcHcHcHcHc1COCO(OOH)              | c1cccc1C(=O)C(=O)(OO)             | 0.149E-02                  | 80.4                      |
| PhKKAnhy | 204.                         | 10  | 4   | 5   | 0   | c12cHcHcHcHc1COCO-O-COC2O           | c12cccc1C(=O)C(=O)OC(=O)C2=O      | 0.786E-07                  | 121.8                     |
| PhKOA    | 180.                         | 9   | 8   | 4   | 0   | c1HcHcHcHcHc1COCH(OH)CO(OH)         | c1cccc1C(=O)C(O)C(=O)(O)          | 0.574E-06                  | 117.9                     |

| Name     | MW<br>(g mol <sup>-1</sup> ) | nbC | nbH | nbO | nbN | Chem code (GECKO-A)                 | Smile code                         | P <sup>sat</sup><br>(torr) | ΔH <sup>vap</sup><br>(kJ) |
|----------|------------------------------|-----|-----|-----|-----|-------------------------------------|------------------------------------|----------------------------|---------------------------|
| PhKOAnhy | 206.                         | 10  | 6   | 5   | 0   | c12cHcHcHcHc1COCH(OH)CO-O-C2O       | c12cccc1C(=O)C(O)C(=O)OC2=O        | 0.174E-08                  | 141.5                     |
| PhKOG    | 196.                         | 9   | 8   | 5   | 0   | c1HcHcHcHcHc1COCH(OH)CO(OOH)        | c1cccc1C(=O)C(O)C(=O)(OO)          | 0.300E-05                  | 110.3                     |
| PhKOEEst | 224.                         | 10  | 8   | 6   | 0   | c12cHcHcHcHc1COCH(OH)CH(OOH)-O-C2O  | c12cccc1C(=O)C(O)C(OO)OC2=O        | 0.132E-09                  | 155.6                     |
| PhKOOEst | 208.                         | 10  | 8   | 5   | 0   | c12cHcHcHcHc1COCH(OH)CH(OH)-O-C2O   | c12cccc1C(=O)C(O)C(O)OC2=O         | 0.274E-08                  | 141.3                     |
| PhKOP    | 241.                         | 9   | 7   | 7   | 1   | c1HcHcHcHcHc1COCH(OH)CO(OONO2)      | c1cccc1C(=O)C(O)C(=O)(OON(=O)=O)   | 0.218E-04                  | 99.6                      |
| PhKP     | 211.                         | 8   | 5   | 6   | 1   | c1HcHcHcHcHc1COCO(OONO2)            | c1cccc1C(=O)C(=O)(OON(=O)=O)       | 0.338E-02                  | 75.6                      |
| PhNA     | 197.                         | 8   | 7   | 5   | 1   | c1HcHcHcHcHc1CH(ONO2)CO(OH)         | c1cccc1C(ON(=O)=O)C(=O)(O)         | 0.124E-04                  | 103.9                     |
| PhNDKD   | 237.                         | 10  | 7   | 6   | 1   | CHOCO1cHcHcHcHc1CH(ONO2)CHO         | O=CC(=O)c1cccc1C(ON(=O)=O)C=O      | 0.223E-05                  | 109.2                     |
| PhNG     | 213.                         | 8   | 7   | 6   | 1   | c1HcHcHcHcHc1CH(ONO2)CO(OOH)        | c1cccc1C(ON(=O)=O)C(=O)(OO)        | 0.494E-04                  | 97.4                      |
| PhNP     | 258.                         | 8   | 6   | 8   | 2   | c1HcHcHcHcHc1CH(ONO2)CO(OONO2)      | c1cccc1C(ON(=O)=O)C(=O)(OON(=O)=O) | 0.186E-03                  | 89.9                      |
| PhOA     | 152.                         | 8   | 8   | 3   | 0   | c1HcHcHcHcHc1CH(OH)CO(OH)           | c1cccc1C(O)C(=O)(O)                | 0.182E-04                  | 103.1                     |
| PhOCA    | 166.                         | 9   | 10  | 3   | 0   | c1HcHcHcHcHc1CH(OH)CH2CO(OH)        | c1cccc1C(O)CC(=O)(O)               | 0.565E-05                  | 108.2                     |
| PhOCAnhy | 192.                         | 10  | 8   | 4   | 0   | c12cHcHcHcHc1CH(OH)CH2CO-O-C2O      | c12cccc1C(O)CC(=O)OC2=O            | 0.129E-07                  | 132.3                     |
| PhOCG    | 182.                         | 9   | 10  | 4   | 0   | c1HcHcHcHcHc1CH(OH)CH2CO(OOH)       | c1cccc1C(O)CC(=O)(OO)              | 0.277E-04                  | 100.9                     |
| PhOCHEst | 210.                         | 10  | 10  | 5   | 0   | c12cHcHcHcHc1CH(OH)CH2CH(OOH)-O-C2O | c12cccc1C(O)CC(OO)OC2=O            | 0.263E-08                  | 141.3                     |
| PhOCOESt | 194.                         | 10  | 10  | 4   | 0   | c12cHcHcHcHc1CH(OH)CH2CH(OH)-O-C2O  | c12cccc1C(O)CC(O)OC2=O             | 0.507E-07                  | 127.5                     |
| PhOCP    | 227.                         | 9   | 9   | 6   | 1   | c1HcHcHcHcHc1CH(OH)CH2CO(OONO2)     | c1cccc1C(O)CC(=O)(OON(=O)=O)       | 0.146E-03                  | 92.0                      |
| PhOD     | 136.                         | 8   | 8   | 2   | 0   | c1HcHcHcHcHc1CH(OH)CHO              | c1cccc1C(O)C=O                     | 0.956E-02                  | 73.7                      |
| PhODKD   | 192.                         | 10  | 8   | 4   | 0   | CHOCO1cHcHcHcHc1CH(OH)CHO           | O=CC(=O)c1cccc1C(O)C=O             | 0.366E-05                  | 107.7                     |
| PhOG     | 168.                         | 8   | 8   | 4   | 0   | c1HcHcHcHcHc1CH(OH)CO(OOH)          | c1cccc1C(O)C(=O)(OO)               | 0.889E-04                  | 95.9                      |
| PhOH     | 154.                         | 8   | 10  | 3   | 0   | c1HcHcHcHcHc1CH(OH)CH2(OOH)         | c1cccc1C(O)C(OO)                   | 0.428E-04                  | 98.3                      |
| PhOKAnhy | 206.                         | 10  | 6   | 5   | 0   | c12cHcHcHcHc1COCO-O-COC2H(OH)       | c12cccc1C(=O)C(=O)OC(=O)C2(O)      | 0.174E-08                  | 141.5                     |
| PhOKHEst | 224.                         | 10  | 8   | 6   | 0   | c12cHcHcHcHc1COCH(OOH)-O-COC2H(OH)  | c12cccc1C(=O)C(OO)OC(=O)C2(O)      | 0.132E-09                  | 155.6                     |
| PhOKOESt | 208.                         | 10  | 8   | 5   | 0   | c12cHcHcHcHc1COCH(OH)-O-COC2H(OH)   | c12cccc1C(=O)C(O)OC(=O)C2(O)       | 0.274E-08                  | 141.3                     |
| PhON     | 183.                         | 8   | 9   | 4   | 1   | c1HcHcHcHcHc1CH(OH)CH2(ONO2)        | c1cccc1C(O)C(ON(=O)=O)             | 0.405E-03                  | 88.3                      |
| PhOO     | 138.                         | 8   | 10  | 2   | 0   | c1HcHcHcHcHc1CH(OH)CH2(OH)          | c1cccc1C(O)C(O)                    | 0.489E-03                  | 87.4                      |
| PhOOAnhy | 194.                         | 9   | 6   | 5   | 0   | c12cHcHcHcHc1C(OH)(OH)CO-O-C2O      | c12cccc1C(O)(O)C(=O)OC2=O          | 0.326E-06                  | 117.5                     |
| PhOP     | 213.                         | 8   | 7   | 6   | 1   | c1HcHcHcHcHc1CH(OH)CO(OONO2)        | c1cccc1C(O)C(=O)(OON(=O)=O)        | 0.438E-03                  | 87.3                      |
| PhOUA    | 164.                         | 9   | 8   | 3   | 0   | c1HcHcHcHcHc1Cd(OH)=CdHCO(OH)       | c1cccc1C(O)=CC(=O)(O)              | 0.186E-05                  | 113.2                     |



| Name     | MW<br>(g mol <sup>-1</sup> ) | nbC | nbH | nbO | nbN | Chem code (GECKO-A)                   | Smile code                               | P <sup>sat</sup><br>(torr) | ΔH <sup>vap</sup><br>(kJ) |
|----------|------------------------------|-----|-----|-----|-----|---------------------------------------|------------------------------------------|----------------------------|---------------------------|
| PhOUAnhy | 190.                         | 10  | 6   | 4   | 0   | c12cHcHcHcHc1Cd(OH)=CdHCO-O-C2O       | c12cccc1C(O)=CC(=O)OC2=O                 | 0.152E-07                  | 131.5                     |
| PhOUG    | 180.                         | 9   | 8   | 4   | 0   | c1HcHcHcHcHc1Cd(OH)=CdHCO(OOH)        | c1cccc1C(O)=CC(=O)(OO)                   | 0.993E-05                  | 105.5                     |
| PhOUHEst | 208.                         | 10  | 8   | 5   | 0   | c12cHcHcHcHc1Cd(OH)=CdHCH(OOH)-O-C2O  | c12cccc1C(O)=CC(OO)OC2=O                 | 0.447E-08                  | 138.9                     |
| PhOUOEst | 192.                         | 10  | 8   | 4   | 0   | c12cHcHcHcHc1Cd(OH)=CdHCH(OH)-O-C2O   | c12cccc1C(O)=CC(O)OC2=O                  | 0.856E-07                  | 125.3                     |
| PhOUP    | 225.                         | 9   | 7   | 6   | 1   | c1HcHcHcHcHc1Cd(OH)=CdHCO(OONO2)      | c1cccc1C(O)=CC(=O)(OON(=O)=O)            | 0.604E-04                  | 96.0                      |
| PhPA     | 227.                         | 8   | 5   | 7   | 1   | CO(OH)c1cHcHcHcHc1CO(OONO2)           | C(=O)(O)c1cccc1C(=O)(OON(=O)=O)          | 0.572E-05                  | 106.5                     |
| PhPD     | 211.                         | 8   | 5   | 6   | 1   | CHOc1cHcHcHcHc1CO(OONO2)              | C(=O)c1cccc1C(=O)(OON(=O)=O)             | 0.190E-02                  | 78.1                      |
| PhPKOA   | 285.                         | 10  | 7   | 9   | 1   | CO(OH)c1cHcHcHcHc1COCH(OH)CO(OONO2)   | C(=O)(O)c1cccc1C(=O)C(O)C(=O)(OON(=O)=O) | 0.212E-09                  | 154.8                     |
| PhPKOD   | 269.                         | 10  | 7   | 8   | 1   | CO(OONO2)c1cHcHcHcHc1COCH(OH)CHO      | C(=O)(OON(=O)=O)c1cccc1C(=O)C(O)C=O      | 0.253E-06                  | 120.2                     |
| PhPND    | 286.                         | 9   | 6   | 9   | 2   | CO(OONO2)c1cHcHcHcHc1CH(OONO2)CHO     | C(=O)(OON(=O)=O)c1cccc1C(ON(=O)=O)C=O    | 0.337E-05                  | 107.8                     |
| PhPOCD   | 255.                         | 10  | 9   | 7   | 1   | CO(OONO2)c1cHcHcHcHc1CH(OH)CH2CHO     | C(=O)(OON(=O)=O)c1cccc1C(O)CC=O          | 0.210E-05                  | 110.8                     |
| PhPOKA   | 285.                         | 10  | 7   | 9   | 1   | CO(OH)CH(OH)c1cHcHcHcHc1COCO(OONO2)   | C(=O)(O)C(O)c1cccc1C(=O)C(=O)(OON(=O)=O) | 0.212E-09                  | 154.8                     |
| PhPOKD   | 269.                         | 10  | 7   | 8   | 1   | CHOCOc1cHcHcHcHc1CH(OH)CO(OONO2)      | O=CC(=O)c1cccc1C(O)C(=O)(OON(=O)=O)      | 0.253E-06                  | 120.2                     |
| PhPOUA   | 269.                         | 10  | 7   | 8   | 1   | CO(OH)c1cHcHcHcHc1Cd(OH)=CdHCO(OONO2) | C(=O)(O)c1cccc1C(O)=CC(=O)(OON(=O)=O)    | 0.758E-09                  | 149.2                     |
| PhPOUD   | 253.                         | 10  | 7   | 7   | 1   | CO(OONO2)c1cHcHcHcHc1Cd(OH)=CdHCHO    | C(=O)(OON(=O)=O)c1cccc1C(O)=CC=O         | 0.806E-06                  | 115.2                     |
| PhPUA1   | 253.                         | 10  | 7   | 7   | 1   | CO(OH)c1cHcHcHcHc1CdH=CdHCO(OONO2)    | C(=O)(O)c1cccc1C=CC(=O)(OON(=O)=O)       | 0.115E-06                  | 124.1                     |
| PhPUA2   | 253.                         | 10  | 7   | 7   | 1   | CO(OONO2)c1cHcHcHcHc1CdH=CdHCO(OH)    | C(=O)(OON(=O)=O)c1cccc1C=CC(=O)(O)       | 0.115E-06                  | 124.1                     |
| PhPUD1   | 237.                         | 10  | 7   | 6   | 1   | CO(OONO2)c1cHcHcHcHc1CdH=CdHCHO       | C(=O)(OON(=O)=O)c1cccc1C=CC=O            | 0.541E-04                  | 94.1                      |
| PhPUD2   | 237.                         | 10  | 7   | 6   | 1   | CHOc1cHcHcHcHc1CdH=CdHCO(OONO2)       | C(=O)c1cccc1C=CC(=O)(OON(=O)=O)          | 0.645E-04                  | 93.0                      |
| PhUA     | 148.                         | 9   | 8   | 2   | 0   | c1HcHcHcHcHc1CdH=CdHCO(OH)            | c1cccc1C=CC(=O)(O)                       | 0.176E-03                  | 90.7                      |
| PhUAnhy  | 174.                         | 10  | 6   | 3   | 0   | c12cHcHcHcHc1CdH=CdHCO-O-C2O          | c12cccc1C=CC(=O)OC2=O                    | 0.195E-05                  | 107.0                     |
| PhUG     | 164.                         | 9   | 8   | 3   | 0   | c1HcHcHcHcHc1CdH=CdHCO(OOH)           | c1cccc1C=CC(=O)(OO)                      | 0.718E-03                  | 84.3                      |
| PhUHEst1 | 192.                         | 10  | 8   | 4   | 0   | c12cHcHcHcHc1CdH=CdHCH(OOH)-O-C2O     | c12cccc1C=CC(OO)OC2=O                    | 0.945E-06                  | 111.7                     |
| PhUHEst2 | 192.                         | 10  | 8   | 4   | 0   | c12cHcHcHcHc1CdH=CdHCO-O-C2H(OOH)     | c12cccc1C=CC(=O)OC2(OO)                  | 0.694E-06                  | 113.0                     |
| PhUOEst1 | 176.                         | 10  | 8   | 3   | 0   | c12cHcHcHcHc1CdH=CdHCH(OH)-O-C2O      | c12cccc1C=CC(O)OC2=O                     | 0.132E-04                  | 99.6                      |
| PhUOEst2 | 176.                         | 10  | 8   | 3   | 0   | c12cHcHcHcHc1CdH=CdHCO-O-C2H(OH)      | c12cccc1C=CC(=O)OC2(O)                   | 0.974E-05                  | 100.8                     |
| PhUP     | 209.                         | 9   | 7   | 5   | 1   | c1HcHcHcHcHc1CdH=CdHCO(OONO2)         | c1cccc1C=CC(=O)(OON(=O)=O)               | 0.257E-02                  | 77.0                      |
| VOOPhUA  | 225.                         | 9   | 7   | 6   | 1   | c1(OH)c(NO2)cHcHc(OH)c1CdH=CdHCO(OH)  | c1(O)c(N(=O)=O)ccc(O)c1C=CC(=O)(O)       | 0.135E-10                  | 167.2                     |
| VOPh     | 139.                         | 6   | 5   | 3   | 1   | c1HcHcHcHc(NO2)c1(OH)                 | c1cccc(N(=O)=O)c1(O)                     | 0.805E-02                  | 72.1                      |

| Name    | MW<br>(g mol <sup>-1</sup> ) | nbC | nbH | nbO | nbN | Chem code (GECKO-A)                  | Smile code                             | P <sup>sat</sup><br>(torr) | ΔH <sup>vap</sup><br>(kJ) |
|---------|------------------------------|-----|-----|-----|-----|--------------------------------------|----------------------------------------|----------------------------|---------------------------|
| VOPhA   | 183.                         | 7   | 5   | 5   | 1   | CO(OH)c1cHcHcHc(OH)c1(NO2)           | C(=O)(O)c1cccc(O)c1(N(=O)=O)           | 0.201E-06                  | 121.5                     |
| VOPhD   | 167.                         | 7   | 5   | 4   | 1   | CHOc1cHcHcHc(OH)c1(NO2)              | C(=O)c1cccc(O)c1(N(=O)=O)              | 0.187E-03                  | 88.4                      |
| VOPhKA  | 211.                         | 8   | 5   | 6   | 1   | c1(OH)c(NO2)cHcHcHc1COCO(OH)         | c1(O)c(N(=O)=O)cccc1C(=O)C(=O)(O)      | 0.712E-08                  | 136.7                     |
| VOPhKKA | 239.                         | 9   | 5   | 7   | 1   | c1(OH)c(NO2)cHcHcHc1COCOCO(OH)       | c1(O)c(N(=O)=O)cccc1C(=O)C(=O)C(=O)(O) | 0.979E-10                  | 157.1                     |
| VOPhKOA | 241.                         | 9   | 7   | 7   | 1   | c1(OH)c(NO2)cHcHcHc1COCH(OH)CO(OH)   | c1(O)c(N(=O)=O)cccc1C(=O)C(O)C(=O)(O)  | 0.409E-11                  | 173.6                     |
| VOPhOA  | 213.                         | 8   | 7   | 6   | 1   | c1(OH)c(NO2)cHcHcHc1CH(OH)CO(OH)     | c1(O)c(N(=O)=O)cccc1C(O)C(=O)(O)       | 0.198E-09                  | 155.3                     |
| VOPhOUA | 225.                         | 9   | 7   | 6   | 1   | c1(OH)c(NO2)cHcHcHc1Cd(OH)=CdHCO(OH) | c1(O)c(N(=O)=O)cccc1C(O)=CC(=O)(O)     | 0.167E-10                  | 167.1                     |
| VOPhUA  | 209.                         | 9   | 7   | 5   | 1   | c1(OH)c(NO2)cHcHcHc1CdH=CdHCO(OH)    | c1(O)c(N(=O)=O)cccc1C=CC(=O)(O)        | 0.313E-08                  | 140.8                     |

**Table S2: radical species list**

| Name      | MW<br>(g mol <sup>-1</sup> ) | Chem code (GECKO-A)                          | Name      | MW<br>(g mol <sup>-1</sup> ) | Chem code (GECKO-A)                     |
|-----------|------------------------------|----------------------------------------------|-----------|------------------------------|-----------------------------------------|
| 1DC       | 59.                          | CHOCH2(O.)                                   | 1PhDKOA   | 223.                         | CO(OH)c1cHcHcHcHc1COCH(OH)CO(O.)        |
| 1Na       | 143.                         | c12cHcHcHcHc1cHcHcHc2(O.)                    | 1PhDKOD   | 207.                         | CO(O.)c1cHcHcHcHc1COCH(OH)CHO           |
| 1NaEpox   | 177.                         | c12cHcHcHcHc1C3H-O-C3HCH(OH)C2H(O.)          | 1PhDOCD   | 193.                         | CO(O.)c1cHcHcHcHc1CH(OH)CH2CHO          |
| 1NaKON    | 238.                         | c12cHcHcHcHc1CH(ONO2)CH(O.)CH(OH)C2O         | 1PhDOD    | 193.                         | CHOc1cHcHcHcHc1CH(O.)CH(OH)CHO          |
| 1NaO      | 159.                         | c12cHcHcHcHc1cHcHc(O.)c2(OH)                 | 1PhDOKA   | 223.                         | CO(OH)CH(OH)c1cHcHcHcHc1COCO(O.)        |
| 1NaOBp    | 193.                         | c12cHcHcHcHc1CH(O.)C3HCH(OH)C2H-O--O3-       | 1PhDOKD   | 207.                         | CHOCoc1cHcHcHcHc1CH(OH)CO(O.)           |
| 1NaOEpox  | 193.                         | c12cHcHcHcHc1C3H-O-C3HCH(OH)C2(OH)(O.)       | 1PhDOOD   | 209.                         | CHOc1cHcHcHcHc1C(OH)(O.)CH(OH)CHO       |
| 1NaOKK    | 191.                         | c12cHcHcHcHc1CH(OH)CH(O.)COC2O               | 1PhDOOD1  | 209.                         | CHOc1cHcHcHcHc1C(OH)(OH)CH(O.)CHO       |
| 1NaOOBp   | 209.                         | c12cHcHcHcHc1CH(O.)C3HCH(OH)C2(OH)-O--O3-    | 1PhDOUA   | 207.                         | CO(OH)c1cHcHcHcHc1Cd(OH)=CdHCO(O.)      |
| 1NaOOK    | 193.                         | c12cHcHcHcHc1COCH(OH)CH(O.)C2H(OH)           | 1PhDOUD   | 191.                         | CO(O.)c1cHcHcHcHc1Cd(OH)=CdHCHO         |
| 1NaOOK2   | 193.                         | c12cHcHcHcHc1CH(OH)CH(O.)CH(OH)C2O           | 1PhDUA1   | 191.                         | CO(OH)c1cHcHcHcHc1CdH=CdHCO(O.)         |
| 1NaOOBp   | 225.                         | c12cHcHcHcHc1C(OH)(O.)C3HCH(OH)C2(OH)-O--O3- | 1PhDUA2   | 191.                         | CO(O.)c1cHcHcHcHc1CdH=CdHCO(OH)         |
| 1NaOOort  | 177.                         | c12cHcHcHcHc1CH(OH)CH(O.)CdH=Cd2(OH)         | 1PhDUD1   | 175.                         | CO(O.)c1cHcHcHcHc1CdH=CdHCHO            |
| 1NaOort   | 161.                         | c12cHcHcHcHc1CdH=CdHCH(O.)C2H(OH)            | 1PhDUD2   | 175.                         | CHOc1cHcHcHcHc1CdH=CdHCO(O.)            |
| 1NaOpar   | 161.                         | c12cHcHcHcHc1CH(O.)CdH=CdHC2H(OH)            | 1PhEst    | 149.                         | c12cHcHcHcHc1CO-O-C2H(O.)               |
| 1ONaEpox  | 193.                         | c12cHcHcHc(OH)c1C3H-O-C3HCH(OH)C2H(O.)       | 1PhKA     | 165.                         | c1(O.)cHcHcHcHc1COCO(OH)                |
| 1ONaOBp   | 209.                         | c12cHcHcHc(OH)c1CH(O.)C3HCH(OH)C2H-O--O3-    | 1PhKD     | 149.                         | c1HcHcHcHcHc1COCO(O.)                   |
| 1ONaOOK   | 209.                         | c12cHcHcHc(OH)c1COCH(OH)CH(O.)C2H(OH)        | 1PhKKA    | 193.                         | c1(O.)cHcHcHcHc1COCOCO(OH)              |
| 1ONaOort  | 177.                         | c12cHcHcHc(OH)c1CdH=CdHCH(O.)C2H(OH)         | 1PhKOA    | 195.                         | c1(O.)cHcHcHcHc1COCH(OH)CO(OH)          |
| 1ONaOpar  | 177.                         | c12cHcHcHc(OH)c1CH(O.)CdH=CdHC2H(OH)         | 1PhKOD    | 179.                         | c1HcHcHcHcHc1COCH(OH)CO(O.)             |
| 1OPhDEnol | 193.                         | CHOc1cHcHcHc(OH)c1CH(O.)CdH=CdH(OH)          | 1PhKOEest | 207.                         | c12cHcHcHcHc1COCH(OH)CH(O.)-O-C2O       |
| 1OPhDOD   | 209.                         | CHOc1cHcHcHc(OH)c1CH(O.)CH(OH)CHO            | 1PhO      | 137.                         | c1HcHcHcHcHc1CH(OH)CH2(O.)              |
| 1OPhDUA   | 207.                         | CO(OH)c1cHcHcHc(OH)c1CdH=CdHCO(O.)           | 1PhOA     | 167.                         | c1(O.)cHcHcHcHc1CH(OH)CO(OH)            |
| 1OPhDUD   | 191.                         | CO(O.)c1cHcHcHc(OH)c1CdH=CdHCHO              | 1PhOCD    | 165.                         | c1HcHcHcHcHc1CH(OH)CH2CO(O.)            |
| 1OPhUA    | 179.                         | c1(O.)cHcHcHc(OH)c1CdH=CdHCO(OH)             | 1PhOCEst  | 193.                         | c12cHcHcHcHc1CH(OH)CH2CH(O.)-O-C2O      |
| 1OPhUD    | 163.                         | c1HcHcHcHc(OH)c1CdH=CdHCO(O.)                | 1PhOD     | 151.                         | c1HcHcHcHcHc1CH(OH)CO(O.)               |
| 1OPhUEst  | 191.                         | c12cHcHcHc(OH)c1CdH=CdHCH(O.)-O-C2O          | 1PhOKEst  | 207.                         | c12cHcHcHcHc1COCH(O.)-O-COC2H(OH)       |
| 1Ph       | 93.                          | c1HcHcHcHcHc1(O.)                            | 1PhOUA    | 179.                         | c1(O.)cHcHcHcHc1Cd(OH)=CdHCO(OH)        |
| 1PhA      | 137.                         | CO(OH)c1cHcHcHcHc1(O.)                       | 1PhOUD    | 163.                         | c1HcHcHcHcHc1Cd(OH)=CdHCO(O.)           |
| 1PhAEnol  | 193.                         | CO(OH)c1cHcHcHcHc1CH(O.)CdH=CdH(OH)          | 1PhOUEst  | 191.                         | c12cHcHcHcHc1Cd(OH)=CdHCH(O.)-O-C2O     |
| 1PhAO     | 181.                         | CO(OH)c1cHcHcHcHc1CH(OH)CH2(O.)              | 1PhUA     | 163.                         | c1(O.)cHcHcHcHc1CdH=CdHCO(OH)           |
| 1PhAOCD   | 209.                         | CO(OH)c1cHcHcHcHc1CH(OH)CH2CO(O.)            | 1PhUD     | 147.                         | c1HcHcHcHcHc1CdH=CdHCO(O.)              |
| 1PhAOOD   | 225.                         | CO(OH)c1cHcHcHcHc1C(OH)(O.)CH(OH)CHO         | 1PhUEst1  | 175.                         | c12cHcHcHcHc1CdH=CdHCH(O.)-O-C2O        |
| 1PhD      | 121.                         | CHOc1cHcHcHcHc1(O.)                          | 1PhUEst2  | 175.                         | c12cHcHcHcHc1CdH=CdHCO-O-C2H(O.)        |
| 1PhDA     | 165.                         | CO(OH)c1cHcHcHcHc1CO(O.)                     | 2DC       | 75.                          | CHOCH2(OO.)                             |
| 1PhDD     | 149.                         | CHOc1cHcHcHcHc1CO(O.)                        | 2Na       | 159.                         | c12cHcHcHcHc1cHcHcHc2(OO.)              |
| 1PhDEnol  | 177.                         | CHOc1cHcHcHcHc1CH(O.)CdH=CdH(OH)             | 2NaKON    | 254.                         | c12cHcHcHcHc1CH(ONO2)CH(OO.)CH(OH)C2O   |
| 1PhDKD    | 191.                         | CHOc1cHcHcHcHc1COCH(O.)CHO                   | 2NaO      | 175.                         | c12cHcHcHcHc1cHcHc(OO.)c2(OH)           |
|           |                              |                                              | 2NaOBp    | 209.                         | c12cHcHcHcHc1CH(OO.)C3HCH(OH)C2H-O--O3- |

| Name     | MW<br>(g mol <sup>-1</sup> ) | Chem code (GECKO-A)                                           |
|----------|------------------------------|---------------------------------------------------------------|
| 2NaOKK   | 207.                         | c12cHcHcHc1CH(OH)CH(OO.)COC2O                                 |
| 2NaOO    | 193.                         | c12cHcHcHc1CH(OH)CH(OO.)CdH=Cd2(OH) <i>-interm_par/ort-</i>   |
| 2NaOOBp  | 225.                         | c12cHcHcHc1CH(OO.)C3HCH(OH)C2(OH)-O--O3-                      |
| 2NaOOK   | 209.                         | c12cHcHcHc1COCH(OH)CH(OO.)C2H(OH)                             |
| 2NaOOK2  | 209.                         | c12cHcHcHc1CH(OH)CH(OO.)CH(OH)C2O                             |
| 2NaOOO   | 209.                         | c12cHcHcHc1Cd(OH)=CdHCH(OH)C2(OH)(OO.)                        |
| 2NaOOOBp | 241.                         | c12cHcHcHc1C(OH)(OO.)C3HCH(OH)C2(OH)-O--O3-                   |
| 2NaOOort | 193.                         | c12cHcHcHc1CH(OH)CH(OO.)CdH=Cd2(OH)                           |
| 2NaOort  | 177.                         | c12cHcHcHc1CdH=CdHCH(OO.)C2H(OH)                              |
| 2NaOpar  | 177.                         | c12cHcHcHc1CH(OO.)CdH=CdHC2H(OH)                              |
| 2ONaO    | 193.                         | c12cHcHcHc(OH)c1CdH=CdHCH(OO.)C2H(OH) <i>-interm_par/ort-</i> |
| 2ONaOBp  | 225.                         | c12cHcHcHc(OH)c1CH(OO.)C3HCH(OH)C2H-O--O3-                    |
| 2ONaOOK  | 225.                         | c12cHcHcHc(OH)c1COCH(OH)CH(OO.)C2H(OH)                        |
| 2ONaOort | 193.                         | c12cHcHcHc(OH)c1CdH=CdHCH(OO.)C2H(OH)                         |
| 2ONaOpar | 193.                         | c12cHcHcHc(OH)c1CH(OO.)CdH=CdHC2H(OH)                         |
| 2OPhDOD  | 225.                         | CHOc1cHcHcHc(OH)c1CH(OO.)CH(OH)CHO                            |
| 2OPhUA   | 195.                         | c1(OO.)cHcHcHc(OH)c1CdH=CdHCO(OH)                             |
| 2OPhUEst | 207.                         | c12cHcHcHc(OH)c1CdH=CdHCH(OO.)-O-C2O                          |
| 2Ph      | 109.                         | c1HcHcHcHc1(OO.)                                              |
| 2PhA     | 153.                         | CO(OH)c1cHcHcHc1(OO.)                                         |
| 2PhAO    | 197.                         | CO(OH)c1cHcHcHc1CH(OH)CH2(OO.)                                |
| 2PhD     | 137.                         | CHOc1cHcHcHc1(OO.)                                            |
| 2PhDKD   | 207.                         | CHOc1cHcHcHc1COCH(OO.)CHO                                     |
| 2PhDOD   | 209.                         | CHOc1cHcHcHc1CH(OO.)CH(OH)CHO                                 |
| 2PhDOOD  | 225.                         | CHOc1cHcHcHc1C(OH)(OH)CH(OO.)CHO                              |
| 2PhEst   | 165.                         | c12cHcHcHc1CO-O-C2H(OO.)                                      |
| 2PhKA    | 181.                         | c1(OO.)cHcHcHc1COCOC(OH)                                      |
| 2PhKKA   | 209.                         | c1(OO.)cHcHcHc1COCOC(OH)                                      |
| 2PhKOA   | 211.                         | c1(OO.)cHcHcHc1COCH(OH)CO(OH)                                 |
| 2PhKOESt | 223.                         | c12cHcHcHc1COCH(OH)CH(OO.)-O-C2O                              |
| 2PhO     | 153.                         | c1HcHcHcHc1CH(OH)CH2(OO.)                                     |
| 2PhOA    | 183.                         | c1(OO.)cHcHcHc1CH(OH)CO(OH)                                   |
| 2PhOCEst | 209.                         | c12cHcHcHc1CH(OH)CH2CH(OO.)-O-C2O                             |
| 2PhOKESt | 223.                         | c12cHcHcHc1COCH(OO.)-O-COC2H(OH)                              |
| 2PhOUA   | 195.                         | c1(OO.)cHcHcHc1Cd(OH)=CdHCO(OH)                               |
| 2PhOUEst | 207.                         | c12cHcHcHc1Cd(OH)=CdHCH(OO.)-O-C2O                            |
| 2PhUA    | 179.                         | c1(OO.)cHcHcHc1CdH=CdHCO(OH)                                  |
| 2PhUEst1 | 191.                         | c12cHcHcHc1CdH=CdHCH(OO.)-O-C2O                               |
| 2PhUEst2 | 191.                         | c12cHcHcHc1CdH=CdHCO-O-C2H(OO.)                               |
| 3GLY     | 89.                          | CHOCO(OO.)                                                    |

| Name      | MW<br>(g mol <sup>-1</sup> ) | Chem code (GECKO-A)                    |
|-----------|------------------------------|----------------------------------------|
| 3OPhU     | 179.                         | c1HcHcHcHc(OH)c1CdH=CdHCO(OO.)         |
| 3OPhUA    | 223.                         | CO(OH)c1cHcHcHc(OH)c1CdH=CdHCO(OO.)    |
| 3OPhUD    | 207.                         | CO(OO.)c1cHcHcHc(OH)c1CdH=CdHCHO       |
| 3PhA      | 181.                         | CO(OH)c1cHcHcHc1CO(OO.)                |
| 3PhAOC    | 225.                         | CO(OH)c1cHcHcHc1CH(OH)CH2CO(OO.)       |
| 3PhD      | 165.                         | CHOc1cHcHcHc1CO(OO.)                   |
| 3PhK      | 165.                         | c1HcHcHcHc1COCO(OO.)                   |
| 3PhKO     | 195.                         | c1HcHcHcHc1COCH(OH)CO(OO.)             |
| 3PhKOA    | 239.                         | CO(OH)c1cHcHcHc1COCH(OH)CO(OO.)        |
| 3PhKOD    | 223.                         | CO(OO.)c1cHcHcHc1COCH(OH)CHO           |
| 3PhN      | 212.                         | c1HcHcHcHc1CH(ONO2)CO(OO.)             |
| 3PhND     | 240.                         | CO(OO.)c1cHcHcHc1CH(ONO2)CHO           |
| 3PhO      | 167.                         | c1HcHcHcHc1CH(OH)CO(OO.)               |
| 3PhOC     | 181.                         | c1HcHcHcHc1CH(OH)CH2CO(OO.)            |
| 3PhOCD    | 209.                         | CO(OO.)c1cHcHcHc1CH(OH)CH2CHO          |
| 3PhOKA    | 239.                         | CO(OH)CH(OH)c1cHcHcHc1COCO(OO.)        |
| 3PhOKD    | 223.                         | CHOCc1cHcHcHc1CH(OH)CO(OO.)            |
| 3PhOU     | 179.                         | c1HcHcHcHc1Cd(OH)=CdHCO(OO.)           |
| 3PhOUA    | 223.                         | CO(OH)c1cHcHcHc1Cd(OH)=CdHCO(OO.)      |
| 3PhOUD    | 207.                         | CO(OO.)c1cHcHcHc1Cd(OH)=CdHCHO         |
| 3PhU      | 163.                         | c1HcHcHcHc1CdH=CdHCO(OO.)              |
| 3PhUA1    | 207.                         | CO(OH)c1cHcHcHc1CdH=CdHCO(OO.)         |
| 3PhUA2    | 207.                         | CO(OO.)c1cHcHcHc1CdH=CdHCO(OH)         |
| 3PhUD1    | 191.                         | CO(OO.)c1cHcHcHc1CdH=CdHCHO            |
| 3PhUD2    | 191.                         | CHOc1cHcHcHc1CdH=CdHCO(OO.)            |
| 4NaO      | 145.                         | c12cHcHcHc1CdH=CdHC.HC2H(OH)           |
| 4NaOBp    | 177.                         | c12cHcHcHc1CH.C3HCH(OH)C2H-O--O3-      |
| 4NaOOBp   | 193.                         | c12cHcHcHc1CH.C3HCH(OH)C2(OH)-O--O3-   |
| 4NaOPEN1  | 159.                         | C.Oc1cHcHcHc1CdH=CdHCHO                |
| 4NaOPEN2  | 159.                         | CHOc1cHcHcHc1CdH=CdHC.O                |
| 4NaOPENO  | 177.                         | C.Oc1cHcHcHc1CH(OH)CH2CHO              |
| 4NaOPENOL | 175.                         | C.Oc1cHcHcHc1Cd(OH)=CdHCHO             |
| 4ONaOBp   | 193.                         | c12cHcHcHc(OH)c1CH.C3HCH(OH)C2H-O--O3- |
| 4ONaOPEN  | 175.                         | C.Oc1cHcHcHc(OH)c1CdH=CdHCHO           |
| 4PhDKOD   | 191.                         | C.Oc1cHcHcHc1COCH(OH)CHO               |
| 4PhODKD   | 191.                         | C.Oc1cHcHcHc1CH(OH)CHO                 |
| 5OPhDCrg  | 180.                         | CHOc1cHcHcHc(OH)c1CH2C.H(OO.)          |
| 5PhDCrg   | 164.                         | CHOc1cHcHcHc1CH2C.H(OO.)               |

**Table S3: Detailed naphthalene chemical scheme**

| reaction ID                                  | reaction                                                                                         | kinetic type | kinetic values      |
|----------------------------------------------|--------------------------------------------------------------------------------------------------|--------------|---------------------|
| <b>BLOCK 1: NAPH AND NaV CHEMISTRY</b>       |                                                                                                  |              |                     |
| B1-001                                       | NAPH + HO → 4NaO                                                                                 | ARR2         | 1.105E-12 -908.0    |
| B1-002                                       | 4NaO + NO2 → NaV                                                                                 | ARR1         | 3.6E-11             |
| B1-003                                       | NaV → 1Na + NO                                                                                   | PHOTO        | 4.536E-04           |
| B1-004                                       | NaV + HO → 0.22 NaVO + 0.22 HO2                                                                  | ARR1         | 4.45E-12            |
| B1-005                                       | 4NaO → 0.255 NaO + 0.255 HO2 + 0.079 4NaOBp + 0.546 2NaOort + 0.120 2NaOpar                      | ARR1(O2)     | 4.47E-16            |
| B1-006                                       | 1Na + O3 → 2Na                                                                                   | ARR1         | 2.86E-13            |
| B1-007                                       | 1Na + NO2 → NaVO                                                                                 | ARR1         | 2.08E-12            |
| B1-008                                       | 1Na + HO2 → NaO                                                                                  | ARR1         | 2.30E-13            |
| B1-009                                       | 2Na + NO → 1Na + NO2                                                                             | ARR2         | 2.7E-12 -360.0      |
| B1-010                                       | 2Na + NO2 → 1Na + NO3                                                                            | ARR3         | 6.143E-09 -1.1 0.00 |
| B1-011                                       | 2Na + NO3 → 1Na + NO2                                                                            | ARR2         | 8.90E-12 390.0      |
| B1-012                                       | 2Na + HO2 → NaH                                                                                  | ARR2         | 2.096E-13 -1300.0   |
| B1-013                                       | 2Na + MO2 → 0.80 1Na + 0.20 NaO + CH2O + 0.80 HO2                                                | ARR2         | 1.03E-13 -324.0     |
| <b>BLOCK 2: 2NaOpar CHEMISTRY (PARA RO2)</b> |                                                                                                  |              |                     |
| B2-001                                       | 2NaOpar + NO → 0.82 1NaOpar + 0.18 NaONpar + 0.82 NO2                                            | ARR2         | 2.7E-12 -360.0      |
| B2-002                                       | 2NaOpar + HO2 → NaOHpar                                                                          | ARR2         | 2.577E-13 -1300.0   |
| B2-003                                       | 2NaOpar + NO3 → 1NaOpar + NO2                                                                    | ARR2         | 8.90E-12 390.0      |
| B2-004                                       | 2NaOpar + MO2 → 0.60 1NaOpar + 0.20 NaOOpar + 0.20 NaOKpar + 0.60 HO2 + 0.80 CH2O + 0.20 MOH     | ARR2         | 1.00E-13 -663.59    |
| B2-005                                       | 1NaOpar → NaOKpar + HO2                                                                          | ARR1(O2)     | 2.50E-14 300.0      |
| B2-006                                       | NaOKpar + HO → 0.225 NaQuin + 0.775 2NaOOK + 0.225 HO2                                           | ARR1         | 8.80E-11            |
| B2-007                                       | 2NaOOK + NO → 0.875 1NaOOK + 0.125 NaNOOK + 0.875 NO2                                            | ARR2         | 2.7E-12 -360.0      |
| B2-008                                       | 2NaOOK + HO2 → NaHOOK                                                                            | ARR2         | 2.659E-13 -1300.0   |
| B2-009                                       | 2NaOOK + NO3 → 1NaOOK + NO2                                                                      | ARR2         | 8.90E-12 390.0      |
| B2-010                                       | 2NaOOK + MO2 → 0.60 1NaOOK + 0.20 NaOOOK + 0.20 NaOOKK + 0.60 HO2 + 0.80 CH2O + 0.20 MOH         | ARR2         | 1.03E-13 -791.0     |
| B2-011                                       | 1NaOOK → 0.57 PhODKD + 0.43 PhDKOD + HO2                                                         | ARR3         | 1.12E+09 1.7 2301.0 |
| B2-012                                       | PhODKD + HO → 0.82 4PhODKD + 0.18 PhDKKD + 0.18 HO2                                              | ARR1         | 3.56E-11            |
| B2-013                                       | PhODKD + NO3 → PhDKKD + HNO3 + HO2                                                               | ARR1         | 2.87E-13            |
| B2-014                                       | 4PhODKD → 0.40 2PhOKEst + 0.60 3PhOKD                                                            | ARR1         | 1.00E+06            |
| B2-015                                       | 2PhOKEst + NO → 1PhOKEst + NO2                                                                   | ARR2         | 2.7E-12 -360.0      |
| B2-016                                       | 2PhOKEst + HO2 → 0.540 PhOKHEst + 0.460 PhOKAnhy + 0.20 HO + 0.20 HO2                            | ARR2         | 2.62E-13 -1300.0    |
| B2-017                                       | 2PhOKEst + NO3 → 1PhOKEst + NO2                                                                  | ARR2         | 8.90E-12 390.0      |
| B2-018                                       | 2PhOKEst + MO2 → 0.60 1PhOKEst + 0.20 PhOKAnhy + 0.20 PhOKOEst + 0.60 HO2 + 0.80 CH2O + 0.20 MOH | ARR2         | 1.03E-13 -955.0     |
| B2-019                                       | 1PhOKEst → 3PhOKA                                                                                | ARR3         | 8.00E+10 1.7 3723.0 |
| B2-020                                       | 3PhOKA + NO → 1PhDOKA + NO2                                                                      | ARR2         | 7.50E-12 -290.0     |
| B2-021                                       | 3PhOKA + NO2 → PhPOKA                                                                            | ARR3         | 6.143E-09 -1.1 0.0  |
| B2-022                                       | 3PhOKA + NO3 → 1PhDOKA + NO2                                                                     | ARR2         | 8.90E-12 305.0      |
| B2-023                                       | 3PhOKA + HO2 → 0.65 PhGOKA + 0.15 PhAOKA + 0.20 1PhDOKA + 0.15 O3 + 0.20 HO                      | ARR2         | 3.324E-12 -730.0    |
| B2-024                                       | 3PhOKA + MO2 → 0.80 1PhDOKA + 0.20 PhAOKA + CH2O + 0.80 HO2                                      | ARR2         | 2.000E-12 -508.0    |
| B2-025                                       | 3PhOKD + NO → 1PhDOKD + NO2                                                                      | ARR2         | 7.50E-12 -290.0     |
| B2-026                                       | 3PhOKD + NO2 → PhPOKD                                                                            | ARR3         | 6.143E-09 -1.1 0.0  |
| B2-027                                       | 3PhOKD + NO3 → 1PhDOKD + NO2                                                                     | ARR2         | 8.90E-12 305.0      |
| B2-028                                       | 3PhOKD + HO2 → 0.65 PhGOKD + 0.15 PhAOKD + 0.20 1PhDOKD + 0.15 O3 + 0.20 HO                      | ARR2         | 3.324E-12 -730.0    |
| B2-029                                       | 3PhOKD + MO2 → 0.80 1PhDOKD + 0.20 PhAOKD + CH2O + 0.80 HO2                                      | ARR2         | 2.000E-12 -508.0    |

|        |                |                                                                                                             |           |                     |
|--------|----------------|-------------------------------------------------------------------------------------------------------------|-----------|---------------------|
| B2-030 | 1PhDOKA        | → 0.60 PhOKAnhy + 0.60 HO +<br>0.20 2PhOA + 0.2 CO + 0.2 CO2 +<br>0.20 PhDKA + 0.2 CO2 + 0.2 HO2            | ARR1      | 1.00E+06            |
| B2-031 | 1PhDOKD        | → 0.60 PhOKAnhy + 0.60 HO2 +<br>0.20 PhKDD + 0.20 CO2 + 0.20 HO2 +<br>0.20 3PhO + 0.20 CO2 + 0.20 CO        | ARR1      | 1.00E+06            |
| B2-032 | 2PhOA + NO     | → 1PhOA + NO2                                                                                               | ARR2      | 2.7E-12 -360.0      |
| B2-033 | 2PhOA + NO2    | → 1PhOA + NO3                                                                                               | ARR3      | 6.143E-09 -1.1 0.0  |
| B2-034 | 2PhOA + NO3    | → 1PhOA + NO2                                                                                               | ARR2      | 8.90E-12 390.0      |
| B2-035 | 2PhOA + HO2    | → HPhOA                                                                                                     | ARR2      | 2.335E-13 -1300.0   |
| B2-036 | 2PhOA + MO2    | → 0.80 1PhOA + 0.20 OPhOA + CH2O +<br>0.80 HO2                                                              | ARR2      | 1.03E-13 -398.0     |
| B2-037 | 1PhOA + O3     | → 2PhOA                                                                                                     | ARR1      | 2.86E-13            |
| B2-038 | 1PhOA + NO2    | → VOPhOA                                                                                                    | ARR1      | 2.08E-12            |
| B2-039 | 1PhOA + HO2    | → OPhOA                                                                                                     | ARR1      | 2.30E-13            |
| B2-040 | 3PhO + NO      | → 1PhOD + NO2                                                                                               | ARR2      | 7.50E-12 -290.0     |
| B2-041 | 3PhO + NO2     | → PhOP                                                                                                      | ARR3      | 6.143E-09 -1.1 0.0  |
| B2-042 | 3PhO + NO3     | → 1PhOD + NO2                                                                                               | ARR2      | 8.90E-12 305.0      |
| B2-043 | 3PhO + HO2     | → 0.65 PhOG + 0.15 PhOA +<br>0.20 1PhOD + 0.15 O3 + 0.20 HO                                                 | ARR2      | 3.324E-12 -730.0    |
| B2-044 | 3PhO + MO2     | → 0.80 1PhOD + 0.20 PhOA +<br>CH2O + 0.80 HO2                                                               | ARR2      | 2.000E-12 -508.0    |
| B2-045 | 1PhOD          | → PhD + CO2 + HO2                                                                                           | ARR1      | 1.00E+06            |
| B2-046 | PhOKAnhy       | → PhAOKA                                                                                                    | ARR1(H2O) | 2.50E-22            |
| B2-047 | PhKDKD + HO    | → 0.6 PhKKAAnhy + 0.24 HO + 0.36 HO2 +<br>0.2 2PhKA + 0.20 CO + 0.20 CO2 +<br>0.2 3PhK + 0.20 CO + 0.20 CO2 | ARR1      | 2.59E-11            |
| B2-048 | 2PhKA + NO     | → 1PhKA + NO2                                                                                               | ARR2      | 2.7E-12 -360.0      |
| B2-049 | 2PhKA + NO2    | → 1PhKA + NO3                                                                                               | ARR3      | 6.143E-09 -1.1 0.0  |
| B2-050 | 2PhKA + NO3    | → 1PhKA + NO2                                                                                               | ARR2      | 8.90E-12 390.0      |
| B2-051 | 2PhKA + HO2    | → HPhKA                                                                                                     | ARR2      | 2.335E-13 -1300.0   |
| B2-052 | 2PhKA + MO2    | → 0.80 1PhKA + 0.20 OPhKA +<br>CH2O + 0.80 HO2                                                              | ARR2      | 1.03E-13 -398.0     |
| B2-053 | 1PhKA + O3     | → 2PhKA                                                                                                     | ARR1      | 2.86E-13            |
| B2-054 | 1PhKA + NO2    | → VOPhKA                                                                                                    | ARR1      | 2.08E-12            |
| B2-055 | 1PhKA + HO2    | → OPhKA                                                                                                     | ARR1      | 2.30E-13            |
| B2-056 | 3PhK + NO      | → 1PhKD + NO2                                                                                               | ARR2      | 7.50E-12 -290.0     |
| B2-057 | 3PhK + NO2     | → PhKP                                                                                                      | ARR3      | 6.143E-09 -1.1 0.0  |
| B2-058 | 3PhK + NO3     | → 1PhKD + NO2                                                                                               | ARR2      | 8.90E-12 305.0      |
| B2-059 | 3PhK + HO2     | → 0.65 PhKG + 0.15 PhKA + 0.20 1PhKD +<br>0.15 O3 + 0.20 HO                                                 | ARR2      | 3.324E-12 -730.0    |
| B2-060 | 3PhK + MO2     | → 0.80 1PhKD + 0.20 PhKA + CH2O +<br>0.80 HO2                                                               | ARR2      | 2.000E-12 -508.0    |
| B2-061 | 1PhKD          | → 2Ph + CO2 + CO                                                                                            | ARR1      | 1.00E+06            |
| B2-062 | 2Ph + NO       | → 1Ph + NO2                                                                                                 | ARR2      | 2.7E-12 -360.0      |
| B2-063 | 2Ph + NO2      | → 1Ph + NO3                                                                                                 | ARR3      | 6.143E-09 -1.1 0.0  |
| B2-064 | 2Ph + NO3      | → 1Ph + NO2                                                                                                 | ARR2      | 8.90E-12 390.0      |
| B2-065 | 2Ph + HO2      | → HPh                                                                                                       | ARR2      | 2.335E-13 -1300.0   |
| B2-066 | 2Ph + MO2      | → 0.80 1Ph + 0.20 OPh + CH2O +<br>0.80 HO2                                                                  | ARR2      | 1.03E-13 -398.0     |
| B2-067 | 1Ph + O3       | → 2Ph                                                                                                       | ARR1      | 2.86E-13            |
| B2-068 | 1Ph + NO2      | → VOPh                                                                                                      | ARR1      | 2.08E-12            |
| B2-069 | 1Ph + HO2      | → OPh                                                                                                       | ARR1      | 2.30E-13            |
| B2-070 | PhKKAAnhy      | → PhKAKA                                                                                                    | ARR1(H2O) | 2.50E-22            |
| B2-071 | PhDKOD + HO    | → 0.82 4PhDKOD + 0.18 PhDKKD +<br>0.18 HO2                                                                  | ARR1      | 3.04E-11            |
| B2-072 | PhDKOD + NO3   | → PhDKKD + HNO3 + HO2                                                                                       | ARR1      | 1.92E-13            |
| B2-073 | 4PhDKOD        | → 0.40 2PhKOESt + 0.60 3PhKOD                                                                               | ARR1      | 1.00E+06            |
| B2-074 | 2PhKOESt + NO  | → 1PhKOESt + NO2                                                                                            | ARR2      | 2.7E-12 -360.0      |
| B2-075 | 2PhKOESt + HO2 | → 0.540 PhKOHEst + 0.460 PhKOAAnhy +<br>0.20 HO + 0.20 HO2                                                  | ARR2      | 2.62E-13 -1300.0    |
| B2-076 | 2PhKOESt + NO3 | → 1PhKOESt + NO2                                                                                            | ARR2      | 8.90E-12 390.0      |
| B2-077 | 2PhKOESt + MO2 | → 0.60 1PhKOESt + 0.20 PhKOAAnhy +<br>0.20 PhKOOEst + 0.60 HO2 +<br>0.80 CH2O + 0.20 MOH                    | ARR2      | 1.03E-13 -955.0     |
| B2-078 | 1PhKOESt       | → 3PhKOA                                                                                                    | ARR3      | 8.00E+10 1.7 3723.0 |
| B2-079 | 3PhKOA + NO    | → 1PhDKOA + NO2                                                                                             | ARR2      | 7.50E-12 -290.0     |

|        |              |                                                                                                                                                                             |           |           |         |     |
|--------|--------------|-----------------------------------------------------------------------------------------------------------------------------------------------------------------------------|-----------|-----------|---------|-----|
| B2-080 | 3PhKOA + NO2 | → PhPKOA                                                                                                                                                                    | ARR3      | 6.143E-09 | -1.1    | 0.0 |
| B2-081 | 3PhKOA + NO3 | → 1PhDKOA + NO2                                                                                                                                                             | ARR2      | 8.90E-12  | 305.0   |     |
| B2-082 | 3PhKOA + HO2 | → 0.65 PhGKOA + 0.15 PhAKOA +<br>0.20 1PhDKOA + 0.15 O3 + 0.20 HO                                                                                                           | ARR2      | 3.324E-12 | -730.0  |     |
| B2-083 | 3PhKOA + MO2 | → 0.80 1PhDKOA + 0.20 PhAKOA +<br>CH2O + 0.80 HO2                                                                                                                           | ARR2      | 2.000E-12 | -508.0  |     |
| B2-084 | 3PhKOD + NO  | → 1PhDKOD + NO2                                                                                                                                                             | ARR2      | 7.50E-12  | -290.0  |     |
| B2-085 | 3PhKOD + NO2 | → PhPKOD                                                                                                                                                                    | ARR3      | 6.143E-09 | -1.1    | 0.0 |
| B2-086 | 3PhKOD + NO3 | → 1PhDKOD + NO2                                                                                                                                                             | ARR2      | 8.90E-12  | 305.0   |     |
| B2-087 | 3PhKOD + HO2 | → 0.65 PhGKOD + 0.15 PhAKOD +<br>0.20 1PhDKOD + 0.15 O3 + 0.20 HO                                                                                                           | ARR2      | 3.324E-12 | -730.0  |     |
| B2-088 | 3PhKOD + MO2 | → 0.80 1PhDKOD + 0.20 PhAKOD +<br>CH2O + 0.80 HO2                                                                                                                           | ARR2      | 2.000E-12 | -508.0  |     |
| B2-089 | 1PhDKOA      | → 0.60 PhKOAnhy + 0.60 HO +<br>0.20 PhAKD + 0.2 CO2 + 0.2 HO2 +<br>0.20 2PhKOA + 0.2 CO2                                                                                    | ARR1      | 1.00E+06  |         |     |
| B2-090 | 1PhDKOD      | → 0.60 PhKOAnhy + 0.60 HO2 +<br>0.20 3PhKO + 0.20 CO2 +<br>0.20 PhKDD + 0.20 CO2 + 0.20 HO2                                                                                 | ARR1      | 1.00E+06  |         |     |
| B2-091 | 2PhKOA + NO  | → 1PhKOA + NO2                                                                                                                                                              | ARR2      | 2.7E-12   | -360.0  |     |
| B2-092 | 2PhKOA + NO2 | → 1PhKOA + NO3                                                                                                                                                              | ARR3      | 6.143E-09 | -1.1    | 0.0 |
| B2-093 | 2PhKOA + NO3 | → 1PhKOA + NO2                                                                                                                                                              | ARR2      | 8.90E-12  | 390.0   |     |
| B2-094 | 2PhKOA + HO2 | → HPhKOA                                                                                                                                                                    | ARR2      | 2.335E-13 | -1300.0 |     |
| B2-095 | 2PhKOA + MO2 | → 0.80 1PhKOA + 0.20 OPhKOA + CH2O +<br>0.80 HO2                                                                                                                            | ARR2      | 1.03E-13  | -398.0  |     |
| B2-096 | 1PhKOA + O3  | → 2PhKOA                                                                                                                                                                    | ARR1      | 2.86E-13  |         |     |
| B2-097 | 1PhKOA + NO2 | → VOPhKOA                                                                                                                                                                   | ARR1      | 2.08E-12  |         |     |
| B2-098 | 1PhKOA + HO2 | → OPhKOA                                                                                                                                                                    | ARR1      | 2.30E-13  |         |     |
| B2-099 | 3PhKO + NO   | → 1PhKOD + NO2                                                                                                                                                              | ARR2      | 7.50E-12  | -290.0  |     |
| B2-100 | 3PhKO + NO2  | → PhKOP                                                                                                                                                                     | ARR3      | 6.143E-09 | -1.1    | 0.0 |
| B2-101 | 3PhKO + NO3  | → 1PhKOD + NO2                                                                                                                                                              | ARR2      | 8.90E-12  | 305.0   |     |
| B2-102 | 3PhKO + HO2  | → 0.65 PhKOG + 0.15 PhKOA +<br>0.20 1PhKOD + 0.15 O3 + 0.20 HO                                                                                                              | ARR2      | 3.324E-12 | -730.0  |     |
| B2-103 | 3PhKO + MO2  | → 0.80 1PhKOD + 0.20 PhKOA + CH2O +<br>0.80 HO2                                                                                                                             | ARR2      | 2.000E-12 | -508.0  |     |
| B2-104 | 1PhKOD       | → PhKD + CO2 + HO2                                                                                                                                                          | ARR1      | 1.00E+06  |         |     |
| B2-105 | PhKOAnhy     | → PhAKOA                                                                                                                                                                    | ARR1(H2O) | 2.50E-22  |         |     |
| B2-106 | PhDKKD + HO  | → 0.60 PhKKAnhy + 0.24 HO + 0.36 HO2 +<br>0.12 2Ph + 0.24 CO + 0.24 CO2 +<br>0.12 2PhD + 0.24 CO + 0.12 CO2 +<br>0.08 2PhA + 0.16 CO + 0.08 CO2 +<br>0.08 2PhKKA + 0.08 CO2 | ARR1      | 2.51E-11  |         |     |
| B2-107 | 2PhKKA + NO  | → 1PhKKA + NO2                                                                                                                                                              | ARR2      | 2.7E-12   | -360.0  |     |
| B2-108 | 2PhKKA + NO2 | → 1PhKKA + NO3                                                                                                                                                              | ARR3      | 6.143E-09 | -1.1    | 0.0 |
| B2-109 | 2PhKKA + NO3 | → 1PhKKA + NO2                                                                                                                                                              | ARR2      | 8.90E-12  | 390.0   |     |
| B2-110 | 2PhKKA + HO2 | → HPhKKA                                                                                                                                                                    | ARR2      | 2.335E-13 | -1300.0 |     |
| B2-111 | 2PhKKA + MO2 | → 0.80 1PhKKA + 0.20 OPhKKA + CH2O +<br>0.80 HO2                                                                                                                            | ARR2      | 1.03E-13  | -398.0  |     |
| B2-112 | 1PhKKA + O3  | → 2PhKKA                                                                                                                                                                    | ARR1      | 2.86E-13  |         |     |
| B2-113 | 1PhKKA + NO2 | → VOPhKKA                                                                                                                                                                   | ARR1      | 2.08E-12  |         |     |
| B2-114 | 1PhKKA + HO2 | → OPhKKA                                                                                                                                                                    | ARR1      | 2.30E-13  |         |     |
| B2-115 | PhKDD + HO   | → 0.60 PhKAnhy + 0.24 HO + 0.36 HO2 +<br>0.12 2Ph + 0.12 CO + 0.24 CO2 +<br>0.12 2PhD + 0.12 CO + 0.12 CO2 +<br>0.08 2PhA + 0.08 CO + 0.08 CO2 +<br>0.08 2PhKA + 0.08 CO2   | ARR1      | 2.51E-11  |         |     |

---

**BLOCK 3: 2NaOort (ORTHO R02) AND NaOPEN CHEMISTRY**

|        |               |                                                                                      |      |           |         |        |
|--------|---------------|--------------------------------------------------------------------------------------|------|-----------|---------|--------|
| B3-001 | 2NaOort + NO  | → 0.875 1NaOort + 0.125 NaONort +<br>0.875 NO2                                       | ARR2 | 2.7E-12   | -360.0  |        |
| B3-002 | 2NaOort + HO2 | → NaOHort                                                                            | ARR2 | 2.659E-13 | -1300.0 |        |
| B3-003 | 2NaOort + NO3 | → 1NaOort + NO2                                                                      | ARR2 | 8.90E-12  | 390.0   |        |
| B3-004 | 2NaOort + MO2 | → 0.60 1NaOort + 0.20 NaOOort +<br>0.20 NaOKort + 0.60 HO2 +<br>0.80 CH2O + 0.20 MOH | ARR2 | 1.03E-13  | -791.0  |        |
| B3-005 | 2NaOort       | → NaOPEN + HO                                                                        | ARR2 | 1.90E11   | 9750.0  |        |
| B3-006 | 1NaOort       | → NaOPEN + HO2                                                                       | ARR3 | 1.12E+09  | 1.7     | 2301.0 |

|        |                |                                                                                  |           |                     |
|--------|----------------|----------------------------------------------------------------------------------|-----------|---------------------|
| B3-007 | NaOPEN + HO    | → 0.52 2PhDOD + 0.28 4NaOPEN1 + 0.20 4NaOPEN2                                    | ARR1      | 6.50E-11            |
| B3-008 | NaOPEN         | → 3PhU + CO + HO2                                                                | PHOTO     | 2.2690E-05          |
| B3-009 | NaOPEN         | → PhDD + 2.0 CO + 2.0 HO2                                                        | PHOTO     | 6.4685E-06          |
| B3-010 | NaOPEN         | → 5PhDCrg + CO                                                                   | PHOTO     | 6.2783E-06          |
| B3-011 | NaOPEN         | → 4NaOPEN2 + HO2                                                                 | PHOTO     | 6.2783E-06          |
| B3-012 | 5PhDCrg        | → 0.625 PhDCA + 0.375 PhDCD + 0.375 H2O2                                         | ARR1(H2O) | 1.205E-14           |
| B3-013 | 5PhDCrg + NO   | → PhDCD + NO2                                                                    | ARR1      | 0.600E-13           |
| B3-014 | 5PhDCrg + NO2  | → PhDCD + NO3                                                                    | ARR1      | 0.200E-11           |
| B3-015 | 5PhDCrg + CO   | → PhDCD + CO2                                                                    | ARR1      | 0.219E-19           |
| B3-016 | 5PhDCrg + HNO3 | → PhDCD + HNO4                                                                   | ARR1      | 0.540E-09           |
| B3-017 | 5PhDCrg + O3   | → PhDCD                                                                          | ARR1      | 0.152E-11           |
| B3-018 | 5PhDCrg        | → PhDCD + HO                                                                     | ARR1      | 0.114E+03           |
| B3-019 | 2PhDOD + NO    | → 0.810 1PhDOD + 0.190 PhDNOD + 0.810 NO2                                        | ARR2      | 2.7E-12 -360.0      |
| B3-020 | 2PhDOD + NO3   | → 1PhDOD + NO2                                                                   | ARR2      | 8.90E-12 390.0      |
| B3-021 | 2PhDOD + HO2   | → PhDHOD                                                                         | ARR2      | 2.66E-13 -1300.0    |
| B3-022 | 2PhDOD + MO2   | → 0.60 1PhDOD + 0.20 PhDOOD + 0.20 PhDKOD + 0.60 HO2 + 0.80 CH2O + 0.20 MOH      | ARR2      | 1.03E-13 -1031.0    |
| B3-023 | 2PhDOD + HO    | → 1PhDOD + HO2                                                                   | ARR2      | 3.70E-11 -350.0     |
| B3-024 | 1PhDOD         | → GLYOX + PhDD + HO2                                                             | ARR3      | 1.12E+09 1.7 1644.0 |
| B3-025 | 4NaOPEN1       | → 0.40 2PhUEst1 + 0.60 3PhUD1                                                    | ARR1      | 1.00E+06            |
| B3-026 | 2PhUEst1 + NO  | → 1PhUEst1 + NO2                                                                 | ARR2      | 2.7E-12 -360.0      |
| B3-027 | 2PhUEst1 + HO2 | → 0.540 PhUHEst1 + 0.460 PhUAnhy + 0.20 HO + 0.20 HO2                            | ARR2      | 2.62E-13 -1300.0    |
| B3-028 | 2PhUEst1 + NO3 | → 1PhUEst1 + NO2                                                                 | ARR2      | 8.90E-12 390.0      |
| B3-029 | 2PhUEst1 + MO2 | → 0.60 1PhUEst1 + 0.20 PhUAnhy + 0.20 PhUOEst1 + 0.60 HO2 + 0.80 CH2O + 0.20 MOH | ARR2      | 1.03E-13 -955.0     |
| B3-030 | 1PhUEst1       | → 3PhUA1                                                                         | ARR3      | 8.00E+10 1.7 3723.0 |
| B3-031 | 3PhUA1 + NO    | → 1PhDUA1 + NO2                                                                  | ARR2      | 7.50E-12 -290.0     |
| B3-032 | 3PhUA1 + NO2   | → PhPUA1                                                                         | ARR3      | 6.143E-09 -1.1 0.0  |
| B3-033 | 3PhUA1 + NO3   | → 1PhDUA1 + NO2                                                                  | ARR2      | 8.90E-12 305.0      |
| B3-034 | 3PhUA1 + HO2   | → 0.65 PhGUA1 + 0.15 PhAUA + 0.20 1PhDUA1 + 0.15 O3 + 0.20 HO                    | ARR2      | 3.324E-12 -730.0    |
| B3-035 | 3PhUA1 + MO2   | → 0.80 1PhDUA1 + 0.20 PhAUA + CH2O + 0.80 HO2                                    | ARR2      | 2.000E-12 -508.0    |
| B3-036 | 1PhDUA1        | → 0.60 PhUAnhy + 0.60 HO + 0.40 PhAD + 0.4 CO + 0.4 CO2 + 0.4 HO2                | ARR1      | 1.00E+06            |
| B3-037 | 3PhUD1 + NO    | → 1PhDUD1 + NO2                                                                  | ARR2      | 7.50E-12 -290.0     |
| B3-038 | 3PhUD1 + NO2   | → PhPUD1                                                                         | ARR3      | 6.143E-09 -1.1 0.0  |
| B3-039 | 3PhUD1 + NO3   | → 1PhDUD1 + NO2                                                                  | ARR2      | 8.90E-12 305.0      |
| B3-040 | 3PhUD1 + HO2   | → 0.65 PhGUD1 + 0.15 PhAUD1 + 0.20 1PhDUD1 + 0.15 O3 + 0.20 HO                   | ARR2      | 3.324E-12 -730.0    |
| B3-041 | 3PhUD1 + MO2   | → 0.80 1PhDUD1 + 0.20 PhAUD1 + CH2O + 0.80 HO2                                   | ARR2      | 2.000E-12 -508.0    |
| B3-042 | 1PhDUD1        | → 0.60 PhUAnhy + 0.60 HO2 + 0.40 3PhU + 0.40 CO2                                 | ARR1      | 1.00E+06            |
| B3-043 | 3PhU + NO      | → 1PhUD + NO2                                                                    | ARR2      | 7.50E-12 -290.0     |
| B3-044 | 3PhU + NO2     | → PhUP                                                                           | ARR3      | 6.143E-09 -1.1 0.0  |
| B3-045 | 3PhU + NO3     | → 1PhUD + NO2                                                                    | ARR2      | 8.90E-12 305.0      |
| B3-046 | 3PhU + HO2     | → 0.65 PhUG + 0.15 PhUA + 0.20 1PhUD + 0.15 O3 + 0.20 HO                         | ARR2      | 3.324E-12 -730.0    |
| B3-047 | 3PhU + MO2     | → 0.80 1PhUD + 0.20 PhUA + CH2O + 0.80 HO2                                       | ARR2      | 2.000E-12 -508.0    |
| B3-048 | 1PhUD          | → PhD + CO + CO2 + HO2                                                           | ARR1      | 1.00E+06            |
| B3-049 | PhUAnhy        | → PhAUA                                                                          | ARR1(H2O) | 2.50E-22            |
| B3-050 | 4NaOPEN2       | → 0.40 2PhUEst2 + 0.60 3PhUD2                                                    | ARR1      | 1.00E+06            |
| B3-051 | 2PhUEst2 + NO  | → 1PhUEst2 + NO2                                                                 | ARR2      | 2.7E-12 -360.0      |
| B3-052 | 2PhUEst2 + HO2 | → 0.540 PhUHEst2 + 0.460 PhUAnhy + 0.20 HO + 0.20 HO2                            | ARR2      | 2.62E-13 -1300.0    |
| B3-053 | 2PhUEst2 + NO3 | → 1PhUEst2 + NO2                                                                 | ARR2      | 8.90E-12 390.0      |
| B3-054 | 2PhUEst2 + MO2 | → 0.60 1PhUEst2 + 0.20 PhUAnhy + 0.20 PhUOEst2 + 0.60 HO2 + 0.80 CH2O + 0.20 MOH | ARR2      | 1.03E-13 -1010.0    |
| B3-055 | 1PhUEst2       | → 3PhUA2                                                                         | ARR3      | 8.00E+10 1.7 3723.0 |



|        |              |                                                                   |      |           |          |
|--------|--------------|-------------------------------------------------------------------|------|-----------|----------|
| B3-056 | 3PhUA2 + NO  | → 1PhDUA2 + NO2                                                   | ARR2 | 7.50E-12  | -290.0   |
| B3-057 | 3PhUA2 + NO2 | → PhPUA2                                                          | ARR3 | 6.143E-09 | -1.1 0.0 |
| B3-058 | 3PhUA2 + NO3 | → 1PhDUA2 + NO2                                                   | ARR2 | 8.90E-12  | 305.0    |
| B3-059 | 3PhUA2 + HO2 | → 0.65 PhGUA2 + 0.15 PhAUA +<br>0.20 1PhDUA2 + 0.15 O3 + 0.20 HO  | ARR2 | 3.324E-12 | -730.0   |
| B3-060 | 3PhUA2 + MO2 | → 0.80 1PhDUA2 + 0.20 PhAUA +<br>CH2O + 0.80 HO2                  | ARR2 | 2.000E-12 | -508.0   |
| B3-061 | 1PhDUA2      | → 0.60 PhUAnhy + 0.60 HO +<br>0.40 2PhUA + 0.40 CO2               | ARR1 | 1.00E+06  |          |
| B3-062 | 2PhUA + NO   | → 1PhUA + NO2                                                     | ARR2 | 2.7E-12   | -360.0   |
| B3-063 | 2PhUA + NO2  | → 1PhUA + NO3                                                     | ARR3 | 6.143E-09 | -1.1 0.0 |
| B3-064 | 2PhUA + NO3  | → 1PhUA + NO2                                                     | ARR2 | 8.90E-12  | 390.0    |
| B3-065 | 2PhUA + HO2  | → HPhUA                                                           | ARR2 | 2.335E-13 | -1300.0  |
| B3-066 | 2PhUA + MO2  | → 0.80 1PhUA + 0.20 OPhUA +<br>CH2O + 0.80 HO2                    | ARR2 | 1.03E-13  | -398.0   |
| B3-067 | 1PhUA + O3   | → 2PhUA                                                           | ARR1 | 2.86E-13  |          |
| B3-068 | 1PhUA + NO2  | → VOPhUA                                                          | ARR1 | 2.08E-12  |          |
| B3-069 | 1PhUA + HO2  | → OPhUA                                                           | ARR1 | 2.30E-13  |          |
| B3-070 | 3PhUD2 + NO  | → 1PhDUD2 + NO2                                                   | ARR2 | 7.50E-12  | -290.0   |
| B3-071 | 3PhUD2 + NO2 | → PhPUD2                                                          | ARR3 | 6.143E-09 | -1.1 0.0 |
| B3-072 | 3PhUD2 + NO3 | → 1PhDUD2 + NO2                                                   | ARR2 | 8.90E-12  | 305.0    |
| B3-073 | 3PhUD2 + HO2 | → 0.65 PhGUD2 + 0.15 PhAUD2 +<br>0.20 1PhDUD2 + 0.15 O3 + 0.20 HO | ARR2 | 3.324E-12 | -730.0   |
| B3-074 | 3PhUD2 + MO2 | → 0.80 1PhDUD2 + 0.20 PhAUD2 +<br>CH2O + 0.80 HO2                 | ARR2 | 2.000E-12 | -508.0   |
| B3-075 | 1PhDUD2      | → 0.60 PhUAnhy + HO2 +<br>0.40 PhDD + 0.4 CO + 0.4 CO2            | ARR1 | 1.00E+06  |          |

---

**BLOCK 4: 4NaOBp CHEMISTRY (PEROXY BRIDGE)**

|        |                |                                                                                         |          |           |            |
|--------|----------------|-----------------------------------------------------------------------------------------|----------|-----------|------------|
| B4-001 | 4NaOBp         | → 0.75 2NaOBp + 0.25 1NaEpox                                                            | ARR1     | 1.0E+06   |            |
| B4-002 | 2NaOBp + NO    | → 0.91 1NaOBp + 0.09 NaONBp +<br>0.91 NO2                                               | ARR2     | 2.7E-12   | -360.0     |
| B4-003 | 2NaOBp + HO2   | → NaOHBp                                                                                | ARR2     | 2.447E-13 | -1300.0    |
| B4-004 | 2NaOBp + NO3   | → 1NaOBp + NO2                                                                          | ARR2     | 8.90E-12  | 390.0      |
| B4-005 | 2NaOBp + MO2   | → 0.60 1NaOBp + 0.20 NaOOBp +<br>0.20 NaOKBp + 0.60 HO2 +<br>0.80 CH2O + 0.20 MOH       | ARR2     | 1.03E-13  | -598.0     |
| B4-006 | 1NaOBp         | → 1PhDOD                                                                                | ARR3     | 1.12E+09  | 1.7 2413.0 |
| B4-007 | 1NaEpox        | → 1PhDEnol                                                                              | ARR3     | 1.12E+09  | 1.7 2301.0 |
| B4-008 | 1PhDEnol       | → 4NaOPENO                                                                              | ARR2     | 6.00E+10  | 2990.0     |
| B4-009 | 1PhDEnol       | → PhDD + 2DC                                                                            | ARR3     | 1.12E+09  | 1.7 4830.9 |
| B4-010 | 4NaOPENO       | → 0.40 2PhOCEst + 0.60 3PhOCD                                                           | ARR1     | 1.00E+06  |            |
| B4-011 | 2PhOCEst + NO  | → 1PhOCEst + NO2                                                                        | ARR2     | 2.7E-12   | -360.0     |
| B4-012 | 2PhOCEst + HO2 | → 0.540 PhOCHEst + 0.460 PhOCAnhy +<br>0.20 HO + 0.20 HO2                               | ARR2     | 2.62E-13  | -1300.0    |
| B4-013 | 2PhOCEst + NO3 | → 1PhOCEst + NO2                                                                        | ARR2     | 8.90E-12  | 390.0      |
| B4-014 | 2PhOCEst + MO2 | → 0.60 1PhOCEst + 0.20 PhOCAnhy +<br>0.20 PhOCOEst + 0.60 HO2 +<br>0.80 CH2O + 0.20 MOH | ARR2     | 1.03E-13  | -955.0     |
| B4-015 | 1PhOCEst       | → PhOCAnhy + HO2                                                                        | ARR2(O2) | 2.5E-14   | 300.0      |
| B4-016 | 1PhOCEst       | → 3PhAOC                                                                                | ARR3     | 8.00E+10  | 1.7 3723.0 |
| B4-017 | 3PhAOC + NO    | → 1PhAOCD + NO2                                                                         | ARR2     | 7.50E-12  | -290.0     |
| B4-018 | 3PhAOC + NO2   | → PhAOCP                                                                                | ARR3     | 6.143E-09 | -1.1 0.0   |
| B4-019 | 3PhAOC + NO3   | → 1PhAOCD + NO2                                                                         | ARR2     | 8.90E-12  | 305.0      |
| B4-020 | 3PhAOC + HO2   | → 0.65 PhAOCP + 0.15 PhAOCA +<br>0.20 1PhAOCD + 0.15 O3 + 0.20 HO                       | ARR2     | 3.324E-12 | -730.0     |
| B4-021 | 3PhAOC + MO2   | → 0.80 1PhAOCD + 0.20 PhAOCA +<br>CH2O + 0.80 HO2                                       | ARR2     | 2.000E-12 | -508.0     |
| B4-022 | 1PhAOCD        | → 0.60 PhOCAnhy + 0.60 HO +<br>0.40 2PhAO + 0.4 CO2                                     | ARR1     | 1.00E+06  |            |
| B4-023 | 2PhAO + NO     | → 0.88 1PhAO + 0.88 NO2 + 0.12 PhAON                                                    | ARR2     | 2.7E-12   | -360.0     |
| B4-024 | 2PhAO + NO3    | → 1PhAO + NO2                                                                           | ARR2     | 8.90E-12  | 390.0      |
| B4-025 | 2PhAO + HO2    | → PhAOH                                                                                 | ARR2     | 2.623E-13 | -1300.0    |
| B4-026 | 2PhAO + MO2    | → 0.60 1PhAO + 0.20 PhAOD +<br>0.20 PhAOD + 0.60 HO2 +<br>0.80 CH2O + 0.20 MOH          | ARR2     | 1.03E-13  | -1038.0    |
| B4-027 | 1PhAO          | → PhAOD + HO2                                                                           | ARR2(O2) | 2.50E-14  | 300.0      |
| B4-028 | 1PhAO          | → PhAD + CH2O + HO2                                                                     | ARR3     | 1.12E+09  | 1.7 5233.0 |
| B4-029 | 3PhOCD + NO    | → 1PhDOCD + NO2                                                                         | ARR2     | 7.50E-12  | -290.0     |

|        |              |                                                                             |           |           |         |        |
|--------|--------------|-----------------------------------------------------------------------------|-----------|-----------|---------|--------|
| B4-030 | 3PhOCD + NO2 | → PhPOCD                                                                    | ARR3      | 6.143E-09 | -1.1    | 0.0    |
| B4-031 | 3PhOCD + NO3 | → 1PhDOCD + NO2                                                             | ARR2      | 8.90E-12  | 305.0   |        |
| B4-032 | 3PhOCD + HO2 | → 0.65 PhGOCD + 0.15 PhAOCD +<br>0.20 1PhDOCD + 0.15 O3 + 0.20 HO           | ARR2      | 3.324E-12 | -730.0  |        |
| B4-033 | 3PhOCD + MO2 | → 0.80 1PhDOCD + 0.20 PhAOCD +<br>CH2O + 0.80 HO2                           | ARR2      | 2.000E-12 | -508.0  |        |
| B4-034 | 1PhDOCD      | → 0.60 PhOCAnhy + 0.60 HO2 +<br>0.40 3PhOC + 0.40 CO2                       | ARR1      | 1.00E+06  |         |        |
| B4-035 | 3PhOC + NO   | → 1PhOCD + NO2                                                              | ARR2      | 7.50E-12  | -290.0  |        |
| B4-036 | 3PhOC + NO2  | → PhOCP                                                                     | ARR3      | 6.143E-09 | -1.1    | 0.0    |
| B4-037 | 3PhOC + NO3  | → 1PhOCD + NO2                                                              | ARR2      | 8.90E-12  | 305.0   |        |
| B4-038 | 3PhOC + HO2  | → 0.65 PhOCG + 0.15 PhOCA +<br>0.20 1PhOCD + 0.15 O3 + 0.20 HO              | ARR2      | 3.324E-12 | -730.0  |        |
| B4-039 | 3PhOC + MO2  | → 0.80 1PhOCD + 0.20 PhOCA +<br>CH2O + 0.80 HO2                             | ARR2      | 2.000E-12 | -508.0  |        |
| B4-040 | 1PhOCD       | → 2PhO + CO2                                                                | ARR1      | 1.00E+06  |         |        |
| B4-041 | 2PhO + NO    | → 0.88 1PhO + 0.88 NO2 + 0.12 PhON                                          | ARR2      | 2.7E-12   | -360.0  |        |
| B4-042 | 2PhO + NO3   | → 1PhO + NO2                                                                | ARR2      | 8.90E-12  | 390.0   |        |
| B4-043 | 2PhO + HO2   | → PhOH                                                                      | ARR2      | 2.623E-13 | -1300.0 |        |
| B4-044 | 2PhO + MO2   | → 0.60 1PhO + 0.20 PhOO +<br>0.20 PhOD + 0.60 HO2 +<br>0.80 CH2O + 0.20 MOH | ARR2      | 1.03E-13  | -1038.0 |        |
| B4-045 | 1PhO         | → PhOD + HO2                                                                | ARR2(O2)  | 2.50E-14  | 300.0   |        |
| B4-046 | 1PhO         | → PhD + CH2O + HO2                                                          | ARR3      | 1.12E+09  | 1.7     | 5233.0 |
| B4-047 | PhOCAnhy     | → PhAOCA                                                                    | ARR1(H2O) | 2.50E-22  |         |        |

**BLOCK 5.0: NaO CHEMISTRY**

|          |          |                                                                                                    |      |          |  |  |
|----------|----------|----------------------------------------------------------------------------------------------------|------|----------|--|--|
| B5.0-001 | NaO + HO | → 0.217 NaOO + 0.217 HO2 +<br>0.022 ONaO + 0.022 HO2 +<br>0.044 1Na + 0.065 2ONaO +<br>0.652 2NaOO | ARR1 | 1.35E-10 |  |  |
| B5.0-002 | 2ONaO    | → 0.100 4ONaOBp + 0.162 2ONaOpar +<br>0.738 2ONaOort                                               | ARR1 | 1.0E+06  |  |  |
| B5.0-003 | 2NaOO    | → 0.125 4NaOOBp + 0.375 NaOKort +<br>0.375 HO2 + 0.500 2NaOOort                                    | ARR1 | 1.0E+06  |  |  |

**BLOCK 5.1: 4ONaOBp CHEMISTRY (PREROXY BRIDGE)**

|          |               |                                                                                      |      |           |         |        |
|----------|---------------|--------------------------------------------------------------------------------------|------|-----------|---------|--------|
| B5.1-001 | 4ONaOBp       | → 0.75 2ONaOBp + 0.25 1ONaEpoX                                                       | ARR1 | 1.0E+06   |         |        |
| B5.1-002 | 2ONaOBp + NO  | → 0.91 1ONaOBp + 0.09 ONaONBp +<br>0.91 NO2                                          | ARR2 | 2.7E-12   | -360.0  |        |
| B5.1-003 | 2ONaOBp + HO2 | → ONaOHBp                                                                            | ARR2 | 2.447E-13 | -1300.0 |        |
| B5.1-004 | 2ONaOBp + NO3 | → 1ONaOBp + NO2                                                                      | ARR2 | 8.90E-12  | 390.0   |        |
| B5.1-005 | 2ONaOBp + MO2 | → 0.60 1ONaOBp + 0.20 ONaOOBp +<br>0.20 ONaOKBp + 0.60 HO2 +<br>0.80 CH2O + 0.20 MOH | ARR2 | 1.03E-13  | -598.0  |        |
| B5.1-006 | 1ONaOBp       | → 1OPhDOD                                                                            | ARR3 | 1.12E+09  | 1.7     | 2413.0 |
| B5.1-007 | 1OPhDOD       | → GLYOX + OPhDD + HO2                                                                | ARR3 | 1.12E+09  | 1.7     | 1644.0 |
| B5.1-008 | 1ONaEpoX      | → 1OPhDEnoL                                                                          | ARR3 | 1.12E+09  | 1.7     | 2301.0 |
| B5.1-009 | 1OPhDEnoL     | → OPhDD + 2DC                                                                        | ARR3 | 1.12E+09  | 1.7     | 4830.9 |

**BLOCK 5.2: 2ONaOpar CHEMISTRY (PARA RO2)**

|          |                |                                                                                         |          |           |         |        |
|----------|----------------|-----------------------------------------------------------------------------------------|----------|-----------|---------|--------|
| B5.2-001 | 2ONaOpar + NO  | → 0.82 1ONaOpar + 0.18 ONaONpar +<br>0.82 NO2                                           | ARR2     | 2.7E-12   | -360.0  |        |
| B5.2-002 | 2ONaOpar + HO2 | → ONaOHpar                                                                              | ARR2     | 2.577E-13 | -1300.0 |        |
| B5.2-003 | 2ONaOpar + NO3 | → 1ONaOpar + NO2                                                                        | ARR2     | 8.90E-12  | 390.0   |        |
| B5.2-004 | 2ONaOpar + MO2 | → 0.60 1ONaOpar + 0.20 ONaOOpar +<br>0.20 ONaOKpar + 0.60 HO2 +<br>0.80 CH2O + 0.20 MOH | ARR2     | 1.00E-13  | -663.59 |        |
| B5.2-005 | 1ONaOpar       | → ONaOKpar + HO2                                                                        | ARR1(O2) | 2.50E-14  | 300.0   |        |
| B5.2-006 | ONaOKpar + HO  | → 0.225 ONaQuin + 0.775 2ONaOOK +<br>0.225 HO2                                          | ARR1     | 8.80E-11  |         |        |
| B5.2-007 | 2ONaOOK + NO   | → 0.875 1ONaOOK + 0.125 ONaNOOK +<br>0.875 NO2                                          | ARR2     | 2.7E-12   | -360.0  |        |
| B5.2-008 | 2ONaOOK + HO2  | → ONaHOOK                                                                               | ARR2     | 2.659E-13 | -1300.0 |        |
| B5.2-009 | 2ONaOOK + NO3  | → 1ONaOOK + NO2                                                                         | ARR2     | 8.90E-12  | 390.0   |        |
| B5.2-010 | 2ONaOOK + MO2  | → 0.60 1ONaOOK + 0.20 ONaOOOK +<br>0.20 ONaOOKK + 0.60 HO2 +<br>0.80 CH2O + 0.20 MOH    | ARR2     | 1.03E-13  | -791.0  |        |
| B5.2-011 | 1NaOOK         | → OPhODKD + HO2                                                                         | ARR3     | 1.12E+09  | 1.7     | 2301.0 |

**BLOCK 5.3: 2ONaOort CHEMISTRY (ORTHO R02)**

|          |                |                                                                                                 |           |            |            |
|----------|----------------|-------------------------------------------------------------------------------------------------|-----------|------------|------------|
| B5.3-001 | 2ONaOort + NO  | → 0.875 1ONaOort + 0.125 ONaONort + 0.875 NO2                                                   | ARR2      | 2.7E-12    | -360.0     |
| B5.3-002 | 2ONaOort + HO2 | → ONaOHort                                                                                      | ARR2      | 2.659E-13  | -1300.0    |
| B5.3-003 | 2ONaOort + NO3 | → 1ONaOort + NO2                                                                                | ARR2      | 8.90E-12   | 390.0      |
| B5.3-004 | 2ONaOort + MO2 | → 0.60 1ONaOort + 0.20 ONaOOort + 0.20 ONaOKort + 0.60 HO2 + 0.80 CH2O + 0.20 MOH               | ARR2      | 1.03E-13   | -791.0     |
| B5.3-005 | 2ONaOort       | → ONaOPEN + HO                                                                                  | ARR2      | 1.90E11    | 9750.0     |
| B5.3-006 | 1ONaOort       | → ONaOPEN + HO2                                                                                 | ARR3      | 1.12E+09   | 1.7 2301.0 |
| B5.3-007 | ONaOPEN + HO   | → 0.52 2OPhDOD + 0.48 4ONaOPEN                                                                  | ARR1      | 6.50E-11   |            |
| B5.3-008 | ONaOPEN        | → 3OPhU + CO + HO2                                                                              | PHOTO     | 2.2690E-05 |            |
| B5.3-009 | ONaOPEN        | → OPhDD + 2.0 CO + 2.0 HO2                                                                      | PHOTO     | 6.4685E-06 |            |
| B5.3-010 | ONaOPEN        | → 5OPhDCrg + CO                                                                                 | PHOTO     | 6.2783E-06 |            |
| B5.3-011 | ONaOPEN        | → 4ONaOPEN + HO2                                                                                | PHOTO     | 6.2783E-06 |            |
| B5.3-012 | 5OPhDCrg       | → 0.625 OPhDCA + 0.375 OPhDCD + 0.375 H2O2                                                      | ARR1(H2O) | 1.205E-14  |            |
| B5.3-013 | 5OPhDCrg       | → OPhDCD + HO                                                                                   | ARR1      | 0.114E+03  |            |
| B5.3-014 | 2OPhDOD + NO   | → 0.810 1OPhDOD + 0.190 OPhDNOD + 0.810 NO2                                                     | ARR2      | 2.7E-12    | -360.0     |
| B5.3-015 | 2OPhDOD + NO3  | → 1OPhDOD + NO2                                                                                 | ARR2      | 8.90E-12   | 390.0      |
| B5.3-016 | 2OPhDOD + HO2  | → OPhDHOD                                                                                       | ARR2      | 2.66E-13   | -1300.0    |
| B5.3-017 | 2OPhDOD + MO2  | → 0.60 1OPhDOD + 0.20 OPhDOOD + 0.20 OPhDKOD + 0.60 HO2 + 0.80 CH2O + 0.20 MOH                  | ARR2      | 1.03E-13   | -1031.0    |
| B5.3-018 | 2OPhDOD + HO   | → 1OPhDOD + HO2                                                                                 | ARR2      | 3.70E-11   | -350.0     |
| B5.3-019 | 4ONaOPEN       | → 0.40 2OPhUEst + 0.60 3OPhUD                                                                   | ARR1      | 1.00E+06   |            |
| B5.3-020 | 2OPhUEst + NO  | → 1OPhUEst + NO2                                                                                | ARR2      | 2.7E-12    | -360.0     |
| B5.3-021 | 2OPhUEst + HO2 | → 0.460 OPhUAnhy + 0.20 HO + 0.20 HO2                                                           | ARR2      | 2.62E-13   | -1300.0    |
| B5.3-022 | 2OPhUEst + NO3 | → 1OPhUEst + NO2                                                                                | ARR2      | 8.90E-12   | 390.0      |
| B5.3-023 | 2OPhUEst + MO2 | → 0.60 1OPhUEst + 0.20 OPhUAnhy + 0.60 HO2 + 0.80 CH2O + 0.20 MOH                               | ARR2      | 1.03E-13   | -955.0     |
| B5.3-024 | 1OPhUEst       | → OPhUAnhy + HO2                                                                                | ARR2(O2)  | 2.5E-14    | 300.0      |
| B5.3-025 | 1OPhUEst       | → 3OPhUA                                                                                        | ARR3      | 8.00E+10   | 1.7 3723.0 |
| B5.3-026 | 3OPhUA + NO    | → 1OPhDUA + NO2                                                                                 | ARR2      | 7.50E-12   | -290.0     |
| B5.3-027 | 3OPhUA + NO2   | →                                                                                               | ARR3      | 6.143E-09  | -1.1 0.0   |
| B5.3-028 | 3OPhUA + NO3   | → 1OPhDUA + NO2                                                                                 | ARR2      | 8.90E-12   | 305.0      |
| B5.3-029 | 3OPhUA + HO2   | → 0.15 OPhAUA + 0.20 1OPhDUA + 0.15 O3 + 0.20 HO                                                | ARR2      | 3.324E-12  | -730.0     |
| B5.3-030 | 3OPhUA + MO2   | → 0.80 1OPhDUA + 0.20 OPhAUA + CH2O + 0.80 HO2                                                  | ARR2      | 2.000E-12  | -508.0     |
| B5.3-031 | 3OPhUD + NO    | → 1OPhDUD + NO2                                                                                 | ARR2      | 7.50E-12   | -290.0     |
| B5.3-032 | 3OPhUD + NO2   | →                                                                                               | ARR3      | 6.143E-09  | -1.1 0.0   |
| B5.3-033 | 3OPhUD + NO3   | → 1OPhDUD + NO2                                                                                 | ARR2      | 8.90E-12   | 305.0      |
| B5.3-034 | 3OPhUD + HO2   | → 0.20 1OPhDUD + 0.15 O3 + 0.20 HO                                                              | ARR2      | 3.324E-12  | -730.0     |
| B5.3-035 | 3OPhUD + MO2   | → 0.80 1OPhDUD + CH2O + 0.80 HO2                                                                | ARR2      | 2.000E-12  | -508.0     |
| B5.3-036 | 1OPhDUA        | → 0.60 OPhUAnhy + 0.60 HO + 0.23 OPhAD + 0.23 CO2 + 0.23 CO + 0.23 HO2 + 0.17 2OPhUA + 0.17 CO2 | ARR1      | 1.00E+06   |            |
| B5.3-037 | 1OPhDUD        | → 0.60 OPhUAnhy + 0.60 HO2 + 0.23 3OPhU + 0.23 CO2 + 0.17 OPhDD + 0.17 CO + 0.17 CO2 + 0.17 HO2 | ARR1      | 1.00E+06   |            |
| B5.3-038 | 3OPhU + NO     | → 1OPhUD + NO2                                                                                  | ARR2      | 7.50E-12   | -290.0     |
| B5.3-039 | 3OPhU + NO3    | → 1OPhUD + NO2                                                                                  | ARR2      | 8.90E-12   | 305.0      |
| B5.3-040 | 3OPhU + HO2    | → 0.20 1OPhUD + 0.15 O3 + 0.20 HO                                                               | ARR2      | 3.324E-12  | -730.0     |
| B5.3-041 | 3OPhU + MO2    | → 0.80 1OPhUD + CH2O + 0.80 HO2                                                                 | ARR2      | 2.000E-12  | -508.0     |
| B5.3-042 | 1OPhUD         | → OPhD + CO + CO2 + HO2                                                                         | ARR1      | 1.00E+06   |            |
| B5.3-043 | 2OPhUA + NO    | → 1OPhUA + NO2                                                                                  | ARR2      | 2.7E-12    | -360.0     |
| B5.3-044 | 2OPhUA + NO2   | → 1OPhUA + NO3                                                                                  | ARR3      | 6.143E-09  | -1.1 0.0   |
| B5.3-045 | 2OPhUA + NO3   | → 1OPhUA + NO2                                                                                  | ARR2      | 8.90E-12   | 390.0      |
| B5.3-046 | 2OPhUA + HO2   | → OHPPhUA                                                                                       | ARR2      | 2.335E-13  | -1300.0    |
| B5.3-047 | 2OPhUA + MO2   | → 0.80 1OPhUA + 0.20 OOPhUA + CH2O + 0.80 HO2                                                   | ARR2      | 1.03E-13   | -398.0     |
| B5.3-048 | 1OPhUA + O3    | → 2OPhUA                                                                                        | ARR1      | 2.86E-13   |            |
| B5.3-049 | 1OPhUA + NO2   | → VOOPhUA                                                                                       | ARR1      | 2.08E-12   |            |
| B5.3-050 | 1OPhUA + HO2   | → OOPhUA                                                                                        | ARR1      | 2.30E-13   |            |
| B5.3-051 | OPhUAnhy       | → OPhAUA                                                                                        | ARR1(H2O) | 2.50E-22   |            |

**BLOCK 5.4: 4NaOOBp CHEMISTRY (PEROXY BRIDGE)**

|          |               |                                                                                |      |                     |
|----------|---------------|--------------------------------------------------------------------------------|------|---------------------|
| B5.4-001 | 4NaOOBp       | → 0.75 2NaOOBp + 0.25 1NaOEpoX                                                 | ARR1 | 1.0E+06             |
| B5.4-002 | 2NaOOBp + NO  | → 0.91 1NaOOBp + 0.09 NaOONBp + 0.91 NO2                                       | ARR2 | 2.7E-12 -360.0      |
| B5.4-003 | 2NaOOBp + HO2 | → NaOOHBp                                                                      | ARR2 | 2.447E-13 -1300.0   |
| B5.4-004 | 2NaOOBp + NO3 | → 1NaOOBp + NO2                                                                | ARR2 | 8.90E-12 390.0      |
| B5.4-005 | 2NaOOBp + MO2 | → 0.60 1NaOOBp + 0.20 NaOOOEp + 0.20 NaOOKBp + 0.60 HO2 + 0.80 CH2O + 0.20 MOH | ARR2 | 1.03E-13 -598.0     |
| B5.4-006 | 1NaOOBp       | → 1PhDOOD                                                                      | ARR3 | 1.12E+09 1.7 2413.0 |
| B5.4-007 | 1PhDOOD       | → GLYOX + PhAD + HO2                                                           | ARR3 | 1.12E+09 1.7 1644.0 |
| B5.4-008 | 1NaOEpoX      | → 1PhAEnol                                                                     | ARR3 | 1.12E+09 1.7 2301.0 |
| B5.4-009 | 1PhAEnol      | → PhAD + 2DC                                                                   | ARR3 | 1.12E+09 1.7 4830.9 |

**BLOCK 5.5: 2NaOOort CHEMISTRY**

|          |                |                                                                                                                                           |           |                      |
|----------|----------------|-------------------------------------------------------------------------------------------------------------------------------------------|-----------|----------------------|
| B5.5-001 | 2NaOOort + NO  | → 0.875 1NaOOort + 0.125 NaOONort + 0.875 NO2                                                                                             | ARR2      | 2.7E-12 -360.0       |
| B5.5-002 | 2NaOOort + HO2 | → NaOOHort                                                                                                                                | ARR2      | 2.659E-13 -1300.0    |
| B5.5-003 | 2NaOOort + NO3 | → 1NaOOort + NO2                                                                                                                          | ARR2      | 8.90E-12 390.0       |
| B5.5-004 | 2NaOOort + MO2 | → 0.60 1NaOOort + 0.20 NaOOOort + 0.20 NaOOKort + 0.60 HO2 + 0.80 CH2O + 0.20 MOH                                                         | ARR2      | 1.03E-13 -791.0      |
| B5.5-005 | 2NaOOort       | → NaOPENOL + HO                                                                                                                           | ARR2      | 1.90E11 9750.0       |
| B5.5-006 | 1NaOOort       | → NaOPENOL + HO2                                                                                                                          | ARR3      | 1.12E+09 1.7 2301.0  |
| B5.5-007 | NaOPENOL + HO  | → 0.33 4NaOPENOL + 0.38 PhDKOD + 0.38 HO2 + 0.22 2PhDKD + 0.07 2PhDOOD                                                                    | ARR1      | 9.60E-11             |
| B5.5-008 | 2PhDOOD + NO   | → 0.82 1PhDOOD1 + 0.18 PhDOOND + 0.82 NO2                                                                                                 | ARR2      | 2.7E-12 -360.0       |
| B5.5-009 | 2PhDOOD + HO2  | → PhDOOHD                                                                                                                                 | ARR2      | 2.688E-13 -1300.0    |
| B5.5-010 | 2PhDOOD + NO3  | → 1PhDOOD1 + NO2                                                                                                                          | ARR2      | 8.90E-12 390.0       |
| B5.5-011 | 2PhDOOD + MO2  | → 0.60 1PhDOOD1 + 0.20 PhDOOKD + 0.20 PhDOOOD + 0.60 HO2 + 0.80 CH2O + 0.20 MOH                                                           | ARR2      | 1.03E-13 -791.0      |
| B5.5-012 | 1PhDOOD1       | → PhDOOD1 + CO + HO2                                                                                                                      | ARR3      | 1.120E+09 1.7 3572.0 |
| B5.5-013 | PhDOOD1 + HO   | → 0.60 PhOOAnhy + 0.36 HO2 + 0.24 HO + 0.20 PhA + 0.40 CO2 + 0.20 HO2 + 0.12 PhAD + 0.12 CO2 + 0.12 HO2 + 0.08 PhAA + 0.08 CO2 + 0.08 HO2 | ARR1      | 2.7E-11              |
| B5.5-014 | PhOOAnhy       | → PhAOOA                                                                                                                                  | ARR1(H2O) | 2.50E-22             |
| B5.5-015 | 2PhDKD + NO    | → 0.91 1PhDKD + 0.09 PhDKND + 0.91 NO2                                                                                                    | ARR2      | 2.7E-12 -360.0       |
| B5.5-016 | 2PhDKD + HO2   | → 0.52 PhDKHD + 0.48 1PhDKD + 0.48 HO                                                                                                     | ARR2      | 2.659E-13 -1300.0    |
| B5.5-017 | 2PhDKD + NO3   | → 1PhDKD + NO2                                                                                                                            | ARR2      | 8.90E-12 390.0       |
| B5.5-018 | 2PhDKD + MO2   | → 0.80 1PhDKD + 0.20 PhDKOD + 0.80 HO2 + CH2O                                                                                             | ARR2      | 1.03E-13 -894.0      |
| B5.5-019 | 1PhDKD         | → 0.50 3PhD + 0.50 GLYOX + 0.50 PhKDD + 0.5 HO2 + 0.5 CO                                                                                  | ARR3      | 1.120E+09 1.7 4378.0 |
| B5.5-020 | 4NaOPENOL      | → 0.40 2PhOUEst + 0.60 3PhOUD                                                                                                             | ARR1      | 1.00E+06             |
| B5.5-021 | 2PhOUEst + NO  | → 1PhOUEst + NO2                                                                                                                          | ARR2      | 2.7E-12 -360.0       |
| B5.5-022 | 2PhOUEst + HO2 | → 0.540 PhOUHEst + 0.460 PhOUAnhy + 0.20 HO + 0.20 HO2                                                                                    | ARR2      | 2.62E-13 -1300.0     |
| B5.5-023 | 2PhOUEst + NO3 | → 1PhOUEst + NO2                                                                                                                          | ARR2      | 8.90E-12 390.0       |
| B5.5-024 | 2PhOUEst + MO2 | → 0.60 1PhOUEst + 0.20 PhOUAnhy + 0.20 PhOUOEst + 0.60 HO2 + 0.80 CH2O + 0.20 MOH                                                         | ARR2      | 1.03E-13 -955.0      |
| B5.5-025 | 1PhOUEst       | → PhOUAnhy + HO2                                                                                                                          | ARR2(O2)  | 2.5E-14 300.0        |
| B5.5-026 | 1PhOUEst       | → 3PhOUA                                                                                                                                  | ARR3      | 8.00E+10 1.7 3723.0  |
| B5.5-027 | 3PhOUA + NO    | → 1PhDOUA + NO2                                                                                                                           | ARR2      | 7.50E-12 -290.0      |
| B5.5-028 | 3PhOUA + NO2   | → PhPOUA                                                                                                                                  | ARR3      | 6.143E-09 -1.1 0.0   |
| B5.5-029 | 3PhOUA + NO3   | → 1PhDOUA + NO2                                                                                                                           | ARR2      | 8.90E-12 305.0       |
| B5.5-030 | 3PhOUA + HO2   | → 0.65 PhGOUA + 0.15 PhAOUA + 0.20 1PhDOUA + 0.15 O3 + 0.20 HO                                                                            | ARR2      | 3.324E-12 -730.0     |
| B5.5-031 | 3PhOUA + MO2   | → 0.80 1PhDOUA + 0.20 PhAOUA + CH2O + 0.80 HO2                                                                                            | ARR2      | 2.000E-12 -508.0     |
| B5.5-032 | 3PhOUD + NO    | → 1PhDOUD + NO2                                                                                                                           | ARR2      | 7.50E-12 -290.0      |
| B5.5-033 | 3PhOUD + NO2   | → PhPOUD                                                                                                                                  | ARR3      | 6.143E-09 -1.1 0.0   |

|          |              |                                                                                                         |           |           |          |
|----------|--------------|---------------------------------------------------------------------------------------------------------|-----------|-----------|----------|
| B5.5-034 | 3PhOUD + NO3 | → 1PhDOUD + NO2                                                                                         | ARR2      | 8.90E-12  | 305.0    |
| B5.5-035 | 3PhOUD + HO2 | → 0.65 PhGOUD + 0.15 PhAOUD +<br>0.20 1PhDOUD + 0.15 O3 + 0.20 HO                                       | ARR2      | 3.324E-12 | -730.0   |
| B5.5-036 | 3PhOUD + MO2 | → 0.80 1PhDOUD + 0.20 PhAOUD +<br>CH2O + 0.80 HO2                                                       | ARR2      | 2.000E-12 | -508.0   |
| B5.5-037 | 1PhDOUA      | → 0.60 PhOUAnhy + 0.60 HO +<br>0.23 PhAA + 0.23 CO2 + 0.23 HO2 +<br>0.23 CO + 0.17 2PhOUA + 0.17 CO2    | ARR1      | 1.00E+06  |          |
| B5.5-038 | 1PhDOUD      | → 0.60 PhOUAnhy + 0.60 HO2 +<br>0.23 3PhOU + 0.23 CO2 +<br>0.17 PhAD + 0.17 CO + 0.17 CO2 +<br>0.17 HO2 | ARR1      | 1.00E+06  |          |
| B5.5-039 | 2PhOUA + NO  | → 1PhOUA + NO2                                                                                          | ARR2      | 2.7E-12   | -360.0   |
| B5.5-040 | 2PhOUA + NO2 | → 1PhOUA + NO3                                                                                          | ARR3      | 6.143E-09 | -1.1 0.0 |
| B5.5-041 | 2PhOUA + NO3 | → 1PhOUA + NO2                                                                                          | ARR2      | 8.90E-12  | 390.0    |
| B5.5-042 | 2PhOUA + HO2 | → HPhOUA                                                                                                | ARR2      | 2.335E-13 | -1300.0  |
| B5.5-043 | 2PhOUA + MO2 | → 0.80 1PhOUA + 0.20 OPhOUA +<br>CH2O + 0.80 HO2                                                        | ARR2      | 1.03E-13  | -398.0   |
| B5.5-044 | 1PhOUA + O3  | → 2PhOUA                                                                                                | ARR1      | 2.86E-13  |          |
| B5.5-045 | 1PhOUA + NO2 | → VOPhOUA                                                                                               | ARR1      | 2.08E-12  |          |
| B5.5-046 | 1PhOUA + HO2 | → OPhOUA                                                                                                | ARR1      | 2.30E-13  |          |
| B5.5-047 | 3PhOU + NO   | → 1PhOUD + NO2                                                                                          | ARR2      | 7.50E-12  | -290.0   |
| B5.5-048 | 3PhOU + NO2  | → PhOUP                                                                                                 | ARR3      | 6.143E-09 | -1.1 0.0 |
| B5.5-049 | 3PhOU + NO3  | → 1PhOUD + NO2                                                                                          | ARR2      | 8.90E-12  | 305.0    |
| B5.5-050 | 3PhOU + HO2  | → 0.65 PhOUG + 0.15 PhOUA +<br>0.20 1PhOUD + 0.15 O3 + 0.20 HO                                          | ARR2      | 3.324E-12 | -730.0   |
| B5.5-051 | 3PhOU + MO2  | → 0.80 1PhOUD + 0.20 PhOUA +<br>CH2O + 0.80 HO2                                                         | ARR2      | 2.000E-12 | -508.0   |
| B5.5-052 | 1PhOUD       | → PhA + HO2 + CO2 + CO                                                                                  | ARR1      | 1.00E+06  |          |
| B5.5-053 | PhOUAnhy     | → PhAOUA                                                                                                | ARR1(H2O) | 2.50E-22  |          |

---

**BLOCK 5.6: NaOKort CHEMISTRY**

|          |               |                                                                                    |       |            |                |
|----------|---------------|------------------------------------------------------------------------------------|-------|------------|----------------|
| B5.6-001 | NaOKort + HO  | → 0.215 NaKK + 0.785 2NaOOK2 +<br>0.215 HO2                                        | ARR2  | 1.54E-11   | -540.0         |
| B5.6-002 | NaKK + HO     | → 2NaOKK                                                                           | ARR2  | 7.075E-12  | -540.0         |
| B5.6-003 | 2NaOKK + NO   | → 0.875 1NaOKK + 0.125 NaOKKN +<br>0.875 NO2                                       | ARR2  | 2.7E-12    | -360.0         |
| B5.6-004 | 2NaOKK + HO2  | → NaOKKH                                                                           | ARR2  | 2.659E-13  | -1300.0        |
| B5.6-005 | 2NaOKK + NO3  | → 1NaOKK + NO2                                                                     | ARR2  | 8.90E-12   | 390.0          |
| B5.6-006 | 2NaOKK + MO2  | → 0.60 1NaOKK + 0.20 NaOOKK +<br>0.20 NaOKKK + 0.60 HO2 +<br>0.80 CH2O + 0.20 MOH  | ARR2  | 1.03E-13   | -894.0         |
| B5.6-007 | 1NaOKK        | → 0.815 PhDKKD + 0.185 3PhO +<br>0.815 HO2 + 0.37 CO                               | ARR3  | 1.120E+09  | 1.7<br>2301.70 |
| B5.6-008 | 2NaOOK2 + NO  | → 0.875 1NaOOK2 + 0.125 NaNOOK +<br>0.875 NO2                                      | ARR2  | 2.7E-12    | -360.0         |
| B5.6-009 | 2NaOOK2 + HO2 | → NaHOOK                                                                           | ARR2  | 2.659E-13  | -1300.0        |
| B5.6-010 | 2NaOOK2 + NO3 | → 1NaOOK2 + NO2                                                                    | ARR2  | 8.90E-12   | 390.0          |
| B5.6-011 | 2NaOOK2 + MO2 | → 0.60 1NaOOK2 + 0.20 NaOOOK +<br>0.20 NaOOKK + 0.60 HO2 +<br>0.80 CH2O + 0.20 MOH | ARR2  | 1.03E-13   | -791.0         |
| B5.6-012 | 1NaOOK2       | → 0.322 PhODKD + 0.778 PhDKOD + HO2                                                | ARR3  | 1.120E+09  | 1.7<br>2301.70 |
| B5.6-013 | NaOKort + NO3 | → 2NaKON                                                                           | ARR1  | 3.04E-13   |                |
| B5.6-014 | 2NaKON + NO   | → 0.875 1NaKON + 0.125 NaNKON +<br>0.875 NO2                                       | ARR2  | 2.7E-12    | -360.0         |
| B5.6-015 | 2NaKON + HO2  | → NaHKON                                                                           | ARR2  | 2.659E-13  | -1300.0        |
| B5.6-016 | 2NaKON + NO3  | → 1NaKON + NO2                                                                     | ARR2  | 8.90E-12   | 390.0          |
| B5.6-017 | 2NaKON + MO2  | → 0.60 1NaKON + 0.20 NaOKON +<br>0.20 NaKKON + 0.60 HO2 +<br>0.80 CH2O + 0.20 MOH  | ARR2  | 1.03E-13   | -791.0         |
| B5.6-018 | 1NaKON        | → 0.5 PhNDKD + 0.5 PhDKOD +<br>0.5 HO2 + 0.5 NO2                                   | ARR3  | 1.120E+09  | 1.7<br>2301.70 |
| B5.6-019 | PhNDKD + HO   | → 0.5 PhKDD + 0.5 3PhND +<br>CO + 0.5 NO2                                          | ARR1  | 2.71E-11   |                |
| B5.6-020 | PhNDKD + NO3  | → 0.5 PhKDKD + 0.375 PhKDD +<br>0.125 3PhND + HNO3 +<br>0.875 NO2 + 0.5 CO         | ARR1  | 3.17E-14   |                |
| B5.6-021 | PhNDKD        | → PhKDD + NO2 + CO + HO2                                                           | PHOTO | 8.2072E-07 |                |

|          |             |                                                                                    |       |                    |
|----------|-------------|------------------------------------------------------------------------------------|-------|--------------------|
| B5.6-022 | PhNDKD      | → PhKDD + CO + NO2 + HO2                                                           | PHOTO | 5.6804E-06         |
| B5.6-023 | PhNDKD      | → 3PhND + CO + HO2                                                                 | PHOTO | 8.1954E-05         |
| B5.6-024 | 3PhND + NO  | → 3PhN + NO2 + CO2                                                                 | ARR2  | 7.50E-12 -290.0    |
| B5.6-025 | 3PhND + HO2 | → 0.65 PhGND + 0.15 PhAND +<br>0.20 3PhN + 0.15 O3 +<br>0.20 CO2 + 0.20 HO         | ARR2  | 3.149E-12 -730.0   |
| B5.6-026 | 3PhND + NO3 | → 3PhN + NO2 + CO2                                                                 | ARR2  | 8.90E-12 -305.0    |
| B5.6-027 | 3PhND + MO2 | → 0.80 3PhN + 0.20 PhAND +<br>CH2O + 0.80 CO2 + 0.80 HO2                           | ARR2  | 2.000E-12 -508.0   |
| B5.6-028 | 3PhND + NO2 | → PhPND                                                                            | ARR3  | 6.143E-09 -1.1 0.0 |
| B5.6-029 | 3PhN + NO   | → PhD + 2.0 NO2 + CO2                                                              | ARR2  | 7.50E-12 -290.0    |
| B5.6-030 | 3PhN + HO2  | → 0.50 PhD + 0.13 PhNA + 0.37 PhNG +<br>0.13 O3 + 0.50 CO2 +<br>0.50 HO + 0.50 NO2 | ARR2  | 3.149E-12 -730.0   |
| B5.6-031 | 3PhN + NO3  | → PhD + 2.0 NO2 + CO2                                                              | ARR2  | 8.90E-12 -305.0    |
| B5.6-032 | 3PhN + MO2  | → 0.80 PhD + 0.20 PhNA + CH2O +<br>0.80 CO2 + 0.80 HO2 + 0.80 NO2                  | ARR2  | 2.000E-12 -508.0   |
| B5.6-033 | 3PhN + NO2  | → PhNP                                                                             | ARR3  | 6.143E-09 -1.1 0.0 |

**BLOCK 6: PhDD CHEMISTRY**

|        |              |                                                                                   |           |                     |
|--------|--------------|-----------------------------------------------------------------------------------|-----------|---------------------|
| B6-001 | PhDD + HO    | → 0.40 2PhEst + 0.60 3PhD                                                         | ARR1      | 2.63E-11            |
| B6-002 | PhDD         | → 0.40 2PhEst + 0.60 3PhD + HO2                                                   | PHOTO     | 5.6804E-06          |
| B6-003 | PhDD         | → 0.40 2PhEst + 0.60 3PhD + HO2                                                   | PHOTO     | 5.6804E-06          |
| B6-004 | PhAD + HO    | → 3PhA                                                                            | ARR1      | 1.38E-11            |
| B6-005 | 2PhEst + NO  | → 1PhEst + NO2                                                                    | ARR2      | 2.7E-12 -360.0      |
| B6-006 | 2PhEst + HO2 | → 0.540 PhEstH + 0.460 PhAnhy +<br>0.20 HO + 0.20 HO2                             | ARR2      | 2.62E-13 -1300.0    |
| B6-007 | 2PhEst + NO3 | → 1PhEst + NO2                                                                    | ARR2      | 8.90E-12 390.0      |
| B6-008 | 2PhEst + MO2 | → 0.60 1PhEst + 0.20 PhAnhy +<br>0.20 PhEstO + 0.60 HO2 +<br>0.80 CH2O + 0.20 MOH | ARR2      | 1.03E-13 -1010.0    |
| B6-009 | 1PhEst       | → 3PhA                                                                            | ARR3      | 8.00E+10 1.7 3723.0 |
| B6-010 | 3PhA + NO    | → 1PhDA + NO2                                                                     | ARR2      | 7.50E-12 -290.0     |
| B6-011 | 3PhA + HO2   | → 0.65 PhGA + 0.15 PhAA +<br>0.20 1PhDA + 0.15 O3 + 0.20 HO                       | ARR2      | 3.149E-12 -730.0    |
| B6-012 | 3PhA + NO3   | → 1PhDA + NO2                                                                     | ARR2      | 8.90E-12 305.0      |
| B6-013 | 3PhA + MO2   | → 0.80 1PhDA + 0.20 PhAA +<br>CH2O + 0.80 HO2                                     | ARR2      | 2.000E-12 -508.0    |
| B6-014 | 3PhA + NO2   | → PhPA                                                                            | ARR3      | 6.143E-09 -1.1 0.0  |
| B6-015 | 1PhDA        | → 0.60 PhAnhy + 0.60 HO +<br>0.40 2PhA + 0.40 CO2                                 | ARR1      | 1.00E+06            |
| B6-016 | 2PhA + NO    | → 1PhA + NO2                                                                      | ARR2      | 2.7E-12 -360.0      |
| B6-017 | 2PhA + HO2   | → HPhA                                                                            | ARR2      | 2.335E-13 -1300.0   |
| B6-018 | 2PhA + NO3   | → 1PhA + NO2                                                                      | ARR2      | 8.90E-12 390.0      |
| B6-019 | 2PhA + MO2   | → 0.80 1PhA + 0.20 OPhA +<br>CH2O + 0.80 HO2                                      | ARR2      | 1.03E-13 -398.0     |
| B6-020 | 2PhA + NO2   | → 1PhA + NO3                                                                      | ARR3      | 6.143E-09 -1.1 0.0  |
| B6-021 | 1PhA + O3    | → 2PhA                                                                            | ARR1      | 2.86E-13            |
| B6-022 | 1PhA + NO2   | → VOPhA                                                                           | ARR1      | 2.08E-12            |
| B6-023 | 1PhA + HO2   | → OPhA                                                                            | ARR1      | 2.30E-13            |
| B6-024 | 3PhD + NO    | → 1PhDD + NO2                                                                     | ARR2      | 7.50E-12 -290.0     |
| B6-025 | 3PhD + HO2   | → 0.65 PhGD + 0.15 PhAD +<br>0.20 1PhDD + 0.15 O3 + 0.20 HO                       | ARR2      | 3.149E-12 -730.0    |
| B6-026 | 3PhD + NO3   | → 1PhDD + NO2                                                                     | ARR2      | 8.90E-12 -305.0     |
| B6-027 | 3PhD + MO2   | → 0.80 1PhDD + 0.20 PhAD +<br>CH2O + 0.80 HO2                                     | ARR2      | 2.000E-12 -508.0    |
| B6-028 | 3PhD + NO2   | → PhPD                                                                            | ARR3      | 6.143E-09 -1.1 0.0  |
| B6-029 | 1PhDD        | → 0.40 2PhD + 0.60 PhAnhy +<br>0.40 CO2 + 0.60 HO2                                | ARR1      | 1.00E+06            |
| B6-030 | 2PhD + NO    | → 1PhD + NO2                                                                      | ARR2      | 2.7E-12 -360.0      |
| B6-031 | 2PhD + HO2   | → HPhD                                                                            | ARR2      | 2.335E-13 -1300.0   |
| B6-032 | 2PhD + NO3   | → 1PhD + NO2                                                                      | ARR2      | 8.90E-12 390.0      |
| B6-033 | 2PhD + MO2   | → 0.80 1PhD + 0.20 OPhD +<br>CH2O + 0.80 HO2                                      | ARR2      | 1.03E-13 -398.0     |
| B6-034 | 2PhD + NO2   | → 1PhD + NO3                                                                      | ARR3      | 6.143E-09 -1.1 0.0  |
| B6-035 | 1PhD + O3    | → 2PhD                                                                            | ARR1      | 2.86E-13            |
| B6-036 | 1PhD + NO2   | → VOPhD                                                                           | ARR1      | 2.08E-12            |
| B6-037 | 1PhD + HO2   | → OPhD                                                                            | ARR1      | 2.30E-13            |
| B6-038 | PhAnhy       | → PhAA                                                                            | ARR1(H2O) | 2.50E-22            |

---

**BLOCK 7: NaOO CHEMISTRY**

|        |                |                                                       |      |                     |
|--------|----------------|-------------------------------------------------------|------|---------------------|
| B7-001 | NaOO + HO      | → 0.23 NaOOO + 0.23 HO2 +<br>0.07 1NaO + 0.70 2NaOOO  | ARR1 | 4.955E-10           |
| B7-002 | 1NaO + O3      | → 2NaO                                                | ARR1 | 2.86E-13            |
| B7-003 | 1NaO + NO2     | → NaVOO                                               | ARR1 | 2.08E-12            |
| B7-004 | 1NaO + HO2     | → NaOO                                                | ARR1 | 2.30E-13            |
| B7-005 | 2NaO + NO      | → 1NaO + NO2                                          | ARR2 | 2.7E-12 -360.0      |
| B7-006 | 2NaO + NO2     | → 1NaO + NO3                                          | ARR3 | 6.143E-09 -1.1 0.00 |
| B7-007 | 2NaO + NO3     | → 1NaO + NO2                                          | ARR2 | 8.90E-12 390.0      |
| B7-008 | 2NaO + HO2     | → NaHO                                                | ARR2 | 2.096E-13 -1300.0   |
| B7-009 | 2NaO + MO2     | → 0.80 1NaO + 0.20 NaOO +<br>CH2O + 0.80 HO2          | ARR2 | 1.03E-13 -324.0     |
| B7-010 | 2NaOOO         | → 0.25 NaOOK + 0.25 HO2 +<br>0.75 2NaOOOBp            | ARR1 | 1.0E+06             |
| B7-011 | 2NaOOOBp       | → NaOOKBp + HO2                                       | ARR2 | 5.60E12 6010.0      |
| B7-012 | 2NaOOOBp + NO  | → 0.91 1NaOOOBp + 0.09 NaOOONBp +<br>0.91 NO2         | ARR2 | 2.7E-12 -360.0      |
| B7-013 | 2NaOOOBp + HO2 | → NaOOOHBp                                            | ARR2 | 2.447E-13 -1300.0   |
| B7-014 | 2NaOOOBp + NO3 | → 1NaOOOBp + NO2                                      | ARR2 | 8.90E-12 390.0      |
| B7-015 | 2NaOOOBp + MO2 | → 0.80 1NaOOOBp + 0.20 NaOOOObp +<br>CH2O + 0.80 HO2  | ARR2 | 1.03E-13 -598.0     |
| B7-016 | 1NaOOOBp       | → 1PhAOOD                                             | ARR3 | 1.12E+09 1.7 2413.0 |
| B7-017 | 1PhAOOD        | → 0.5 GLYOX + 0.5 PhAA + 0.5 GLYA +<br>0.5 PhAD + HO2 | ARR3 | 1.12E+09 1.7 1644.0 |

---

**BLOCK 8: C2 AND C1 CHEMISTRY**

|        |             |                                                                            |       |                         |
|--------|-------------|----------------------------------------------------------------------------|-------|-------------------------|
| B8-001 | 2DC + NO    | → 1DC + NO2                                                                | ARR2  | 2.7E-12 -360.0          |
| B8-002 | 2DC + HO2   | → DH                                                                       | ARR2  | 1.396E-13 -1300.0       |
| B8-003 | 2DC + NO3   | → 1DC + NO2                                                                | ARR2  | 8.90E-12 390.0          |
| B8-004 | 2DC + MO2   | → 0.60 1DC + 0.20 GLYOX + 0.20 DO +<br>0.60 HO2 + 0.80 CH2O + 0.20 MOH     | ARR2  | 1.03E-13 -558.0         |
| B8-005 | 1DC         | → CH2O + CO + HO2                                                          | ARR3  | 1.120E+09 1.7<br>4730.3 |
| B8-006 | DH + HO     | → 0.21 GLYOX + HO                                                          | ARR1  | 1.32E-11                |
| B8-007 | DO + HO     | → 0.27 GLYOX + HO2                                                         | ARR1  | 1.02E-11                |
| B8-008 | DO + NO3    | → GLYOX + HNO3 + HO2                                                       | ARR1  | 6.84E-14                |
| B8-009 | GLYOX + HO  | → 0.30 3GLY + 1.4 CO + 0.70 HO2                                            | ARR2  | 2.17E-12 -340.0         |
| B8-010 | GLYOX + NO3 | → 0.30 3GLY + HNO3 + 1.4 CO + 0.70 HO2                                     | ARR2  | 2.80E-12 2375.0         |
| B8-011 | GLYOX       | → 2.0 CO                                                                   | PHOTO | 1.9242E-06              |
| B8-012 | GLYOX       | → 2.0 CO + 2.0 HO2                                                         | PHOTO | 2.9389E-05              |
| B8-013 | GLYOX       | → CH2O + CO                                                                | PHOTO | 1.0377E-05              |
| B8-014 | 3GLY + NO   | → CO + CO2 + HO2 + NO2                                                     | ARR2  | 7.50E-12 -290.0         |
| B8-015 | 3GLY + NO2  | → CO + CO2 + HO2 + NO3                                                     | ARR3  | 6.143E-09 -1.1 0.0      |
| B8-016 | 3GLY + NO3  | → CO + CO2 + HO2 + NO2                                                     | ARR2  | 8.90E-12 305.0          |
| B8-017 | 3GLY + HO2  | → 0.37 GLYG + 0.13 GLYA + 0.5 CO +<br>0.5 CO2 + 0.5 HO + 0.5 HO2 + 0.13 O3 | ARR2  | 2.105E-12 -730.0        |
| B8-018 | 3GLY + MO2  | → 0.8 CO + 0.8 CO2 + 0.20 GLYA +<br>CH2O + 1.60 HO2                        | ARR2  | 2.000E-12 -508.0        |
| B8-019 | GLYG + HO   | → 0.193 3GLY + 0.807 HO2 + 1.614 CO                                        | ARR1  | 1.60E-11                |
| B8-020 | GLYG        | → CHOOH + CO2                                                              | PHOTO | 3.2745E-04              |
| B8-021 | GLYG        | → CO + CO2                                                                 | PHOTO | 2.7778E-05              |
| B8-022 | GLYA + HO   | → 2.0 CO + HO                                                              | ARR1  | 1.34E-11                |
| B8-023 | GLYA        | → CH2O + CO2                                                               | PHOTO | 3.2745E-04              |
| B8-024 | GLYA        | → 2.0 CO                                                                   | PHOTO | 2.7778E-05              |
| B8-025 | CHOOH + HO  | → CO2 + HO2                                                                | ARR1  | 4.50E-13                |
| B8-026 | CH2O + HO   | → HO2 + CO                                                                 | ARR2  | 8.60E-12 -20.0          |
| B8-027 | CH2O + NO3  | → HO2 + HNO3 + CO                                                          | ARR2  | 2.00E-12 2440.0         |
| B8-028 | CH2O        | → 2.0 HO2 + CO                                                             | PHOTO | 1.1868E-05              |
| B8-029 | CH2O        | → CO                                                                       | PHOTO | 4.9249E-05              |

---

**BLOCK 9: LOSS REACTIONS**

|        |               |   |      |          |
|--------|---------------|---|------|----------|
| B9-001 | NaVO + HO     | → | ARR1 | 2.60E-11 |
| B9-002 | NaH + HO      | → | ARR1 | 7.80E-11 |
| B9-003 | NaONpar + HO  | → | ARR1 | 1.34E-10 |
| B9-004 | NaOHpar + O3  | → | ARR1 | 1.15E-17 |
| B9-005 | NaONpar + NO3 | → | ARR1 | 3.05E-13 |
| B9-006 | NaOHpar + HO  | → | ARR1 | 1.92E-10 |
| B9-007 | NaOHpar + O3  | → | ARR1 | 2.62E-16 |
| B9-008 | NaOHpar + NO3 | → | ARR1 | 3.05E-13 |

|        |                                       |                            |      |          |          |
|--------|---------------------------------------|----------------------------|------|----------|----------|
| B9-009 | NaOOp <sub>ar</sub> + HO              | →                          | ARR1 | 3.29E-10 |          |
| B9-010 | NaOOp <sub>ar</sub> + O <sub>3</sub>  | →                          | ARR1 | 3.67E-16 |          |
| B9-011 | NaOOp <sub>ar</sub> + NO <sub>3</sub> | →                          | ARR1 | 2.73E-13 |          |
| B9-012 | NaOKp <sub>ar</sub> + O <sub>3</sub>  | →                          | ARR1 | 5.24E-18 |          |
| B9-013 | NaOKp <sub>ar</sub> + NO <sub>3</sub> | →                          | ARR1 | 7.96E-15 |          |
| B9-014 | NaQuin + HO                           | →                          | ARR1 | 3.17E-11 |          |
| B9-015 | NaNOOK + HO                           | →                          | ARR1 | 8.13E-12 |          |
| B9-016 | NaNOOK + NO <sub>3</sub>              | →                          | ARR1 | 5.30E-15 |          |
| B9-017 | NaHOOK + HO                           | →                          | ARR1 | 4.11E-11 |          |
| B9-018 | NaHOOK + NO <sub>3</sub>              | →                          | ARR1 | 5.30E-15 |          |
| B9-019 | NaOOOK + HO                           | →                          | ARR1 | 4.93E-11 |          |
| B9-020 | NaOOOK + NO <sub>3</sub>              | →                          | ARR1 | 9.95E-15 |          |
| B9-021 | NaOOKK + HO                           | →                          | ARR1 | 1.13E-11 |          |
| B9-022 | NaOOKK + NO <sub>3</sub>              | →                          | ARR1 | 2.02E-15 |          |
| B9-023 | PhOKHEst + HO                         | →                          | ARR1 | 1.95E-11 |          |
| B9-024 | PhOKAnhy + HO                         | →                          | ARR1 | 6.40E-12 |          |
| B9-025 | PhOKOEst + HO                         | →                          | ARR1 | 1.66E-11 |          |
| B9-026 | PhPOKA + HO                           | →                          | ARR1 | 7.27E-12 |          |
| B9-027 | PhPOKA                                | → 3PhOKA + NO <sub>2</sub> | ARR2 | 5.20E+16 | 13850.00 |
| B9-028 | PhPOKD + HO                           | →                          | ARR1 | 1.80E-11 |          |
| B9-029 | PhPOKD                                | → 3PhOKD + NO <sub>2</sub> | ARR2 | 5.20E+16 | 13850.00 |
| B9-030 | PhGOKD + HO                           | →                          | ARR1 | 2.59E-11 |          |
| B9-031 | PhAOKD + HO                           | →                          | ARR1 | 2.02E-11 |          |
| B9-032 | PhDKA + HO                            | →                          | ARR1 | 1.23E-11 |          |
| B9-033 | HPhOA + HO                            | →                          | ARR1 | 5.21E-11 |          |
| B9-034 | OPhOA + HO                            | →                          | ARR1 | 1.21E-10 |          |
| B9-035 | VOPhOA + HO                           | →                          | ARR1 | 1.28E-11 |          |
| B9-036 | PhOP + HO                             | →                          | ARR1 | 2.00E-11 |          |
| B9-037 | PhOP                                  | → 3PhO + NO <sub>2</sub>   | ARR2 | 5.20E+16 | 13850.00 |
| B9-038 | PhOG + HO                             | →                          | ARR1 | 2.79E-11 |          |
| B9-039 | PhOA + HO                             | →                          | ARR1 | 2.21E-11 |          |
| B9-040 | PhD + HO                              | →                          | ARR1 | 1.26E-11 |          |
| B9-041 | PhKKAnhy + HO                         | →                          | ARR1 | 1.15E-13 |          |
| B9-042 | HPhKA + HO                            | →                          | ARR1 | 4.42E-12 |          |
| B9-043 | OPhKA + HO                            | →                          | ARR1 | 5.72E-12 |          |
| B9-044 | VOPhKA + HO                           | →                          | ARR1 | 5.16E-13 |          |
| B9-045 | PhKP + HO                             | →                          | ARR1 | 5.01E-13 |          |
| B9-046 | PhKP                                  | → 3PhK + NO <sub>2</sub>   | ARR2 | 5.20E+16 | 13850.00 |
| B9-047 | PhKG + HO                             | →                          | ARR1 | 3.60E-12 |          |
| B9-048 | PhKA + HO                             | →                          | ARR1 | 6.21E-13 |          |
| B9-049 | HPh + HO                              | →                          | ARR1 | 8.32E-12 |          |
| B9-050 | OPh + HO                              | →                          | ARR1 | 2.82E-11 |          |
| B9-051 | OPh + NO <sub>3</sub>                 | →                          | ARR1 | 4.50E-12 |          |
| B9-052 | VOPh + HO                             | →                          | ARR1 | 1.64E-12 |          |
| B9-053 | PhKAKA + HO                           | →                          | ARR1 | 3.55E-13 |          |
| B9-054 | PhKOHEst + HO                         | →                          | ARR1 | 1.95E-11 |          |
| B9-055 | PhKOAAnhy + HO                        | →                          | ARR1 | 6.40E-12 |          |
| B9-056 | PhKOOEst + HO                         | →                          | ARR1 | 1.66E-11 |          |
| B9-057 | PhPKOA + HO                           | →                          | ARR1 | 2.42E-12 |          |
| B9-058 | PhPKOA                                | → 3PhKOA + NO <sub>2</sub> | ARR2 | 5.20E+16 | 13850.00 |
| B9-059 | PhPKOD + HO                           | →                          | ARR1 | 1.94E-11 |          |
| B9-060 | PhPKOD                                | → 3PhKOD + NO <sub>2</sub> | ARR2 | 5.20E+16 | 13850.00 |
| B9-061 | PhPKOD + NO <sub>3</sub>              | →                          | ARR1 | 1.85E-13 |          |
| B9-062 | PhGKOD + HO                           | →                          | ARR1 | 2.25E-11 |          |
| B9-063 | PhGKOD + NO <sub>3</sub>              | →                          | ARR1 | 1.85E-13 |          |
| B9-064 | PhAKOD + HO                           | →                          | ARR1 | 2.00E-11 |          |
| B9-065 | PhAKOD + NO <sub>3</sub>              | →                          | ARR1 | 1.85E-13 |          |
| B9-066 | PhAKD + HO                            | →                          | ARR1 | 1.46E-11 |          |
| B9-067 | OPhKOA + HO                           | →                          | ARR1 | 8.43E-12 |          |
| B9-068 | PhKOP                                 | → 3PhKO + NO <sub>2</sub>  | ARR2 | 5.20E+16 | 13850.00 |
| B9-069 | PhKOP + HO                            | →                          | ARR1 | 1.18E-12 |          |
| B9-070 | PhKOG + HO                            | →                          | ARR1 | 9.10E-12 |          |
| B9-071 | PhKOA + HO                            | →                          | ARR1 | 3.34E-12 |          |
| B9-072 | PhKD + HO                             | →                          | ARR1 | 1.34E-11 |          |
| B9-073 | HPhKKA + HO                           | →                          | ARR1 | 4.42E-12 |          |
| B9-074 | OPhKKA + HO                           | →                          | ARR1 | 5.72E-12 |          |
| B9-075 | VOPhKKA + HO                          | →                          | ARR1 | 5.16E-13 |          |
| B9-076 | PhKAnhy + HO                          | →                          | ARR1 | 3.12E-13 |          |



|        |                |                |      |           |          |
|--------|----------------|----------------|------|-----------|----------|
| B9-077 | NaONort + HO   | →              | ARR1 | 9.16E-11  |          |
| B9-078 | NaONort + O3   | →              | ARR1 | 8.24E-18  |          |
| B9-079 | NaONort + NO3  | →              | ARR1 | 3.43E-13  |          |
| B9-080 | NaOHort + HO   | →              | ARR1 | 2.26E-10  |          |
| B9-081 | NaOHort + O3   | →              | ARR1 | 1.87E-16  |          |
| B9-082 | NaOHort + NO3  | →              | ARR1 | 3.43E-13  |          |
| B9-083 | NaOOort + HO   | →              | ARR1 | 2.65E-10  |          |
| B9-084 | NaOOort + O3   | →              | ARR1 | 2.62E-16  |          |
| B9-085 | NaOOort + NO3  | →              | ARR1 | 3.09E-13  |          |
| B9-086 | PhDCD + HO     | →              | ARR1 | 4.06E-11  |          |
| B9-087 | PhDCA + HO     | →              | ARR1 | 1.99E-11  |          |
| B9-088 | PhDNOD + HO    | →              | ARR1 | 2.87E-11  |          |
| B9-089 | PhDNOD + NO3   | →              | ARR1 | 4.55E-13  |          |
| B9-090 | PhDHOD + HO    | →              | ARR1 | 5.09E-11  |          |
| B9-091 | PhDHOD + NO3   | →              | ARR1 | 4.55E-13  |          |
| B9-092 | PhDOOD + HO    | →              | ARR1 | 6.03E-11  |          |
| B9-093 | PhDOOD + NO3   | →              | ARR1 | 4.58E-13  |          |
| B9-094 | PhUAnhy + HO   | →              | ARR2 | 0.622E-11 | -540.0   |
| B9-095 | PhUAnhy + O3   | →              | ARR1 | 1.80E-16  |          |
| B9-096 | PhUAnhy + NO3  | →              | ARR1 | 0.272E-14 |          |
| B9-097 | PhUHEst1 + HO  | → 0.5 PhUAnhy  | ARR1 | 1.17E-10  |          |
| B9-098 | PhUHEst1 + O3  | →              | ARR1 | 9.00E-15  |          |
| B9-099 | PhUHEst1 + NO3 | →              | ARR1 | 3.40E-13  |          |
| B9-100 | PhUOEst1 + HO  | → 0.5 PhUAnhy  | ARR1 | 1.25E-10  |          |
| B9-101 | PhUOEst1 + O3  | →              | ARR1 | 1.26E-14  |          |
| B9-102 | PhUOEst1 + NO3 | →              | ARR1 | 3.05E-13  |          |
| B9-103 | PhPUA1 + HO    | →              | ARR1 | 5.17E-11  |          |
| B9-104 | PhPUA1         | → 3PhUA1 + NO2 | ARR2 | 5.20E+16  | 13850.00 |
| B9-105 | PhGUA1 + HO    | → 0.1 3PhUA1   | ARR1 | 5.48E-11  |          |
| B9-106 | PhGUA1 + NO3   | →              | ARR1 | 3.40E-13  |          |
| B9-107 | PhAUA + HO     | →              | ARR1 | 5.23E-11  |          |
| B9-108 | PhAUA + NO3    | →              | ARR1 | 3.40E-13  |          |
| B9-109 | PhPUD1 + HO    | →              | ARR1 | 5.87E-11  |          |
| B9-110 | PhPUD1         | → 3PhUD1 + NO2 | ARR2 | 5.20E+16  | 13850.00 |
| B9-111 | PhGUD1 + HO    | → 0.1 3PhUD1   | ARR1 | 6.18E-11  |          |
| B9-112 | PhAUD1 + HO    | → 0.25 3PhUA1  | ARR1 | 5.92E-11  |          |
| B9-113 | PhUP           | → 3PhU + NO2   | ARR2 | 5.20E+16  | 13850.00 |
| B9-114 | PhUP + HO      | →              | ARR1 | 4.39E-11  |          |
| B9-115 | PhUG + HO      | →              | ARR1 | 4.70E-11  |          |
| B9-116 | PhUG + NO3     | →              | ARR1 | 3.40E-13  |          |
| B9-117 | PhUA + HO      | →              | ARR1 | 4.45E-11  |          |
| B9-118 | PhUA + NO3     | →              | ARR1 | 3.40E-13  |          |
| B9-119 | PhUHEst2 + HO  | → 0.5 PhUAnhy  | ARR1 | 1.17E-10  |          |
| B9-120 | PhUHEst2 + O3  | →              | ARR1 | 9.00E-15  |          |
| B9-121 | PhUHEst2 + NO3 | →              | ARR1 | 3.40E-13  |          |
| B9-122 | PhUOEst2 + HO  | → 0.5 PhUAnhy  | ARR1 | 1.25E-10  |          |
| B9-123 | PhUOEst2 + O3  | →              | ARR1 | 1.26E-14  |          |
| B9-124 | PhUOEst2 + NO3 | →              | ARR1 | 3.05E-13  |          |
| B9-125 | PhPUA2 + HO    | →              | ARR1 | 5.17E-11  |          |
| B9-126 | PhPUA2         | → 3PhUA2 + NO2 | ARR2 | 5.20E+16  | 13850.00 |
| B9-127 | PhGUA2 + HO    | → 0.1 3PhUA2   | ARR1 | 5.48E-11  |          |
| B9-128 | PhGUA2 + NO3   | →              | ARR1 | 3.40E-13  |          |
| B9-129 | HPhUA + HO     | →              | ARR1 | 6.18E-11  |          |
| B9-130 | OPhUA + HO     | →              | ARR1 | 1.01E-10  |          |
| B9-131 | VOPhUA + HO    | →              | ARR1 | 7.00E-11  |          |
| B9-132 | PhPUD2 + HO    | →              | ARR1 | 5.87E-11  |          |
| B9-133 | PhPUD2         | → 3PhUD2 + NO2 | ARR2 | 5.20E+16  | 13850.00 |
| B9-134 | PhGUD2 + HO    | → 0.1 3PhUD2   | ARR1 | 6.18E-11  |          |
| B9-135 | PhAUD2 + HO    | → 0.25 3PhUA2  | ARR1 | 5.92E-11  |          |
| B9-136 | NaONBp + HO    | →              | ARR1 | 5.38E-11  |          |
| B9-137 | NaONBp + NO3   | →              | ARR1 | 1.91E-13  |          |
| B9-138 | NaOHBp + HO    | →              | ARR1 | 7.27E-11  |          |
| B9-139 | NaOHBp + NO3   | →              | ARR1 | 1.91E-13  |          |
| B9-140 | NaOOBp + HO    | →              | ARR1 | 1.04E-10  |          |
| B9-141 | NaOOBp + NO3   | →              | ARR1 | 2.08E-13  |          |
| B9-142 | NaOKBp + HO    | →              | ARR1 | 2.70E-11  |          |
| B9-143 | NaOKBp + NO3   | →              | ARR1 | 1.89E-13  |          |
| B9-144 | PhOCHEst + HO  | →              | ARR1 | 3.67E-11  |          |

|        |                |   |              |      |          |          |
|--------|----------------|---|--------------|------|----------|----------|
| B9-145 | PhOCAnhy + HO  | → |              | ARR1 | 2.52E-11 |          |
| B9-146 | PhOCOEst + HO  | → |              | ARR1 | 3.67E-11 |          |
| B9-147 | PhAOCP         | → | 3PhAOC + NO2 | ARR2 | 5.20E+16 | 13850.00 |
| B9-148 | PhAOCP + HO    | → |              | ARR1 | 5.43E-11 |          |
| B9-149 | PhAOCG + HO    | → |              | ARR1 | 5.93E-11 |          |
| B9-150 | PhAOCA + HO    | → |              | ARR1 | 6.28E-11 |          |
| B9-151 | PhAON + HO     | → |              | ARR1 | 4.91E-11 |          |
| B9-152 | PhAOH + HO     | → |              | ARR1 | 6.28E-11 |          |
| B9-153 | PhAOO + HO     | → |              | ARR1 | 6.90E-11 |          |
| B9-154 | PhAOD + HO     | → |              | ARR1 | 6.50E-11 |          |
| B9-155 | PhAOD + NO3    | → |              | ARR1 | 2.74E-13 |          |
| B9-156 | PhPOCD         | → | 3PhOCD + NO2 | ARR2 | 5.20E+16 | 13850.00 |
| B9-157 | PhPOCD + HO    | → |              | ARR1 | 7.57E-11 |          |
| B9-158 | PhGOCD + HO    | → |              | ARR1 | 7.88E-11 |          |
| B9-159 | PhAOCD + HO    | → |              | ARR1 | 7.62E-11 |          |
| B9-160 | PhOCP          | → | 3PhOC + NO2  | ARR2 | 5.20E+16 | 13850.00 |
| B9-161 | PhOCP + HO     | → |              | ARR1 | 2.69E-11 |          |
| B9-162 | PhOCG + HO     | → |              | ARR1 | 3.19E-11 |          |
| B9-163 | PhOCA + HO     | → |              | ARR1 | 3.53E-11 |          |
| B9-164 | PhON + HO      | → |              | ARR1 | 2.16E-11 |          |
| B9-165 | PhOH + HO      | → |              | ARR1 | 3.54E-11 |          |
| B9-166 | PhOO + HO      | → |              | ARR1 | 4.15E-11 |          |
| B9-167 | PhOD + HO      | → |              | ARR1 | 3.75E-11 |          |
| B9-168 | PhOD + NO3     | → |              | ARR1 | 2.74E-13 |          |
| B9-169 | ONaONBp + HO   | → |              | ARR1 | 1.17E-10 |          |
| B9-170 | ONaONBp + NO3  | → |              | ARR1 | 1.91E-13 |          |
| B9-171 | ONaOHBp + HO   | → |              | ARR1 | 1.36E-10 |          |
| B9-172 | ONaOHBp + NO3  | → |              | ARR1 | 1.91E-13 |          |
| B9-173 | ONaOOBp + HO   | → |              | ARR1 | 3.31E-10 |          |
| B9-174 | ONaOOBp + NO3  | → |              | ARR1 | 2.08E-13 |          |
| B9-175 | ONaOKBp + HO   | → |              | ARR1 | 3.54E-11 |          |
| B9-176 | ONaOKBp + NO3  | → |              | ARR1 | 1.89E-13 |          |
| B9-177 | OPhDD + HO     | → |              | ARR1 | 2.43E-11 |          |
| B9-178 | ONaONpar + HO  | → |              | ARR1 | 3.61E-10 |          |
| B9-179 | ONaOHpar + O3  | → |              | ARR1 | 1.15E-17 |          |
| B9-180 | ONaONpar + NO3 | → |              | ARR1 | 3.05E-13 |          |
| B9-181 | ONaOHpar + HO  | → |              | ARR1 | 4.19E-10 |          |
| B9-182 | ONaOHpar + O3  | → |              | ARR1 | 2.62E-16 |          |
| B9-183 | ONaOHpar + NO3 | → |              | ARR1 | 3.05E-13 |          |
| B9-184 | ONaOopar + HO  | → |              | ARR1 | 1.16E-09 |          |
| B9-185 | ONaOopar + O3  | → |              | ARR1 | 3.67E-16 |          |
| B9-186 | ONaOopar + NO3 | → |              | ARR1 | 2.73E-13 |          |
| B9-187 | ONaOKpar + O3  | → |              | ARR1 | 5.24E-18 |          |
| B9-188 | ONaOKpar + NO3 | → |              | ARR1 | 7.96E-15 |          |
| B9-189 | ONaQuin + HO   | → |              | ARR1 | 3.49E-11 |          |
| B9-190 | ONaNOOK + HO   | → |              | ARR1 | 3.23E-11 |          |
| B9-191 | ONaNOOK + NO3  | → |              | ARR1 | 5.30E-15 |          |
| B9-192 | ONaHOOK + HO   | → |              | ARR1 | 6.11E-11 |          |
| B9-193 | ONaHOOK + NO3  | → |              | ARR1 | 5.30E-15 |          |
| B9-194 | ONaOOOK + HO   | → |              | ARR1 | 7.35E-11 |          |
| B9-195 | ONaOOOK + NO3  | → |              | ARR1 | 9.95E-15 |          |
| B9-196 | ONaOOKK + HO   | → |              | ARR1 | 3.55E-11 |          |
| B9-197 | ONaOOKK + NO3  | → |              | ARR1 | 2.02E-15 |          |
| B9-198 | OPhODKD + HO   | → |              | ARR1 | 3.56E-11 |          |
| B9-199 | OPhODKD + NO3  | → |              | ARR1 | 2.87E-13 |          |
| B9-200 | ONaONort + HO  | → |              | ARR1 | 3.40E-10 |          |
| B9-201 | ONaONort + O3  | → |              | ARR1 | 8.24E-18 |          |
| B9-202 | ONaONort + NO3 | → |              | ARR1 | 3.43E-13 |          |
| B9-203 | ONaOHort + HO  | → |              | ARR1 | 4.75E-10 |          |
| B9-204 | ONaOHort + O3  | → |              | ARR1 | 1.87E-16 |          |
| B9-205 | ONaOHort + NO3 | → |              | ARR1 | 3.43E-13 |          |
| B9-206 | ONaOOort + HO  | → |              | ARR1 | 5.14E-10 |          |
| B9-207 | ONaOOort + O3  | → |              | ARR1 | 2.62E-16 |          |
| B9-208 | ONaOOort + NO3 | → |              | ARR1 | 3.09E-13 |          |
| B9-209 | ONaOKort + HO  | → |              | ARR1 | 3.55E-10 |          |
| B9-210 | ONaOKort + O3  | → |              | ARR1 | 3.74E-18 |          |
| B9-211 | ONaOKort + NO3 | → |              | ARR1 | 8.03E-15 |          |
| B9-212 | OPhDCD + HO    | → |              | ARR1 | 4.90E-11 |          |

|        |                |                |      |           |          |
|--------|----------------|----------------|------|-----------|----------|
| B9-213 | OPhDCA + HO    | →              | ARR1 | 2.83E-11  |          |
| B9-214 | OPhDNOD + HO   | →              | ARR1 | 6.00E-11  |          |
| B9-215 | OPhDNOD + NO3  | →              | ARR1 | 4.66E-14  |          |
| B9-216 | OPhDHOD + HO   | →              | ARR1 | 7.09E-11  |          |
| B9-217 | OPhDHOD + NO3  | →              | ARR1 | 4.55E-13  |          |
| B9-218 | OPhDOOD + HO   | →              | ARR1 | 8.45E-11  |          |
| B9-219 | OPhDOOD + NO3  | →              | ARR1 | 4.58E-13  |          |
| B9-220 | OPhDKOD + HO   | →              | ARR1 | 7.20E-11  |          |
| B9-221 | OPhDKOD + NO3  | →              | ARR1 | 1.34E-14  |          |
| B9-222 | OPhUAnhy + HO  | →              | ARR2 | 0.622E-11 | -540.0   |
| B9-223 | OPhUAnhy + NO3 | →              | ARR1 | 0.272E-14 |          |
| B9-224 | OPhAUA + HO    | →              | ARR1 | 5.23E-11  |          |
| B9-225 | OPhAUA + NO3   | →              | ARR1 | 3.40E-13  |          |
| B9-226 | OPhAD + HO     | →              | ARR1 | 1.38E-11  |          |
| B9-227 | OPhD + HO      | →              | ARR1 | 1.46E-11  |          |
| B9-228 | OHPPhUA + HO   | →              | ARR1 | 6.18E-11  |          |
| B9-229 | OOPhUA + HO    | →              | ARR1 | 1.01E-10  |          |
| B9-230 | VOOPhUA + HO   | →              | ARR1 | 7.00E-11  |          |
| B9-231 | NaOONBp + HO   | →              | ARR1 | 8.11E-11  |          |
| B9-232 | NaOONBp + NO3  | →              | ARR1 | 9.09E-13  |          |
| B9-233 | NaOOHBp + HO   | →              | ARR1 | 9.41E-11  |          |
| B9-234 | NaOOHBp + NO3  | →              | ARR1 | 9.09E-13  |          |
| B9-235 | NaOOOBp + HO   | →              | ARR1 | 2.16E-10  |          |
| B9-236 | NaOOOBp + NO3  | →              | ARR1 | 9.26E-13  |          |
| B9-237 | NaOOKBp + HO   | →              | ARR1 | 2.64E-11  |          |
| B9-238 | NaOOKBp + NO3  | →              | ARR1 | 9.07E-13  |          |
| B9-239 | NaOONort + HO  | →              | ARR1 | 9.16E-11  |          |
| B9-240 | NaOONort + O3  | →              | ARR1 | 8.24E-18  |          |
| B9-241 | NaOONort + NO3 | →              | ARR1 | 3.43E-13  |          |
| B9-242 | NaOOHort + HO  | →              | ARR1 | 2.26E-10  |          |
| B9-243 | NaOOHort + O3  | →              | ARR1 | 1.87E-16  |          |
| B9-244 | NaOOHort + NO3 | →              | ARR1 | 3.43E-13  |          |
| B9-245 | NaOOOort + HO  | →              | ARR1 | 2.65E-10  |          |
| B9-246 | NaOOOort + O3  | →              | ARR1 | 2.62E-16  |          |
| B9-247 | NaOOOort + NO3 | →              | ARR1 | 3.09E-13  |          |
| B9-248 | NaOOKort + HO  | →              | ARR1 | 1.06E-10  |          |
| B9-249 | NaOOKort + O3  | →              | ARR1 | 3.74E-18  |          |
| B9-250 | NaOOKort + NO3 | →              | ARR1 | 8.03E-15  |          |
| B9-251 | PhDOOND + HO   | →              | ARR1 | 3.00E-11  |          |
| B9-252 | PhDOOND + NO3  | →              | ARR1 | 4.98E-14  |          |
| B9-253 | PhDOOKD + HO   | →              | ARR1 | 2.96E-11  |          |
| B9-254 | PhDOOD1 + HO   | →              | ARR1 | 4.40E-11  |          |
| B9-255 | PhDOOD1 + NO3  | →              | ARR1 | 5.68E-13  |          |
| B9-256 | PhOOAnhy + HO  | →              | ARR1 | 1.22E-11  |          |
| B9-257 | PhA + HO       | →              | ARR1 | 5.77E-12  |          |
| B9-258 | PhDKND + HO    | →              | ARR1 | 2.52E-11  |          |
| B9-259 | PhDKND + NO3   | →              | ARR1 | 2.89E-14  |          |
| B9-260 | PhDKHD + HO    | →              | ARR1 | 3.34E-11  |          |
| B9-261 | PhDKHD + NO3   | →              | ARR1 | 2.89E-14  |          |
| B9-262 | PhOUHEst + HO  | →              | ARR1 | 1.285E-10 |          |
| B9-263 | PhOUAnhy + HO  | →              | ARR2 | 4.96E-11  |          |
| B9-264 | PhOUOEst + HO  | →              | ARR1 | 1.365E-10 |          |
| B9-265 | PhPOUA + HO    | →              | ARR1 | 6.32E-11  |          |
| B9-266 | PhPOUA         | → 3PhOUA + NO2 | ARR2 | 5.20E+16  | 13850.00 |
| B9-267 | PhGOUA + HO    | →              | ARR1 | 6.63E-11  |          |
| B9-268 | PhAOUA + HO    | →              | ARR1 | 6.38E-11  |          |
| B9-269 | PhPOUD + HO    | → HO           | ARR1 | 7.02E-11  |          |
| B9-270 | PhPOUD         | → 3PhOUD + NO2 | ARR2 | 5.20E+16  | 13850.00 |
| B9-271 | PhGOUD + HO    | →              | ARR1 | 7.33E-11  |          |
| B9-272 | PhAOUD + HO    | →              | ARR1 | 7.07E-11  |          |
| B9-273 | HPhOUA + HO    | →              | ARR1 | 7.33E-11  |          |
| B9-274 | OPhOUA + HO    | →              | ARR1 | 1.125E-10 |          |
| B9-275 | VOPhOUA + HO   | →              | ARR1 | 8.15E-11  |          |
| B9-276 | PhOUP          | → 3PhOU + NO2  | ARR2 | 5.20E+16  | 13850.00 |
| B9-277 | PhOUP + HO     | →              | ARR1 | 5.54E-11  |          |
| B9-278 | PhOUG + HO     | →              | ARR1 | 5.85E-11  |          |
| B9-279 | PhOUA + HO     | →              | ARR1 | 5.60E-11  |          |
| B9-280 | NaOKKN + HO    | →              | ARR1 | 2.89E-12  |          |

|        |                |   |             |      |           |          |
|--------|----------------|---|-------------|------|-----------|----------|
| B9-281 | NaOKKH + HO    | → |             | ARR1 | 1.76E-11  |          |
| B9-282 | NaOKKK + HO    | → |             | ARR1 | 3.53E-12  |          |
| B9-283 | NaNKON + HO    | → |             | ARR1 | 2.65E-12  |          |
| B9-284 | NaHKON + HO    | → |             | ARR1 | 1.12E-11  |          |
| B9-285 | NaOKON + HO    | → |             | ARR1 | 1.41E-11  |          |
| B9-286 | NaKKON + HO    | → |             | ARR1 | 4.76E-12  |          |
| B9-287 | PhGND + HO     | → |             | ARR1 | 2.85E-11  |          |
| B9-288 | PhGND + NO3    | → |             | ARR1 | 1.89E-14  |          |
| B9-289 | PhAND + HO     | → |             | ARR1 | 2.60E-11  |          |
| B9-290 | PhAND + NO3    | → |             | ARR1 | 1.89E-14  |          |
| B9-291 | PhPND + HO     | → |             | ARR1 | 2.55E-11  |          |
| B9-292 | PhPND          | → | 3PhND + NO2 | ARR2 | 5.20E+16  | 13850.00 |
| B9-293 | PhPND + NO3    | → |             | ARR1 | 1.89E-14  |          |
| B9-294 | PhNA + HO      | → |             | ARR1 | 5.86E-12  |          |
| B9-295 | PhNG + HO      | → |             | ARR1 | 8.56E-12  |          |
| B9-296 | PhNP           | → | 3PhN + NO2  | ARR2 | 5.20E+16  | 13850.00 |
| B9-297 | PhNP + HO      | → |             | ARR1 | 5.24E-12  |          |
| B9-298 | PhAnhy + HO    | → |             | ARR1 | 8.44E-13  |          |
| B9-299 | PhEstH + HO    | → | 0.55 PhAnhy | ARR1 | 1.01E-11  |          |
| B9-300 | PhEstO + HO    | → | 0.28 PhAnhy | ARR1 | 1.59E-11  |          |
| B9-301 | PhGA + HO      | → |             | ARR1 | 1.61E-11  |          |
| B9-302 | PhPA + HO      | → |             | ARR1 | 1.30E-11  |          |
| B9-303 | PhAA + HO      | → | 0.1 3PhA    | ARR1 | 1.36E-11  |          |
| B9-304 | PhPA           | → | 3PhA + NO2  | ARR2 | 5.20E+16  | 13850.00 |
| B9-305 | HPhA + HO      | → | 0.23 3PhA   | ARR1 | 1.64E-11  |          |
| B9-306 | OPhA + HO      | → | 0.1 1PhA    | ARR1 | 3.44E-11  |          |
| B9-307 | VOPhA + HO     | → |             | ARR1 | 4.93E-12  |          |
| B9-308 | PhGD + HO      | → | 0.20 3PhD   | ARR1 | 1.64E-11  |          |
| B9-309 | PhPD           | → | 3PhD + NO2  | ARR2 | 5.20E+16  | 13850.00 |
| B9-310 | PhPD + HO      | → |             | ARR1 | 1.64E-11  |          |
| B9-311 | HPhD + HO      | → | 0.23 3PhD   | ARR1 | 1.64E-11  |          |
| B9-312 | VOPhD + HO     | → |             | ARR1 | 9.40E-12  |          |
| B9-313 | NaOOO + HO     | → |             | ARR1 | 4.955E-10 |          |
| B9-314 | NaVOO + HO     | → |             | ARR1 | 1.00E-10  |          |
| B9-315 | NaHO + HO      | → |             | ARR1 | 7.80E-11  |          |
| B9-316 | NaOOK + HO     | → |             | ARR1 | 7.51E-11  |          |
| B9-317 | NaOOK + O3     | → |             | ARR1 | 8.39E-17  |          |
| B9-318 | NaOOK + NO3    | → |             | ARR1 | 3.09E-13  |          |
| B9-319 | NaOOONBp + HO  | → |             | ARR1 | 2.06E-10  |          |
| B9-320 | NaOOONBp + NO3 | → |             | ARR1 | 9.08E-13  |          |
| B9-321 | NaOOOHBp + HO  | → |             | ARR1 | 2.17E-10  |          |
| B9-322 | NaOOOHBp + NO3 | → |             | ARR1 | 4.45E-12  |          |
| B9-323 | NaOOOOBp + HO  | → |             | ARR1 | 2.06E-10  |          |
| B9-324 | NaOOOOBp + NO3 | → |             | ARR1 | 9.08E-13  |          |

---

**M02 (CH3O2.) and MOH (CH3OH) are species from RACM2**

**Table S4: kinetics.**

| <b>kinetic type</b> | <b>formula</b>                                                                                                         |
|---------------------|------------------------------------------------------------------------------------------------------------------------|
| <i>ARR1</i>         | $k = x_1$                                                                                                              |
| <i>ARR1(XX)</i>     | $k = x_1 [XX]$                                                                                                         |
| <i>ARR2</i>         | $k = x_1 e^{\frac{-x_2}{T}}$                                                                                           |
| <i>ARR2(XX)</i>     | $k = x_1 e^{\frac{-x_2}{T}} [XX]$                                                                                      |
| <i>ARR3</i>         | $k = x_1 T^{x_2} e^{\frac{-x_3}{T}}$                                                                                   |
| <i>PHOTO</i>        | $k = x_1$ (value associated to experimental UV lamps see table S5 for atmospheric values depending on zenithal angles) |

**Table S5: atmospheric photolysis rates.**

| reaction ID | reaction                             | atmospheric photolysis rates at sea level for the following zenithal angles: 0, 10, 20, 30, 40, 50, 60, 70, 78, 86, 90.  |
|-------------|--------------------------------------|--------------------------------------------------------------------------------------------------------------------------|
| B1-003      | NaV → 1Na + NO                       | 2.1526E-04 2.1268E-04 2.0491E-04 1.9159E-04 1.7219E-04 1.4589E-04 1.1178E-04 7.0091E-05 3.5657E-05 1.0972E-05 0.0000E+00 |
| B3-008      | NaOPEN → 3PhU + CO + HO2             | 4.7518E-05 4.6558E-05 4.3706E-05 3.9012E-05 3.2618E-05 2.4837E-05 1.6330E-05 8.3723E-06 3.6409E-06 8.8371E-07 0.0000E+00 |
| B3-009      | NaOPEN → PhDD + 2.0 CO + 2.0 HO2     | 2.9336E-06 2.8914E-06 2.7643E-06 2.5488E-06 2.2406E-06 1.8363E-06 1.3410E-06 7.9317E-07 3.9615E-07 1.2047E-07 0.0000E+00 |
| B3-010      | NaOPEN → 5PhDCrg + CO                | 2.8473E-06 2.8063E-06 2.6830E-06 2.4738E-06 2.1747E-06 1.7823E-06 1.3016E-06 7.6984E-07 3.8450E-07 1.1692E-07 0.0000E+00 |
| B3-011      | NaOPEN → 4NaOPEN2 + HO2              | 2.8473E-06 2.8063E-06 2.6830E-06 2.4738E-06 2.1747E-06 1.7823E-06 1.3016E-06 7.6984E-07 3.8450E-07 1.1692E-07 0.0000E+00 |
| B5.3-008    | ONaOPEN → 3OPhU + CO + HO2           | 4.7518E-05 4.6558E-05 4.3706E-05 3.9012E-05 3.2618E-05 2.4837E-05 1.6330E-05 8.3723E-06 3.6409E-06 8.8371E-07 0.0000E+00 |
| B5.3-009    | ONaOPEN → OPhDD + 2.0 CO + 2.0 HO2   | 2.9336E-06 2.8914E-06 2.7643E-06 2.5488E-06 2.2406E-06 1.8363E-06 1.3410E-06 7.9317E-07 3.9615E-07 1.2047E-07 0.0000E+00 |
| B5.3-010    | ONaOPEN → 5OPhDCrg + CO              | 2.8473E-06 2.8063E-06 2.6830E-06 2.4738E-06 2.1747E-06 1.7823E-06 1.3016E-06 7.6984E-07 3.8450E-07 1.1692E-07 0.0000E+00 |
| B5.3-011    | ONaOPEN → 4ONaOPEN + HO2             | 2.8473E-06 2.8063E-06 2.6830E-06 2.4738E-06 2.1747E-06 1.7823E-06 1.3016E-06 7.6984E-07 3.8450E-07 1.1692E-07 0.0000E+00 |
| B5.6-021    | PhNDKD → PhKDD + NO2 + CO + HO2      | 2.4221E-06 2.3612E-06 2.1827E-06 1.8975E-06 1.5263E-06 1.1023E-06 6.7659E-07 3.1883E-07 1.2888E-07 2.9137E-08 0.0000E+00 |
| B5.6-022    | PhNDKD → PhKDD + CO + NO2 + HO2      | 1.7676E-05 1.7243E-05 1.5970E-05 1.3924E-05 1.1243E-05 8.1515E-06 5.0161E-06 2.3590E-06 9.4442E-07 2.0833E-07 0.0000E+00 |
| B5.6-023    | PhNDKD → 3PhND + CO + HO2            | 7.6968E-05 7.5838E-05 7.2455E-05 6.6780E-05 5.8776E-05 4.8426E-05 3.5847E-05 2.1662E-05 1.0736E-05 3.1607E-06 0.0000E+00 |
| B6-002      | PhDD → 0.40 2PhEst + 0.60 3PhD + HO2 | 4.8875E-04 4.8275E-04 4.6463E-04 4.3358E-04 3.8835E-04 3.2719E-04 2.4847E-04 1.5397E-04 7.8188E-05 2.4300E-05 0.0000E+00 |
| B6-003      | PhDD → 0.40 2PhEst + 0.60 3PhD + HO2 | 4.8875E-04 4.8275E-04 4.6463E-04 4.3358E-04 3.8835E-04 3.2719E-04 2.4847E-04 1.5397E-04 7.8188E-05 2.4300E-05 0.0000E+00 |
| B8-011      | GLYOX → 2.0 CO                       | 4.4037E-06 4.3088E-06 4.0280E-06 3.5702E-06 2.9552E-06 2.2207E-06 1.4365E-06 7.2308E-07 3.1019E-07 7.4586E-08 0.0000E+00 |
| B8-012      | GLYOX → 2.0 CO + 2.0 HO2             | 3.2716E-05 3.2197E-05 3.0644E-05 2.8043E-05 2.4392E-05 1.9722E-05 1.4180E-05 8.2364E-06 3.9854E-06 1.1449E-06 0.0000E+00 |
| B8-013      | GLYOX → CH2O + CO                    | 1.8343E-05 1.7972E-05 1.6870E-05 1.5061E-05 1.2604E-05 9.6214E-06 6.3626E-06 3.2994E-06 1.4538E-06 3.6451E-07 0.0000E+00 |
| B8-020      | GLYG → CHOOH + CO2                   | 1.3261E-04 1.3095E-04 1.2594E-04 1.1735E-04 1.0485E-04 8.7987E-05 6.6401E-05 4.0830E-05 2.0779E-05 6.5377E-06 0.0000E+00 |
| B8-021      | GLYG → CO + CO2                      | 1.6681E-05 1.6486E-05 1.5897E-05 1.4884E-05 1.3399E-05 1.1370E-05 8.7149E-06 5.4526E-06 2.7763E-06 8.7201E-07 0.0000E+00 |
| B8-023      | GLYA → CH2O + CO2                    | 1.3261E-04 1.3095E-04 1.2594E-04 1.1735E-04 1.0485E-04 8.7987E-05 6.6401E-05 4.0830E-05 2.0779E-05 6.5377E-06 0.0000E+00 |
| B8-024      | GLYA → 2.0 CO                        | 1.6681E-05 1.6486E-05 1.5897E-05 1.4884E-05 1.3399E-05 1.1370E-05 8.7149E-06 5.4526E-06 2.7763E-06 8.7201E-07 0.0000E+00 |
| B8-028      | CH2O → 2.0 HO2 + CO                  | 2.8961E-05 2.8360E-05 2.6576E-05 2.3652E-05 1.9690E-05 1.4905E-05 9.7259E-06 4.9364E-06 2.1192E-06 4.9897E-07 0.0000E+00 |
| B8-029      | CH2O → CO                            | 3.9749E-05 3.9115E-05 3.7212E-05 3.4012E-05 2.9497E-05 2.3696E-05 1.6820E-05 9.5893E-06 4.6494E-06 1.3289E-06 0.0000E+00 |

## Part 2: Modeling data

**Table S6: Final concentrations of simulated secondary species (in  $\mu\text{g}/\text{m}^3$ ).**

| m/z | species    | Gas    | Part. |
|-----|------------|--------|-------|
| 31  | CH2O       | 0.018  | 0     |
| 47  | CHOOH      | 0      | 0     |
| 59  | GLYOX      | 7.398  | 0     |
| 75  | GLYA       | 0.002  | 0     |
| 91  | GLYG       | 0      | 0     |
| 95  | OPh        | 0      | 0     |
| 107 | PhD        | 0.144  | 0     |
| 111 | HPh        | 0      | 0     |
| 123 | PhA        | 0.013  | 0     |
| 123 | OPhD       | 0.007  | 0     |
| 129 | NAPH       | 20.078 | 0     |
| 135 | PhDD       | 9.804  | 0.004 |
| 135 | PhKD       | 0.016  | 0     |
| 137 | PhOD       | 0      | 0     |
| 139 | HPhD       | 0      | 0     |
| 139 | OPhA       | 0      | 0     |
| 140 | VOPh       | 0.027  | 0     |
| 145 | NaO        | 1.397  | 0     |
| 149 | PhAnhy     | 1.15   | 0.163 |
| 149 | PhUA       | 0      | 0     |
| 149 | PhDCD      | 0.005  | 0     |
| 151 | PhEstO     | 0      | 0     |
| 151 | OPhDD      | 0.069  | 0.008 |
| 151 | PhKA       | 0      | 0     |
| 151 | PhAD       | 0.422  | 0.023 |
| 153 | PhOA       | 0      | 0     |
| 153 | PhHD       | 0      | 0     |
| 155 | HPhA       | 0      | 0     |
| 159 | NaKK       | 0.32   | 0     |
| 159 | NaQuin     | 0.697  | 0     |
| 161 | ONaO       | 0.116  | 0.009 |
| 161 | NaH        | 0      | 0     |
| 161 | NaOPEN     | 2.859  | 0.041 |
| 161 | NaOKpar    | 0.944  | 0.003 |
| 161 | NaOKort    | 0.595  | 0.002 |
| 161 | NaOO       | 0.084  | 0.007 |
| 163 | NaOOpar    | 0      | 0     |
| 163 | NaOOort    | 0      | 0     |
| 163 | PhKDD      | 0.139  | 0.001 |
| 165 | OPhDCD     | 0      | 0     |
| 165 | PhDCA      | 0.002  | 0     |
| 165 | PhOUA      | 0      | 0     |
| 165 | PhUG       | 0      | 0     |
| 165 | PhDOD      | 0      | 0     |
| 165 | PhEpoxA    | 0      | 0     |
| 165 | OPhUA      | 0      | 0     |
| 167 | OPhAD      | 0.001  | 0.002 |
| 167 | PhEstH     | 0      | 0     |
| 167 | PhGD       | 0      | 0     |
| 167 | PhKG       | 0      | 0     |
| 167 | OPhKA      | 0      | 0     |
| 167 | PhAA       | 0.006  | 0.015 |
| 168 | VOPhD      | 0.782  | 0.088 |
| 169 | PhOG       | 0      | 0     |
| 169 | OPhOA      | 0      | 0     |
| 174 | NaV        | 2.935  | 0.001 |
| 175 | ONaQuin    | 0.005  | 0     |
| 175 | NaKKEpox   | 2.886  | 0.002 |
| 175 | PhUAnhy    | 0.194  | 0.207 |
| 177 | NaOPENEpox | 0.838  | 0.001 |
| 177 | NaOOO      | 0.015  | 0.031 |
| 177 | PhKAnhy    | 0.015  | 0.024 |
| 177 | NaOPENOL   | 0.167  | 0.229 |
| 177 | NaHO       | 0      | 0     |
| 177 | NaOOK      | 0.064  | 0.024 |
| 177 | ONaOPEN    | 0.05   | 0.11  |
| 177 | NaOKEpox   | 0.024  | 0     |
| 177 | ONaOKort   | 0      | 0     |
| 177 | NaOOKort   | 0      | 0     |
| 177 | ONaOKpar   | 0.013  | 0.009 |
| 177 | PhUOEst1   | 0      | 0     |
| 177 | PhAUD1     | 0      | 0     |
| 177 | PhUOEst2   | 0      | 0     |
| 177 | PhAUD2     | 0      | 0     |
| 179 | PhDKA      | 0.004  | 0.005 |
| 179 | ONaOOort   | 0      | 0     |
| 179 | NaOOOort   | 0      | 0     |
| 179 | ONaOOpar   | 0      | 0     |
| 179 | NaOHpar    | 0      | 0     |
| 179 | PhAKD      | 0.007  | 0.011 |
| 179 | NaOHort    | 0      | 0     |
| 179 | NaOOEpox   | 0      | 0     |
| 181 | OPhDCA     | 0      | 0     |
| 181 | PhDOOD1    | 0.019  | 0     |

| m/z | species    | Gas   | Part. |
|-----|------------|-------|-------|
| 181 | PhOUG      | 0     | 0     |
| 181 | HPhUA      | 0     | 0     |
| 181 | PhDHD      | 0     | 0     |
| 181 | PhKOA      | 0     | 0     |
| 181 | PhEpoxA    | 0     | 0     |
| 181 | PhAOD      | 0     | 0     |
| 181 | OOPhUA     | 0     | 0     |
| 181 | OPhOUA     | 0     | 0     |
| 181 | OPhEpoxA   | 0     | 0     |
| 182 | PhND       | 0.002 | 0     |
| 183 | PhGA       | 0     | 0     |
| 183 | HPhKA      | 0     | 0     |
| 184 | VOPhA      | 0.152 | 0.388 |
| 185 | HPhOA      | 0     | 0     |
| 190 | NaVO       | 0.503 | 0.046 |
| 191 | NaOKKK     | 0     | 0     |
| 191 | PhKDKD     | 0.039 | 0.006 |
| 191 | PhDKKD     | 0.207 | 0.033 |
| 191 | PhOUAnhy   | 0.009 | 0.031 |
| 191 | PhEpoxA    | 0.074 | 0.055 |
| 191 | OPhUAnhy   | 0.003 | 0.012 |
| 193 | OPhDEpoxD  | 0.005 | 0.001 |
| 193 | PhOUOEst   | 0     | 0     |
| 193 | PhGUD1     | 0     | 0     |
| 193 | PhGUD2     | 0     | 0     |
| 193 | PhEpoXOEst | 0     | 0     |
| 193 | PhODKD     | 0.258 | 0.439 |
| 193 | PhAOD      | 0     | 0     |
| 193 | PhUHEst1   | 0     | 0     |
| 193 | PhUHEst2   | 0     | 0     |
| 193 | PhAEpoxD   | 0.048 | 0.047 |
| 193 | PhDKOD     | 0.507 | 0.767 |
| 193 | NaOOKK     | 0     | 0     |
| 193 | PhAUA      | 0.001 | 0.002 |
| 195 | PhOOAnhy   | 0.002 | 0.005 |
| 195 | ONaOHort   | 0     | 0     |
| 195 | NaOOHort   | 0     | 0     |
| 195 | ONaOHpar   | 0     | 0     |
| 195 | NaOHEpoxA  | 0     | 0     |
| 195 | PhDOOD     | 0     | 0     |
| 195 | NaOOKK     | 0     | 0     |
| 195 | OPhKKA     | 0     | 0     |
| 197 | HPhOUA     | 0     | 0     |
| 197 | OHPPhUA    | 0     | 0     |
| 197 | PhKOG      | 0     | 0     |
| 197 | PhAHD      | 0     | 0     |
| 197 | HPhEpoxA   | 0     | 0     |

| m/z | species    | Gas   | Part. |
|-----|------------|-------|-------|
| 197 | OPhKOA     | 0     | 0     |
| 198 | PhNA       | 0     | 0     |
| 205 | PhKKAnhy   | 0.024 | 0.049 |
| 206 | NaVOO      | 0.014 | 0.037 |
| 207 | PhOKAnhy   | 0.02  | 0.064 |
| 207 | PhKOAnhy   | 0.032 | 0.098 |
| 208 | NaONpar    | 0.111 | 0.012 |
| 208 | NaONort    | 0.478 | 0.05  |
| 209 | PhDOOKD    | 0     | 0     |
| 209 | PhOUHEst   | 0     | 0     |
| 209 | PhGOUD     | 0     | 0     |
| 209 | NaOKKH     | 0     | 0     |
| 209 | OPhODKD    | 0.209 | 0.6   |
| 209 | PhOKOEst   | 0     | 0     |
| 209 | PhKOOEst   | 0     | 0     |
| 209 | PhEpoXHEst | 0     | 0     |
| 209 | ONaOOKK    | 0     | 0     |
| 209 | PhDKHD     | 0     | 0     |
| 209 | OPhDKOD    | 0     | 0     |
| 209 | PhAOKD     | 0     | 0     |
| 209 | PhGUA1     | 0     | 0     |
| 209 | PhGUA2     | 0     | 0     |
| 209 | PhGEpoxD   | 0     | 0     |
| 209 | PhAOUA     | 0     | 0     |
| 209 | OPhAUA     | 0     | 0     |
| 209 | PhAKOD     | 0     | 0     |
| 209 | PhAEpoxA   | 0     | 0.001 |
| 210 | PhUP       | 0.137 | 0     |
| 210 | VOPhUA     | 0.018 | 0.053 |
| 210 | PhDND      | 0.002 | 0     |
| 211 | PhDOOOD    | 0     | 0     |
| 211 | HPhKKA     | 0     | 0     |
| 211 | ONaOOKK    | 0     | 0     |
| 211 | OPhDOOD    | 0     | 0     |
| 211 | PhDHOD     | 0.001 | 0.002 |
| 211 | NaHOOK     | 0     | 0.001 |
| 212 | PhPD       | 4.163 | 0.006 |
| 212 | VOPhKA     | 0.004 | 0.008 |
| 212 | PhKP       | 0.005 | 0     |
| 213 | PhAOOA     | 0     | 0     |
| 213 | HPhKOA     | 0     | 0     |
| 214 | PhNG       | 0     | 0     |
| 214 | VOPhOA     | 0.001 | 0.021 |
| 214 | PhOP       | 0.054 | 0.001 |
| 223 | PhKAKA     | 0     | 0     |
| 224 | ONaONpar   | 0.001 | 0.002 |
| 224 | ONaONort   | 0.003 | 0.006 |



| m/z | species   | Gas   | Part. |
|-----|-----------|-------|-------|
| 224 | NaONEpox  | 0.309 | 0.029 |
| 224 | NaOONort  | 0.049 | 0.113 |
| 225 | PhGOUA    | 0     | 0     |
| 225 | PhOKHEst  | 0     | 0     |
| 225 | PhGOKD    | 0     | 0     |
| 225 | PhKOHEst  | 0     | 0     |
| 225 | NaOKBp    | 0     | 0     |
| 225 | PhAOKA    | 0     | 0.001 |
| 225 | PhAKOA    | 0     | 0.001 |
| 225 | PhGKOD    | 0     | 0     |
| 225 | PhAEpoxG  | 0     | 0     |
| 226 | VOPhOUA   | 0     | 0.016 |
| 226 | PhOUP     | 0.004 | 0.001 |
| 226 | VOOPhUA   | 0     | 0.006 |
| 226 | PhEpoxP   | 0.032 | 0     |
| 226 | VOPhEpoxA | 0.008 | 0.02  |
| 226 | PhAND     | 0.001 | 0.002 |
| 227 | PhDOOHD   | 0     | 0     |
| 227 | ONaHOOK   | 0     | 0     |
| 227 | NaOOBp    | 0     | 0     |
| 227 | OPhDHOD   | 0     | 0     |
| 228 | PhPA      | 0.942 | 0.774 |
| 238 | NaOKKN    | 0.018 | 0.034 |
| 238 | NaKKON    | 0     | 0     |
| 238 | PhNDKD    | 0     | 0     |
| 238 | PhPUD1    | 0.324 | 0.029 |
| 238 | PhPUD2    | 0.247 | 0.015 |
| 238 | PhDKND    | 0.006 | 0.008 |
| 240 | NaOKON    | 0     | 0     |
| 240 | VOPhKKA   | 0.001 | 0.012 |
| 240 | PhDNOD    | 0.431 | 1.235 |
| 240 | NaNOOK    | 0.16  | 0.431 |
| 241 | PhGOKA    | 0     | 0     |
| 241 | PhGKOA    | 0     | 0     |
| 241 | ONaOKBp   | 0     | 0     |
| 241 | NaOOKBp   | 0.687 | 0.029 |
| 242 | VOPhKOA   | 0.001 | 0.039 |
| 242 | PhKOP     | 0.011 | 0.006 |
| 242 | PhGND     | 0     | 0     |
| 243 | NaOHBp    | 0     | 0     |
| 243 | ONaOOBp   | 0     | 0     |
| 243 | NaOOOBp   | 0     | 0     |
| 254 | PhPOUD    | 0.015 | 0.04  |
| 254 | PhPUA1    | 0.096 | 0.233 |
| 254 | PhPUA2    | 0.069 | 0.168 |
| 254 | PhPEpoxD  | 0.174 | 0.005 |
| 256 | NaHKON    | 0     | 0     |

| m/z | species  | Gas   | Part. |
|-----|----------|-------|-------|
| 256 | PhDOOND  | 0.002 | 0.007 |
| 256 | OPhDNOD  | 0.005 | 0.016 |
| 256 | ONaNOOK  | 0.001 | 0.003 |
| 259 | PhNP     | 0     | 0     |
| 259 | ONaOHBp  | 0     | 0     |
| 259 | NaOOHBp  | 0     | 0     |
| 259 | NaOOOObp | 0     | 0     |
| 270 | PhPOUA   | 0.016 | 0.063 |
| 270 | PhPOKD   | 0.033 | 0.087 |
| 270 | PhPKOD   | 0.053 | 0.133 |
| 270 | PhAEpoxP | 0.059 | 0.126 |
| 272 | NaONBp   | 0.122 | 0.002 |
| 275 | NaOOOHBp | 0     | 0     |
| 285 | NaNKON   | 0     | 0     |
| 286 | PhPOKA   | 0.016 | 0.153 |
| 286 | PhPKOA   | 0.021 | 0.248 |
| 287 | PhPND    | 0     | 0     |
| 288 | ONaONBp  | 0.001 | 0.001 |
| 288 | NaOONBp  | 0.012 | 0.014 |
| 304 | NaOOONBp | 0     | 0     |
